1

2 **Copy number variation profile-based genomic subtyping of premenstrual**  
3 **dysphoric disorder in Chinese**

4

5 Hong Xue<sup>1,2,3\*</sup>, Zhenggang Wu<sup>2,3</sup>, Xi Long<sup>2</sup>, Ata Ullah<sup>2</sup>, Si Chen<sup>2</sup>, Wai-Kin Mat<sup>2</sup>, Peng Sun<sup>1</sup>,  
6 Ming-Zhou Gao<sup>1</sup>, Jie-Qiong Wang<sup>1</sup>, Hai-Jun Wang<sup>1</sup>, Xia Li<sup>1</sup>, Wen-Jun Sun<sup>1</sup>, and Ming-Qi  
7 Qiao<sup>1\*</sup>

8

9 <sup>1</sup>Shandong University of Traditional Chinese Medicine, Jinan, Shandong, People's Republic  
10 of China

11 <sup>2</sup>Division of Life Science, Hong Kong University of Science and Technology, Hong Kong,  
12 People's Republic of China

13 <sup>3</sup>School of Basic Medicine and Clinical Pharmacy, China Pharmaceutical University, Nanjing,  
14 Jiangsu, People's Republic of China

15

16 \* Correspondence:

17 Hong Xue

18 hxue@ust.hk

19

20 Mingqi Qiao

21 qmingqi@163.com

22

## 23 **Abstract**

24 Premenstrual dysphoric disorder (PMDD) affects nearly 5% women of reproductive age. The  
25 symptomatic heterogeneity, along with largely unknown genetics, of PMDD have greatly  
26 hindered its effective treatment. In the present study, 127 Chinese PMDD patients of the  
27 ‘invasion’ and ‘depression’ subtypes clinically differentiated by us earlier were analyzed  
28 together with 108 non-PMDD controls for genome-wide copy number variations (CNVs).  
29 Germline genomic DNA samples from white blood cells were subjected to AluScan  
30 sequencing-based CNV profiling, which enabled clustering of patient samples readily into the  
31 V and D groups, dominated by the “invasion” and “depression” clinical subtypes,  
32 respectively; the CNVs obtained with 100-kb windows yielded two clusters that were  
33 correlated with these subtypes with a consistency of up to 89.8%. Diagnostic correlation- and  
34 frequency-based CNV features of either CNV-gain (CNVG) or CNV-loss (CNVL) that could  
35 differentiate between V and D subtypes were selected and analyzed. CNVG features located  
36 preferentially in S2-phase replicating regions and enriched with steroid hormone biosynthesis  
37 pathway of genes were found protective against PMDD. Moreover, machine learning  
38 employing the correlation-based CNV features could predict with >80% accuracy whether a  
39 genomic sample was D-type, V-type or control. In terms of their CNV profiles, the D- and V-  
40 types differed more from one another than from the controls, thereby providing a genomic  
41 basis for the clinical D-V subtyping of PMDD. Genome-wide profiling of CNVs, as a new  
42 approach to complex disease genetics, has revealed recurrent CNVs and genomic features  
43 beyond individual genes and mutations underlying PMDD clinical diversity.

44

## 45 **Introduction**

46 Premenstrual dysphoric disorder (PMDD) is a syndrome that afflicts 5-10% of women in  
47 their reproductive years (1). The severity of the syndrome is typically highest just before the

48 menstruation period, suggesting that the symptoms were linked to hormonal changes. This  
49 has been confirmed by the findings of premenstrual neurosteroid fluctuations, and alterations  
50 in the sensitivity of GABA<sub>A</sub> receptors to neurosteroids giving rise to mood instability (2, 3).  
51 Cortical gamma-aminobutyric acid (GABA) levels also declined during the menstrual cycle  
52 in healthy women but increased in women with PMDD from the follicular phase to the mid-  
53 luteal and late luteal stages (4). Furthermore, PMDD has been associated with the estrogen  
54 receptor alpha gene *ESR1* (5), and the *ESC/E(Z)* genes affecting the interactions of sex  
55 hormones with other genes (6). Five major contributors to the etiology of PMDD include: (1)  
56 genetic susceptibility; (2) progesterone and its metabolite ALLO; (3) estrogen, serotonin and  
57 brain-derived neurotrophic factor (BDNF); (4) brain structure and function; and (5) the  
58 hypothalamic-pituitary-adrenal axis and hypothalamic-pituitary-gonadal axis (7). The  
59 schizophrenia-associated SNPs in *GABRB2*, located in introns 8 and 9 near an AluYi6  
60 insertion, have been associated with both schizophrenia and bipolar disorder (8, 9), heroin  
61 addiction (10), altruism (11), autism and mental retardation (12). Deletion of *gabbr2* genes  
62 from knockout mice also brought about schizophrenic symptoms that were alleviated by the  
63 antipsychotic Risperidone (13). Recently, analysis of germline copy-number-variations  
64 (CNVs) at the *nsv1177513* site in Exon 11, and the *esv2730987* site in Intron 6, of *GABRB2*  
65 in PMDD and schizophrenia patients showed that CNV alterations at both *esv2730987* and  
66 *nsv1177513* were significantly associated with schizophrenia in Chinese and Germans as  
67 well as PMDD in Chinese (14). Moreover, subjects with different levels of susceptibility to  
68 cancer could be distinguished by means of diagnostic CNV marker features selected from the  
69 germline genomes with the application of machine learning (15).

70

71 It is recognized that the symptoms of PMDD are consistent with multiple clinical subtypes. A  
72 Delphi survey led to the proposal of three symptoms-based types of PMDD, *viz.* a

73 predominantly physical type, a predominantly emotional type, and a mixed type (16); and  
74 DSM-V proposed that PMDD is defined by one or more of the symptoms of marked affective  
75 lability, marked irritability or anger, marked depressed mood and hopelessness, and marked  
76 anxiety and tension, plus at least one of seven other symptoms. At the School of Basic  
77 Medicine, Shandong University of Traditional Chinese Medicine, the medical records also  
78 pointed to at least two major types of PMDD, viz. an irritability-marked ‘invasion’ type  
79 (58.9%) and a depressive mood-marked ‘depression’ type (27.5%) (17). In view of the  
80 spectrum of PMDD symptoms, the objective of the present study was to enquire whether the  
81 two major clinical subtypes of PMDD could be correlated with genomic profiles. Through  
82 genome-wide CNV profiling by AluScan next-generation sequencing (18, 19), the results  
83 revealed two large clusters of CNV profiles that were highly correlated with the clinical  
84 “depression” and “invasion” subtypes. Furthermore, CNV-gain (CNVG) and CNV-loss  
85 (CNVL) features diagnostic of PMDD or each of the two clinical subtypes were uncovered  
86 among CNVs called from sequence windows of different sizes, which were variously  
87 distributed in genomic regions of different replication timing and overlapped with genes in  
88 various genetic pathways of potential clinical relevance. These results provided genomic  
89 verification for the invasion- and depression-subtypes employed by us previously (17), which  
90 corresponded to part of the complex symptoms stipulated by DSM-V (20) as diagnostic  
91 criteria for PMDD.

92

## 93 **Methods**

### 94 **Clinical assessments**

95 Clinical diagnosis of PMDD patients (P-type subjects) from asymptomatic controls (C-type  
96 subjects) was performed in accordance to the protocol in Diagnostic and Statistical Manual of  
97 Mental Disorders (DSM-IV) by two psychiatrists independently. The identifications of

98 ‘depression-type’ and ‘invasion-type’ subjects were carried out as previously described (17).

99

## 100 **Genomic DNA samples**

101 Peripheral white blood cell DNA samples were collected from PMDD patients and non-  
102 PMDD control subjects with approval by the institutional ethic committee of Shandong  
103 University of Chinese Medicine. The patients and healthy volunteers who participated in this  
104 study all signed the informed consent form. The samples consist of a control cohort of 108  
105 subjects and a PMDD cohort of 127 cases. The latter cohort was further divided into the  
106 depression-subtype (71 cases) and invasion-subtype (56 cases). The subtypings of the 127  
107 PMDD cases were given in Table S1.

108

## 109 **AluScan sequencing and CNV calling**

110 Samples of ~0.1µg DNA were subjected to inter-Alu PCR amplification using the four Alu-  
111 consensual primers AluY278T18, AluY66H21, R12A/267 and L12A/8 (18). The 200 bp to  
112 ~6 kb amplicons in each sample were employed to build a library for sequencing on the  
113 Illumina platform with 100 bp paired-end reads. According to the standard framework, all the  
114 reads were mapped to reference human genome hg19 downloaded from UCSC by BWA,  
115 followed by base recalibration and local realignment by GATK (21). CNVs were called from  
116 the AluScan sequences with the method of AluScanCNV2 (19, 22) based on sequence  
117 windows of 50-500 kb in 50-kb increments on the 22 autosomes and the X chromosome. The  
118 CNV profiles of all 108 control and 127 PMDD subjects were available in Table S2.

119

## 120 **Clustering and grouping of patient samples based on CNV profiles**

121 The profiles of CNVG and CNVL called from the 127 P-group samples using different CNV-  
122 calling window sizes were separately subjected to correlation analysis and hierarchical

123 clustering with 1,000 bootstraps using the ‘pvclust’ R package (23). The derived correlation  
124 heatmaps as well as the CNVG-based and CNVL-based dendrograms obtained for each  
125 window size were employed to determine the two subgroups of CNV profiles using two  
126 different grouping methods for cross validation.

127

128 In the first method, *viz.* the straightforward ‘*cutree*’ method, the sub-clustering was carried  
129 out using the ‘*cutree*’ function from the ‘dendextend’ R package (24) to cut each dendrogram  
130 into 2-8 sub-clusters (Figure S1). The DNA samples located in the sub-cluster populated with  
131 the highest number of clinical depression-type samples among all the sub-clusters was  
132 referred as D-type genomic samples; and the DNA samples located in the remaining sub-  
133 clusters were combined and referred as V-type genomic samples. In the second, or ‘*semi-*  
134 *supervised*’ method, some branches on the dendrograms were first rotated around their  
135 respective nodes to bring the closely co-localized samples into tightly knit sub-clusters  
136 enclosed by black square boxes on the diagonal of each heatmap. Thereupon, all the samples  
137 within the same block box were all designated as D-type or V-type genomic samples  
138 depending on whether the majority clinical subtype of the samples were depression-type or  
139 invasion-type. The designated D- and V-type genomic samples derived using the two  
140 grouping methods for ten different window sizes are shown in Table S3 and exemplified by  
141 the blue and red branches in Figure 1 and Figure S2 respectively for the 100-kb CNV profiles.

142

143 For either the ‘*cutree*’ method or the ‘*semi-supervised*’ method, let the number of CNV-based  
144 D-type samples that also belonged to the clinical depression-subtype be represented by  $True_D$ ,  
145 and the number of CNV-based V-type samples that also belonged to the clinical invasion-  
146 subtypes be represented by  $True_V$ . Accordingly, the consistency ( $Y$ ) between CNV-based  
147 classification and the clinical classification of PMDD patient samples could be estimated by:

$$Y = (True_D + True_V)/127$$

148 On this basis, the levels of consistency between CNV-based and clinical subtypings for the  
149 different CNVs called using different window sizes for both the ‘*cutree*’ and ‘*semi-supervised*’  
150 methods are shown in Table S4.

151

### 152 **Selection of diagnostic CNV features**

153 The selection of diagnostic CNV features was performed using either (a) correlation-based  
154 method or (b) frequency-based method as described (15). CfsSubsetEval from the Weka  
155 package was employed together with BestFirst search method to select the correlation-based  
156 diagnostic CNV features. Fisher’s exact tests were employed to select the frequency-based  
157 CNV features that showed significantly different occurrence frequencies between a pair of  
158 sample groups (e.g. P-vs-C or D-vs-V) with a false discovery rate (FDR) less than 0.01.

159

### 160 **Predictive subtyping of genomic samples by machine learning**

161 Earlier, diagnostic germline CN-gains and CN-losses from leucocyte DNA samples of  
162 subjects with or without past episodes of cancers in tissues other than leucocytes were found  
163 to provide a useful basis to predict the propensity of the subject to cancer (15). Since the 127  
164 P-group and 108 C-group DNA samples from PMDD and control subjects consisted of a  
165 mixture of D-type, V-type and C-type DNAs, the question arose whether it was possible to  
166 predict the typing of DNA samples between the D-vs-V, D-vs-C and V-vs-C choices  
167 employing the diagnostic CNVG and CNVL features obtained with the correlation-based  
168 method.

169

170 For example, in a choice between the P-vs-C types, a mixture of P- and C-type samples were  
171 randomly separated into a labeled Learning Band and an unlabeled Test Band, with equal or

172 near equal number of samples in the two bands. Diagnostic CNVG and CNVL features were  
173 selected from the labeled Combined Learning Band with machine learning using the  
174 correlation-based method and employed to estimate the risk factor  $R$  for each DNA sample in  
175 the Test Band according to Eqn. 1.

$$176 \quad R = \log \left( \frac{\Pr(\text{PMDD}|\text{Features})}{\Pr(\text{Control}|\text{Features})} \right) \quad \text{Eqn. 1}$$

$$\Pr(\text{PMDD}|\text{Features}) = \Pr(\text{Features}|\text{PMDD}) \times \Pr(\text{PMDD})/\Pr(\text{Features})$$

$$\Pr(\text{Control}|\text{Features}) = \Pr(\text{Features}|\text{Control}) \times \Pr(\text{Control})/\Pr(\text{Features})$$

177 where  $\Pr(\text{PMDD}|\text{Features})$  was the posterior probability of membership in the PMDD group  
178 given the CNV data of a particular Test Band sample;  $\Pr(\text{Control}|\text{Features})$  was its posterior  
179 probability of membership in the Control group given the same test CNV data;  
180  $\Pr(\text{Features}|\text{PMDD})$  was the likelihood function of the test CNV data given membership in  
181 the PMDD group;  $\Pr(\text{Features}|\text{Control})$  was the likelihood function of the test CNV data  
182 given membership in the Control group;  $\Pr(\text{PMDD})$  and  $\Pr(\text{Control})$  were the prior  
183 distributions of PMDD and Control samples respectively within the Learning Band; and  
184  $\Pr(\text{Features})$  was the prior distribution of CNV-features among all the CNVs within the  
185 Learning Band.

186

187 For every sample in the Test Band, its value of  $R$  estimated using Eqn. 1 would predict  
188 whether the sample belonged to the Control group or PMDD group: it would predictively  
189 belong to Control group (*viz.* ‘non-PMDD’) if  $R < 0$ ; belong to PMDD group if  $R > 0$ ; or no  
190 prediction could be made if  $R = 0$ . For every PMDD sample in the Test Band,  $R > 0$   
191 represented a ‘true’ prediction whereas  $R < 0$  represented a ‘not true’ prediction. On the other  
192 hand, for any Control sample in the Test Band,  $R > 0$  represented a ‘not true’ prediction  
193 whereas  $R < 0$  represented a ‘true’ prediction. Accuracy of prediction was therefore given by:

$$194 \quad \text{Accuracy} = \frac{[\text{True predictions of Control}] + [\text{True predictions of PMDD}]}{[\text{Total predictions of Control}] + [\text{Total predictions of PMDD}]} \times 100\% \quad \text{Eqn. 2}$$



195

196 Repetition of this procedure 1,000 times would yield 1,000 Accuracy estimates, and in turn  
197 the Average Accuracy regarding the P-vs-C typing.

198

### 199 **Functional annotation of genes overlapping with diagnostic CNV features**

200 By comparing the genomic coordinates of all the frequency-based diagnostic CNV features to  
201 those of the known genes retrieved from the R package  
202 ‘TxDb.Hsapiens.UCSC.hg19.knownGene’ version 3.2.2 (25), and considering any gene to be  
203 ‘overlapping’ with a CNV feature if any proportion of its sequence (from > 0% to 100% in 10%  
204 increments) coincided with part or all of the CNV feature, the list of CNV-overlapping genes  
205 obtained was uploaded to DAVID Bioinformatics Resources as a *test-list* employing the  
206 ‘RDAVIDWebService’ R package (26). All the known genes on chromosomes 1-22 and X  
207 were also uploaded as the *background-list*. Comparison of the two lists using the  
208 ‘getFunctionalAnnotationChart’ of the ‘RDAVIDWebService’ R package revealed gene  
209 pathways or categories, as defined in the GO, KEGG and INTERPRO databases, that were  
210 enriched with the *test-list* of genes among the *background-list* of genes. The pathways or  
211 categories yielding <0.05 Benjamini-corrected *p*-values were regarded to be significantly  
212 enriched in the genes on the *test-list* (Table S5).

213

### 214 **Genomic-feature content of diagnostic CNV features in different replication phases**

215 DNA sequences on 22 autosomes and chromosome X were subject to replication-time  
216 segmentation according to Long & Xue (27). Briefly speaking, experiment-assessed  
217 replication timing of all 1-kb sequence windows in the genomes of fifteen human cell lines  
218 were retrieved from the ‘UW Repli-seq track’ in the UCSC Table Browser (28), and the  
219 representative replication phase of each sequence window was identified as one of the six

220 types of sequencing segments (viz. G1b, S1, S2, S3, S4 and G2) based on their experiment-  
221 assessed replication timing in all fifteen human cell lines.

222

223 The density or intensity of genomic features were quantified as described in Ng et al (29) in  
224 the diagnostic CNV features and the non-diagnostic-CNV regions in each type of replication  
225 phase. The genomic feature content of diagnostic CNV features is indicated by the fold  
226 change of the density or intensity of the genomic feature in diagnostic CNV features relative  
227 to the non-diagnostic-CNV regions.

228

### 229 **Statistical analysis**

230 All comparisons of CNV frequencies were conducted using Fisher's exact tests, and the *p*-  
231 values were adjusted by false discovery rate for multiple comparisons. In functional  
232 annotation of genes, *p*-values from DAVID web service were subject to Benjamini-correction  
233 for multiple comparisons. When annotating the genes that overlapped with any diagnostic  
234 CNV feature, empirical *p*-values were estimated using Monte Carlo methods with 1,000  
235 simulations to validate the significant gene pathways/categories based on the 50-, 100- or  
236 450-kb size groups of CNV features. In each round of simulation, sequence windows of the  
237 same size as the targeted group of CNV features were randomly selected from chromosomes  
238 1-22 and X, with the number of selected windows being equal to the average number of CNV  
239 features in the different type-comparisons to be analysed (see Table S6). For each simulation,  
240 the genes that overlapped with any of the selected sequence windows were functionally  
241 annotated. The empirical *p*-value of a targeted pathway was given by  $(r+1)/(n+1)$ , where  $n =$   
242 1,000 and  $r =$  number of simulations that displayed significant enrichment ( $<0.05$  Benjamini-  
243 corrected *p*-values) in the targeted pathway.

244

## 245 **Software for data processing and visualization**

246 Data processing tasks were carried out using custom R codes, except that tasks requiring  
247 machine learning were processed using Weka package. All figures were drawn under R  
248 environment using the ‘ggplot2’ (30), ‘pheatmap’ (31) and ‘quantsmooth’ (32) packages,  
249 except for Figure 3 which was drawn using <http://bioinformatics.psb.ugent.be/webtools/Venn/>,  
250 and Figure 5 using Integrative Genomics Viewer 2.3.69 (33).

251

## 252 **Results**

### 253 **Correlations between clinical diagnosis and CNV profiles**

254 In order to examine whether there might be significant correlation between the clinical  
255 symptoms of PMDD patients and their germline CNV profiles, the CNVGs and CNVLs  
256 called from different sizes of sequence windows on the 127 P-type DNA samples, were  
257 subjected to hierarchical clustering in each instance. The CNVGs and CNVLs called from  
258 100-kb sequence windows of the 71 depression-subtype and 56 invasion-subtype patient  
259 samples were segregated using the cutree and semi-supervised methods into distinct D-type  
260 and V-type clusters in the dendrograms as shown in Figure S2 and Figure 1 respectively. The  
261 clusters obtained from the CNVG dendrograms were designated as  $D_G$  and  $V_G$  clusters, and  
262 the clusters obtained from the CNVL dendrograms were designated as  $D_L$  and  $V_L$  clusters.  
263 Notably, the cutree method yielded 72  $V_G$ -type and 55  $D_G$ -type CNVG profiles with 81.10%  
264 consistency between the invasion-vs-depression clinical classification and the V-vs-D  
265 CNVG-based classification (Figure S2A); whereas the semi-supervised method yielded 61  
266  $V_G$ -type and 66  $D_G$ -type CNVG profiles with 89.76% consistency between the invasion-vs-  
267 depression clinical classification and the V-vs-D CNVG-based classification (Figure 1A).  
268 Therefore, using either the cutree method or the semi-supervised method, the CNVG-based  
269 classification was highly correlated with the clinical symptom-based classification of the

270 PMDD genomes; this was likewise the case with the  $D_L$ -type and  $V_L$ -type CNVLs.  
271 Altogether, for the CNVGs and CNVLs in, the 50-500 kb window sizes, the cutree method  
272 yielded consistencies of 68-91%, and the semi-supervised method yielded consistencies of  
273 88-98%, between the CNV-based and symptom-based classifications. The semi-supervised  
274 classifications of P-type samples based on CNVs called from 50-500 kb window sizes were  
275 available in Figure S3. These results demonstrated that both the CNVGs and CNVLs  
276 contributed to the etiology of the depression-type and the invasion-type symptoms. Moreover,  
277 the comparable results obtained using the cutree and semi-supervised methods confirmed the  
278 robustness of the CNV-symptom correlations. When the CNVGs or CNVLs called from 100-  
279 kb sequence windows of the 108 C-type control samples were subject to hierarchical  
280 clustering along with the P-type samples, ~40% of the C-type CNV profiles formed a tight  
281 sub-cluster and ~60% were dispersely distributed in the dendrogram, forming sub-clusters  
282 with the depression-subtype or invasion-subtype PMDD samples (Figure S4).

283

#### 284 **Use of diagnostic CNV-features for predictive subtyping**

285 The correlation between germline CNV profiles and clinical subtypes of PMDD suggests that  
286 it would be practicable to predict from the germline CNVs of women their propensity to  
287 develop PMDD, as well as the likely subtype of the PMDD clinical condition. Toward this  
288 objective, the method developed earlier by us through the use of diagnostic CNV-features  
289 selected with machine learning to assess a subject's propensity for cancer (15) could be  
290 employed as described in 'Selection of diagnostic CNV features' under Method. Figure 2  
291 shows the diagnostic CNV features selected by either the correlation method or the frequency  
292 method for prediction the propensity of a test subject's germline CNVs for which of the P, C,  
293  $V_G$ ,  $D_G$ ,  $V_L$  and  $D_L$  genomic groups: the P-type and C-type outcomes would be assessed  
294 based on PMDD symptoms;  $V_G$  and  $D_G$  would be based on the distinction between the V and

295 D clusters in the CNVG dendrogram in Figure 1A; and  $V_L$  and  $D_L$  would be based on the  
296 distinction between the V and D clusters in the CNVL dendrogram in Figure 1B. The  
297 diagnostic CNVG and CNVL features selected using the correlation and frequency methods  
298 are given in Table S7.

299

300 Figure 2A shows the sets of diagnostic CNV features selected using the correlation-based  
301 (red triangles) or frequency-based (black circles) method to enable a choice between a pair of  
302 genomic groups. For example, the  $D_G$ -vs-C panel of Figure 2A contained a mixture of 66  $D_G$ -  
303 type samples and 108 C-type samples. The diagnostic CNV features selected from the total of  
304 144 samples by means of either the correlation method (red triangles) or the frequency  
305 method (grey circles) were distributed in a crescent near the y-axis and another crescent near  
306 the x-axis. Accordingly, any DNA sample in the mixture that was enriched with near-y  
307 diagnostic CNV features would be predicted to be endowed with a greater propensity for C-  
308 type over  $D_G$ -type, whereas any DNA sample that was enriched with near-x diagnostic CNV  
309 features would be predicted to be endowed with a propensity for  $D_G$ -type over C-type. In the  
310  $D_G$ -vs-C panel of Figure 2B, diagnostic CNV features selected using the correlated method  
311 was employed to predict the  $D_G$ -vs-C nature in the 174-sample mixture as described under  
312 the ‘Predictive subtyping of genomic samples by machine learning’ section in Methods. After  
313 1,000 trial runs, each with a random partition of the samples into an 87-sample Learning  
314 Band and an 87-sample Test Band, the average prediction accuracy obtained was 83.0%.  
315 Altogether, the seven panels in Figure 2B yielded average prediction accuracies ranging from  
316 81.0% to 88.4%. Interestingly, the list of correlation-based CNV features useful for  
317 differentiating between the propensities toward the D and V subtypes (Table S8) showed that  
318 the CNV features biased in favor of V-type samples were mostly CNVL features (27/42 for

319  $V_G$  and 14/17 for  $V_L$ ). The accuracies of sample-classification predictions derived from the  
320 cutree method are available in Figure S5.

321

322 Favorable diagnostic CNV-features were often shared by more than one PMDD types, as  
323 indicated by the overlaps between the colored circles for the P-vs-C (blue), D-vs-C (red) and  
324 V-vs-C (green) comparisons in the Venn diagrams (Figure 3A and B). A range of CNV  
325 features were shared by all three kinds of circles, suggesting that they represented key CNV  
326 features differentiating between the control and PMDD patient samples (Table S9). Notably  
327 also, in all the panels in Figure 3, there was no CNV feature was shared only by the red  
328 circles for D-vs-C and the green circles for V-vs-C, which suggests that the CNV-features  
329 favoring the D-type genomes differed diametrically from the CNV-features favoring the V-  
330 type genomes. As well, there were more D-favoring CNVG features than CNVL features, but  
331 more V-favoring CNVL features than CNVG features.

332

### 333 **Genome-wide distribution of diagnostic CNV features**

334 In order to have a global view of CNV profiles, the locations and replication timing of all  
335 frequency-based diagnostic CNV features, whether overlapping with any known genes or not,  
336 were plotted on Figure S6. The results showed that the CNV features were widely spread on  
337 all the somatic chromosomes and chromosome X. Chromosomes 4, 13, 18 21 and X were  
338 particularly abundant in CNV features that replicated in the G2 phase. Given the correlation  
339 between the clinical symptom-based typing of PMDD cases and the clustering of germline  
340 diagnostic CNV features, these CNV features could be useful guides in a search for some of  
341 genomic sites underlying PMDD.

342

343 In Figure 4, the distributions of the CNV features among DNA regions replicating at different  
344 cell cycle phases exhibited a number of characteristics: (a) In terms of the number of CNV  
345 features that differed between a pair of CNV-types, the P-vs-C panel (viz. P>C or P<C) gave  
346 rise to the smallest difference, whereas the D-vs-V pair ( $D_G > V_G$  or  $D_G < V_G$ ) gave rise to the  
347 largest difference; (b) the ratio of CNVL features relative to CNVG features (viz. L/G on  
348 chart) that favored the C-type over P-type were 1.32 for 50-kb CNV features, 2.13 for 100-kb  
349 ones and 2.05 for 450-kb ones, all greater than unity (Figure 4A); (c) the P-vs-C comparisons  
350 were suggestive of protective effects of smaller size CNVLs in the early replication phases  
351 and larger CNVLs in the later phases (Figure 4A); (d) the CNVLs captured by 50-kb  
352 windows included significantly more V-favoring than either C-favoring or D-favoring ones  
353 ( $L/G = 2.41$  in Figure 4C and  $1.80$  in Figure 4D); (e) the CNVGs were significantly enriched  
354 in D-favoring features compared to C-favoring or V-favoring ones, whereas CNVLs were  
355 significantly enriched in V-favoring features compared to C-favoring or D-favoring ones; (f)  
356 D-vs-V comparisons suggest that V-type PMDD was correlated with smaller CNVG features  
357 belonging to the early replication phases and large CNVGs belonging to the later phases; (g)  
358 Large CNVG features were enriched in the G2-phase replicating sequences, especially  
359 among the features selected for the D-vs-C and D-vs-V comparisons (see G2-phase columns  
360 marked with red asterisks in Figure 4B and D); (h) More than half of the large G2-phase  
361 CNVG features in the  $C > D_G$  group are identical to those of the  $V_G > D_G$  group, suggesting the  
362 shared genetic variations in G2 phase underlying V and C types; (i) Large CNVL feature  
363 were enriched in S3-phase replicating sequences in the  $C > V_G$  and  $D_G > V_G$  groups but not in  
364 the  $V_G > C$  or  $V_G > D_G$  groups. The replication-phase distributions of CNV features obtained  
365 based on the  $D_L$ - or  $V_L$ -type samples derived from the CNVL dendrogram in Figure 1B were  
366 available in Figure S7.

367

### 368 **Pathways and genes enriched in diagnostic CNV features**

369 A wide range of genes showed sequence overlaps with the frequency-based diagnostic  
370 CNVG and CNVL features of a range of KEGG pathways in PMDD and its subtypes (Table  
371 1) which pointed to their possible contributions to the PMDD disorder, and some major genes  
372 were contained in more than one pathway (Table 2). It was striking that, as indicated in lines  
373 1-5 of Table 2, the control C-type was favored by high frequencies of CNVG features relative  
374 to the diseased P-, D- or V-type, suggesting that a major causal factor of the PMDD disorder  
375 could be decreased levels of the CNVG features overlapping with the steroid hormone  
376 biosynthesis pathway, with the involvement of *CYP*- and *UGT*-genes replicating in phases S2  
377 and S1. As shown in lines 9-17 of Table 2, the C-type and V-type profiles were favored over  
378 the D-type by high frequencies of CNVL features in the *GRI*-genes, which were involved in  
379 pathways of nicotine addiction, circadian entrainment, serotonergic synapse, dopaminergic  
380 synapse and cAMP signaling. The chromosomal sites of these genes and their overlaps with  
381 the 100-kb CNV features are shown in Figure 5.

382

383 The 50-kb CNV features overlapped with the genes in the glutamatergic-synapse, alcoholism,  
384 and systemic lupus erythematosus pathway genes, as well as steroid hormone biosynthesis  
385 pathway genes replicating in S2 and S3 (Table S5). On the other hand, the 450-kb CNV  
386 features overlapped with chemokine signaling pathway genes (Table S5). Because high  
387 regional density of genes could impact on gene annotations by yielding false-positive co-  
388 localizations when a CNV feature incidentally captured a gene cluster belonging to a pathway,  
389 empirical *p*-values based on Monte Carlo simulations were also estimated for the 100-kb  
390 CNV features (Table S10), which provided additional support for some of the pathway in  
391 Table 2 through the elimination of such false positives (see ‘Statistical analysis’ in Methods).

392



### 393 **Genomic features enriched in diagnostic CNV features**

394 Co-localization analysis revealed various associations between 100-kb frequency-based CNV  
395 features and a wide spectrum of genomic features in different replication phases (Table 3 and  
396 Table S11). D versus V differences in genomic feature contents can be identified from the  
397 thermal scale plots of co-localization scores illustrated in Figure 6 and Figure S8. The  
398 genomic features apparently differed between D and V types included: (1) In terms of  
399 retrotransposons, D-favoring CNVG features enriched with more of the subfamily of  
400 evolutionarily very young short transposons SVAef, while V-favoring CNVG and D-favoring  
401 CNVL features enriched with the very young long transposon subfamily, L1vy. (2) With  
402 respect to genetic markers, P-favoring, especially D-favoring CNVL features were enriched  
403 with recombination events as well as genetic variation hotspots and clusters (27). GWAS  
404 reported markers were co-localized with D-favoring CNVGs in S1, V-favoring CNVLs in S4  
405 and C-favoring CNVLs G1b. As well, ClinVar markers were enriched in V-favoring CNVG  
406 of S2 phase and D-favoring CNVL of S1. (3) In respect to the group of CpG-related genomic  
407 features, the main difference between the two types was that D-favoring CNVL features were  
408 more enriched with CpG features such as MeBS in S4 replicating sequences. Compared with  
409 D- and V-favoring, the C-favoring CNV features were more prominently enriched with CpG  
410 features, especially for C-favoring CNVG in S3 and CNVL in G2 and S4 phases. (4) In  
411 regard to non-coding RNA, LINC was enriched in V-favoring CNVL as well as C-favoring  
412 CNV features, but not in D-favoring features. (5) To a lesser extent, the enrichment of histone  
413 binding sites in D-favoring CNVG features of G2 and S2 phases. In contrast, histone sites  
414 were enriched in V-favoring CNVL features of S4 phase. This trend was clearly visible from  
415 Figure 6, where twelve kind histone binding sites were analyzed separately and displayed  
416 side-by-side.

417

418 Some of the strongly enriched genomic features with great than one-fold enrichment was  
419 listed in Table 3. For example, enrichment of DNase I hypersensitive sites (DNase) was  
420 found in C>P CNVL and C>V<sub>L</sub> CNVG features in G2-phase replicating sequences and P>C  
421 (as well as D>C and V>C) CNVL features in S4-phase replicating sequences. Regulatory  
422 elements isolated by formaldehyde (FAIRE) were found to enrich in C>V, D>C and D>V  
423 CNVL features that located in the late-replicating S4 and G2 phases. Disease- or trait-  
424 associated SNPs identified by genome-wide association studies (GWAS) were enriched in  
425 C>V CNVLs in G1b phase, and P>C CNVGs in S1 phase reaching a fold-change of 5.5  
426 relative to non-diagnostic-CNV regions in S1 phase. The C-favoring (C>P and C>D<sub>L</sub>) CNVG  
427 features and C-favoring CNVL (C>P and C>V<sub>G</sub>) features tend to co-localize with CpG  
428 islands (CpGi) in median to late-replicating S3-G2 phases. A range of methylation-related  
429 features (Me450, MeBS, and MeMRE) were found to enrich in C-favoring CNVG features  
430 mainly in early to median G1b-S3 phases, and C-favoring CNVL features in late-replicating  
431 S4-G2 phases. Long intergenic non-coding RNAs (LINC) were found to be enriched in C-  
432 favoring CNVGs mainly in S2 phase or CNVLs mainly in G2 phase, D-favoring CNVGs in  
433 G1b phase, and V-favoring CNVLs in S3-G2 phases.

434

## 435 **Discussion**

436 Application of either the cutree method or the semi-supervised method to the hierarchically  
437 clustered CNVGs or CNVLs in the germline genomes of PMDD subjects enabled the  
438 distinction between the D-type and V-type CNV profiles. The high degree of consistency  
439 between the clinical depression-subtype and D-type CNV profiles, and between the clinical  
440 invasion-subtype and V-type CNV profiles, indicated that the two clinical PMDD subtypes  
441 were intrinsically correlated with the two dissimilar types of CNV profiles. This was further  
442 conformed when diagnostic CNVG and CNVL features were selected by means of machine

443 learning using the correlation method, and employed as abundance markers to predict  
444 whether a given germline genomic sample belonged to the control group, the PMDD group,  
445 the V-type CNV group or the D-type CNV group, yielding average accuracies of prediction  
446 of 81.0-88.4% (Figure 3), which in turn validated the use of diagnostic CNVG and CNVL  
447 features to identify the genes and pathways that overlapped with such diagnostic features as  
448 potential contributors to the PMDD disorder.

449

450 In this regard, there exists overall accord between the cutree and the semi-supervised  
451 methods in terms of diagnostic CNV features identified, replication-phase distribution and  
452 pathway enrichments (Table S5, S12 and S13). As indicated in DSM-V, PMDD is defined by  
453 a complex system of symptoms. In the present study, limited data allowed the analysis of  
454 only the depression-type and invasion-type symptoms. Nevertheless, the Venn diagrams in  
455 Figure 3 clearly showed that the CNVs underlying the D-type and V-type CNV profiles were  
456 strikingly more divergent from one another than their separate divergences from the CNVs  
457 underlying the C-type. This finding was also consistent with the results in Figure 2A, which  
458 showed that there were more correlation-based or frequency-based CNV features that could  
459 be employed to distinguish between  $D_G$ -vs- $V_G$  or  $D_L$ -vs- $V_L$  compared to CNV-features that  
460 could distinguish between  $D_G$ -vs-C,  $V_G$ -vs-C,  $D_L$ -vs-C or  $V_L$ -vs-C. As well, the mixed  
461 distribution of control CNV profiles among depression- or invasion-type CNV profiles  
462 (Figure S3) indicated that the difference between the CNVs in the two subtypes of PMDD  
463 was larger than their individual differences from the control. This surprising genome  
464 condition, as illustrated in Figure 7, raises the question of whether the depression-type and  
465 invasion-type conditions of PMDD might represent two distinct clinical disorders.

466

467 A faithful temporal order of DNA replication is fundamental to normal cellular function, and

468 aberrant replication timings were observed in complex diseases including cancers (34, 35).  
469 Accordingly, the relative abundances of diagnostic CNVG and CNVL features among  
470 genomic DNA sequence regions preferentially replicating in each one of the six phases of cell  
471 cycle, namely G1b, S1, S2, S3, S4 and G2 were examined in Figure 4. The peaks of C-  
472 favoring CNVL features in P-vs-C comparisons (downward hollow green bars in Figure 4A)  
473 shifted clearly from the early S1 phase among the 50-kb features to the late G2 phase among  
474 the 450-kb features, pointing to the enrichment of some small CNVL features in the early-  
475 replicating regions and larger CNVL features in the late-replicating regions among the  
476 determinants of the C-type, *viz.* in the prevention of PMDD occurrence. As well, more D-  
477 favoring CNVG features were located in G2-replicating sequences compared to genomic  
478 DNA sequences replicating in other cell-cycle phases within the D>C and D>V groups,  
479 which was particularly notable in view of the enrichment of G2 phase-replicating sequences  
480 in non-coding sequences (27, 29). In addition, the abundance of V-favoring 50-kb CNVL  
481 features in the V>C and V>D comparisons (Figure 4B and D) suggests that small-size  
482 CNVLs also played important roles in the development of V-type PMDD.

483

484 When diagnostic CNVs were analyzed for their genomic feature enrichment with reference to  
485 replication phases, interesting observations were obtained (Figure 6; Table 3). It has been  
486 revealed that the late-replicating S4-G2 phases in the gene-distal zones are found to be  
487 depleted of functional genomic features (27). However, the present study observed  
488 associations of open chromatin signals, regulatory elements and epigenetic regulation sites  
489 with the diagnostic CNV features in these late-replicating sequences (Table 3), indicating that  
490 the diagnostic CNV features might represent pivotal genomic sites in the late-replicating  
491 sequences that sequence alterations may give raise to functional perturbations underlying  
492 PMDD and its two subtypes. As illustrated herein, genomic feature content analysis,

493 implemented with replication phase information, has pointed to the likelihood of genomic  
494 events underlying the subtyping of PMDD and hence a genomic nature of the disorder and its  
495 clinical diversity. Since genomic features included in the analysis were broad in spectrum and  
496 well beyond the boundary of known genes, the feature enrichment analysis performed herein  
497 may complement with and surpass genetic pathway analysis as a powerful tool for genomic  
498 studies on complex traits and disorders.

499

500 Previously, a number of genes was proposed to be PMDD susceptible genes, including those  
501 of steroid hormone biosynthesis (2, 3), and estrogen signaling (36, 37), and these proposals  
502 were supported by the presence of these genes in Table 1. The overlaps of genes of nicotine  
503 addiction, glutamatergic synapses, olfactory transduction, alcoholism, systemic lupus  
504 erythematosus, hypogonadism, premature ovarian failure, and breast cancer with PMDD  
505 might be suggestive of hitherto hidden aspects of central nervous system or endocrine system  
506 involvements with PMDD. The *GRIA4* gene, overlapping with the 100-kb CNV features for  
507 the C>D and V>D comparisons, groups, has also been found to be associated with  
508 schizophrenia (38), in accordance with the shared CNVs between schizophrenia and PMDD  
509 (14).

510

511 In conclusion, through CNV profiling, the present study provided evidence for strong  
512 correlation of the clinical depression-subtype or invasion-subtype with the D-type and V-type  
513 germline genomes, marked by the overlaps between their CNVs and the machine-selected  
514 diagnostic CNV features that favored one or another type of genomes. On account of this  
515 correlation, the diagnostic CNV features could be employed as frequency markers to predict  
516 the propensity to PMDD and one of its clinical subtypes, as well as position markers to  
517 identify candidate PMDD genes and pathways. Moreover, the genetic difference between the

518 depression-favoring and invasion-favoring CNV profiles was found to exceed their individual  
519 divergences from the normal controls (Figure 7), raising the question of how this outcome  
520 might have been evolved. Future studies will be required to determine how many of the array  
521 of PMDD symptoms besides the depression-subtype and invasion-subtype ones could be  
522 significantly correlated with CNVs, and what complex diseases other than PMDD would  
523 embody CNV-symptom correlations as strong as those encountered with PMDD.

524

## 525 **Acknowledgements**

526 We thank Ms. Peggy Lee for the technical support. The study was supported by grants to HX  
527 from University Grants Council (SRF116SC01; UROP18SC06; UROP20SC07) and  
528 Innovation Technology Council (ITS/085/10; ITS113/15FP; ITCPD/17-9; ITT/023/17GP;  
529 ITT/026/18GP) of Hong Kong SAR; Shenzhen Municipal Council of Science and  
530 Technology, Guangdong (JCYJ20170818113656988); Shandong Province First Class  
531 Disciple Development Grant and Tai-Shan Scholar Program, Shandong; and Ministry of  
532 Science and Technology (National Science and Technology Major Project, No.  
533 2017ZX09301064), People's Republic of China, as well as grants from National Natural  
534 Science Foundation of China to MQ (No. 8157151623) and JW (No. 81603510), respectively.

535

## 536 **Conflict of Interest**

537 The authors declare that the research was conducted in the absence of any commercial or  
538 financial relationships that could be construed as a potential conflict of interest.

539

## 540 **Author Contributions**

541 HX and MQ conceived and designed the experiments, ZW, XLo, AU, SC and WM performed  
542 the AluScan sequencing related experiments and analysis of the sequencing data. PS, MG, JW,

543 HW, XLi, WS and MQ coordinated the collection of PMDD and control cohorts, and HX,  
544 ZW, XLo, SC and MQ wrote the paper.

545

## 546 **Supplementary Information**

547 Supplementary materials are available online, including Figures S1-S8 and Table S1-S15.

548

## 549 **References**

- 550 1. Cohen LS, Soares CN, Otto MW, Sweeney BH, Liberman RF, Harlow BL. (2002):  
551 Prevalence and predictors of premenstrual dysphoric disorder (PMDD) in older  
552 premenopausal women - The Harvard Study of Moods and Cycles. *J Affect Disorders*.  
553 70(2):125-132.
- 554 2. Smith SS, Ruderman Y, Frye C, Homanics G, Yuan M. (2006): Steroid withdrawal in  
555 the mouse results in anxiogenic effects of 3alpha,5beta-THP: a possible model of  
556 premenstrual dysphoric disorder. *Psychopharmacology (Berl)*. 186(3):323-333.
- 557 3. Turkmen S, Backstrom T, Wahlstrom G, Andreen L, Johansson IM. (2011):  
558 Tolerance to allopregnanolone with focus on the GABA-A receptor. *Br J Pharmacol*.  
559 162(2):311-327.
- 560 4. Epperson CN, Haga K, Mason GF, Sellers E, Gueorguieva R, Zhang W, et al. (2002):  
561 Cortical gamma-aminobutyric acid levels across the menstrual cycle in healthy  
562 women and those with premenstrual dysphoric disorder: a proton magnetic resonance  
563 spectroscopy study. *Arch Gen Psychiatry*. 59(9):851-858.
- 564 5. Huo L, Straub RE, Roca C, Schmidt PJ, Shi K, Vakkalanka R, et al. (2007): Risk for  
565 premenstrual dysphoric disorder is associated with genetic variation in ESR1, the  
566 estrogen receptor alpha gene. *Biol Psychiatry*. 62(8):925-933.

- 567 6. Dubey N, Hoffman JF, Schuebel K, Yuan Q, Martinez PE, Nieman LK, et al. (2017):  
568 The ESC/E(Z) complex, an effector of response to ovarian steroids, manifests an  
569 intrinsic difference in cells from women with premenstrual dysphoric disorder. *Mol*  
570 *Psychiatry*. 22(8):1172-1184.
- 571 7. Raffi ER, Freeman MP. (2017): The etiology of premenstrual dysphoric disorder: 5  
572 interwoven pieces. *Current Psychiatry*. 16(9):20-28.
- 573 8. Lo WS, Lau CF, Xuan Z, Chan CF, Feng GY, He L, et al. (2004): Association of  
574 SNPs and haplotypes in GABAA receptor beta2 gene with schizophrenia. *Mol*  
575 *Psychiatry*. 9(6):603-608.
- 576 9. Chen J, Tsang SY, Zhao CY, Pun FW, Yu Z, Mei L, et al. (2009): GABRB2 in  
577 schizophrenia and bipolar disorder: disease association, gene expression and clinical  
578 correlations. *Biochem Soc Trans*. 37(Pt 6):1415-1418.
- 579 10. Kim YS, Yang M, Mat WK, Tsang SY, Su ZH, Jiang XF, et al. (2015): GABRB2  
580 Haplotype Association with Heroin Dependence in Chinese Population. *PLoS One*.  
581 10(11).
- 582 11. Tsang SY, Zhong SF, Mei LL, Chen JH, Ng SK, Pun FW, et al. (2013): Social  
583 Cognitive Role of Schizophrenia Candidate Gene GABRB2. *PLoS One*. 8(4).
- 584 12. Lew AR, Kellermayer TR, Sule BP, Szigeti K. (2018): Copy Number Variations in  
585 Adult-onset Neuropsychiatric Diseases. *Curr Genomics*. 19(6):420-430.
- 586 13. Yeung RK, Xiang ZH, Tsang SY, Li R, Ho TYC, Li Q, et al. (2018): GABRB2  
587 knockout mice displayed schizophrenia-like and comorbid phenotypes with  
588 interneuron-astrocyte-microglia dysregulation. *Transl Psychiatry*. 8:128.



- 589 14. Ullah A, Long X, Mat WK, Hu T, Khan MI, Hui L, et al. (2020): Highly recurrent  
590 copy number variations in GABRB2 associated with schizophrenia and premenstrual  
591 dysphoric disorder. *Front Psychiatry*. 11:572.
- 592 15. Ding X, Tsang SY, Ng SK, Xue H. (2014): Application of machine learning to  
593 development of copy number variation-based prediction of cancer risk. *Genomics  
594 Insights*. 7:1-11.
- 595 16. Ismail KM, Nevatte T, O'Brien S, Paschetta E, Backstrom T, Dennerstein L, et al.  
596 (2013): Clinical subtypes of core premenstrual disorders: a Delphi survey. *Arch  
597 Womens Ment Health*. 16(3):197-201.
- 598 17. Qiao M, Sun P, Wang H, Wang Y, Zhan X, Liu H, et al. (2017): Epidemiological  
599 distribution and subtype analysis of premenstrual dysphoric disorder syndromes and  
600 symptoms based on TCM theories. *Biomed Res Int*. 2017:4595016.
- 601 18. Mei L, Ding X, Tsang SY, Pun FW, Ng SK, Yang J, et al. (2011): AluScan: a method  
602 for genome-wide scanning of sequence and structure variations in the human genome.  
603 *BMC Genomics*. 12:564.
- 604 19. Yang JF, Ding XF, Chen L, Mat WK, Xu MZ, Chen JF, et al. (2014): Copy number  
605 variation analysis based on AluScan sequences. *J Clin Bioinforma*. 4(1):15.
- 606 20. American Psychiatric Association. (2013): Diagnostic and statistical manual of  
607 mental disorders (Fifth Edition, DSM-5™). American Psychiatric Publishing,  
608 Washington, DC and London England. p. 171-174.
- 609 21. McKenna A, Hanna M, Banks E, Sivachenko A, Cibulskis K, Kernytsky A, et al.  
610 (2010): The Genome Analysis Toolkit: a MapReduce framework for analyzing next-  
611 generation DNA sequencing data. *Genome Res*. 20(9):1297-1303.

- 612 22. Hu T, Chen S, Ullah A, Xue H. (2019): AluScanCNV2: An R package for copy  
613 number variation calling and cancer risk prediction with next-generation sequencing  
614 data. *Genes Dis.* 6(1):43-46.
- 615 23. Suzuki R, Shimodaira H. pvclust: Hierarchical Clustering with P-Values via  
616 Multiscale Bootstrap Resampling. R package version 2.0-0. ed2015.
- 617 24. Galili T. (2015): dendextend: an R package for visualizing, adjusting and comparing  
618 trees of hierarchical clustering. *Bioinformatics.* 31(22):3718-3720.
- 619 25. Carlson M, Maintainer BP. (2015): TxDb.Hsapiens.UCSC.hg19.knownGene:  
620 Annotation package for TxDb object(s).
- 621 26. Fresno C, Fernandez EA. (2013): RDAVIDWebService: a versatile R interface to  
622 DAVID. *Bioinformatics.* 29(21):2810-2811.
- 623 27. Long X, Xue H. (2020): Genetic-variant hotspots and hotspot clusters in the human  
624 genome facilitating adaptation while increasing instability. *bioRxiv* doi:  
625 <https://doi.org/10.1101/2020.10.16.342188>.
- 626 28. Hansen RS, Thomas S, Sandstrom R, Canfield TK, Thurman RE, Weaver M, et al.  
627 (2010): Sequencing newly replicated DNA reveals widespread plasticity in human  
628 replication timing. *Proc Natl Acad Sci U S A.* 107(1):139-144.
- 629 29. Ng SK, Hu T, Long X, Chan CH, Tsang SY, Xue H. (2016): Feature co-localization  
630 landscape of the human genome. *Sci Rep.* 6:20650.
- 631 30. Wickham H. ggplot2: Elegant Graphics for Data Analysis. Springer-Verlag New  
632 York; 2009.
- 633 31. Kolde R. pheatmap: Pretty Heatmaps. 2015.

- 634 32. Oosting J, Eilers P, Menezes R. quantsmooth: Quantile smoothing and genomic  
635 visualization of array data. 2014.
- 636 33. Robinson JT, Thorvaldsdottir H, Winckler W, Guttman M, Lander ES, Getz G, et al.  
637 (2011): Integrative genomics viewer. *Nat Biotechnol.* 29(1):24-26.
- 638 34. Macheret M, Halazonetis TD. (2018): Intragenic origins due to short G1 phases  
639 underlie oncogene-induced DNA replication stress. *Nature.* 555(7694):112-116.
- 640 35. Watanabe Y, Maekawa M. (2010): Spatiotemporal regulation of DNA replication in  
641 the human genome and its association with genomic instability and disease. *Curr Med*  
642 *Chem.* 17(3):222-233.
- 643 36. Huo L, Straub RE, Roca C, Schmidt PJ, Shi K, Vakkalanka R, et al. (2007): Risk for  
644 premenstrual dysphoric disorder is associated with genetic variation in ESR1, the  
645 estrogen receptor alpha gene. *Biol Psychiat.* 62(8):925-933.
- 646 37. Dubey N, Hoffman JF, Schuebel K, Yuan Q, Martinez PE, Nieman LK, et al. (2017):  
647 The ESC/E(Z) complex, an effector of response to ovarian steroids, manifests an  
648 intrinsic difference in cells from women with premenstrual dysphoric disorder. *Mol*  
649 *Psychiatr.* 22(8):1172-1184.
- 650 38. Makino C, Fujii Y, Kikuta R, Hirata N, Tani A, Shibata A, et al. (2003): Positive  
651 association of the AMPA receptor subunit GluR4 gene (GRIA4) haplotype with  
652 schizophrenia: linkage disequilibrium mapping using SNPs evenly distributed across  
653 the gene region. *Am J Med Genet B Neuropsychiatr Genet.* 116B(1):17-22.

654

## 655 **Figure Legends**

656 **Figure 1. Hierarchical clustering of PMDD samples based on their pairwise similarities**  
657 **in genome wide CNV profiles.** For all 127 P-group samples, all CNVs were identified from

658 AluScan sequencing data with 100-kb non-overlapping scanning windows across the genome  
659 and used in the plots of similarity scores for CNVGs (A) and CNVL (B), respectively. The  
660 dendrograms on top of the heat maps were bootstrapped 1,000 times. The color of each  
661 square in the heat map indicates the correlation coefficient ( $r$ ) of a pair of samples according  
662 to the blue-red thermal scale. The semi-supervised classification of samples based on (A)  
663 CNVGs and (B) CNVLs was indicated by the red dendrogram branches for V-type and blue  
664 ones for D-type genomes. The bands below the dendrograms and on the left-hand side of the  
665 heat maps portrayed the subtyping of PMDD samples based on clinical symptoms, with  
666 purple bands representing the clinically determined invasion subtype ( $n = 56$ ) and orange  
667 bands the depression subtype ( $n = 71$ ). Each of the square diagonal boxes in panels (A) and  
668 (B) enclosed a group of genomes with close correlations between each other in the group,  
669 such that they could be identified as a coherent block of genomes belonging to either the V-  
670 type or D-type CNV profiles depending on their enrichment in the invasion- or depression-  
671 subtype samples (see ‘Clustering of patient samples based on CNV profiles’ in Methods).  
672 Comparable heat maps obtained using sequence window sizes of 50 to 500 kb for CNV-  
673 calling are shown in Figure S3.

674

675 **Figure 2. Occurrence frequencies of diagnostic CNV features and their prediction**  
676 **accuracies for seven pairs of sample groups.** Panel (A) shows the frequency distribution of  
677 diagnostic CNV features for different pairs of sample groups. The x-axis represents the  
678 frequency of CNVs in the first-named group (Group 1 as shown on x-axis), and y-axis the  
679 frequency of CNVs in the second-named group (Group 2 as shown on y-axis) in a given pair  
680 of sample groups. Diagnostic CNV features with higher frequencies in Group 1 relative to  
681 Group 2 (located in lower right crescent) are referred to as ‘Group 1-favoring’ features,  
682 whereas diagnostic CNV features with higher frequencies in Group 2 relative to Group 1

683 (located in upper left crescent) are ‘Group 2-favoring’ features. Black circles are CNV  
684 features selected using the frequency-based method with FDR < 0.01 (Fisher’s exact tests),  
685 and red triangles are CNV features selected using the correlation-based method. Panel (B)  
686 shows the prediction accuracies (estimated using Eqn.2 in Methods) of sample classification  
687 in seven sample-pairs based on CNV features selected using the correlation method. For each  
688 of the seven pairs, prediction accuracy was estimated 1,000 times and the average accuracy  
689 (Av.) was given in the pertinent panel. Subscript G denotes that the D- or V-type samples  
690 were derived from the dendrogram of CNVGs (Figure 1A), while subscript L denotes that the  
691 D- or V-type samples were derived from the dendrogram of CNVLs (Figure 1B).

692

693 **Figure 3. Overlaps between the diagnostic CNV features differentiating the two**  
694 **subtypes of PMDD collectively and individually from the control.** CNV features identified  
695 using (A) correlation-based method, and (B) frequency-based method. Circled ‘G’ indicates  
696 CNVG features and circled ‘L’ indicates CNVL features. The ‘>’ and ‘<’ signs portray the  
697 relative frequencies of the CNV features for a pair of sample groups, e.g. P>C represents  
698 diagnostic CNV features that occurred in higher frequencies in P-group compared to C-  
699 group. Subscript G denotes that the D- or V-type samples were derived from the CNVG  
700 dendrogram in Figure 1A, whereas subscript L denotes that the D- or V-type samples were  
701 derived from the CNVL dendrogram in Figure 1B.

702

703 **Figure 4. Distribution of frequency-based diagnostic CNV features among genomic**  
704 **sequences of different DNA replication phases.** Number of base pairs of the CNV features  
705 called using 50, 100 and 450-kb windows for (A) P-vs-C, (B) D<sub>G</sub>-vs-C, (C) V<sub>G</sub>-vs-C, and (D)  
706 D<sub>G</sub>-vs-V<sub>G</sub> groups. The solid bars represent CNVG features and hollow bars represent CNVL  
707 features in each panel. The replication phases G1b to G2 are color coded as shown. The ‘>’ or

708 ‘<’ sign portrays larger or smaller frequencies of the CNV features in favor of the first-named  
709 group over the second-named one. L/G represents the ratio of the number of CNVLs over the  
710 number of CNVGs. Significant enrichment of CNV features in a particular replication phase  
711 in the genome is indicated by asterisks that are color coded according to the replication  
712 phase, or in black asterisks for comparison between an L/G value in the upper half of a panel  
713 and an L/G value in the lower half (Bonferroni-corrected, \*\*\*  $p < 0.005$ , \*\*  $p < 0.01$ , \*  $p <$   
714  $0.05$ ). Numerical  $p$ -values are shown in Table S14. Subscript G denotes that the D- or V-type  
715 samples were derived from the CNVG dendrogram in Figure 1A. See Figure S7 for the  
716 results obtained based on the D- or V-type samples derived from the CNVL dendrogram in  
717 Figure 1B.

718

719 **Figure 5. Selected genes overlapping with frequency-based diagnostic CNV features.**

720 Expanded views of chromosomal segments on (A) chromosomes 2 and 7 for steroid  
721 biosynthesis pathway genes, (B) chromosomes 5, 11, 12, 16 and 17 for *GRI*-genes of the  
722 glutamatergic synapse and nicotine addiction pathways, and (C) chromosomes 6 and X for  
723 the non-pathway *TRERFI* and *POFIB* genes with color-coded representation of the DNA  
724 replication phase in the ‘Phase’ track, and aligned gene sequence(s) in blue (e.g. *UGT1A8* or  
725 *TRERFI*) as described in RefSeq Genes in UCSC Genome Browser. Green rectangular boxes  
726 either below the genes indicate the presence of diagnostic CNVG or CNVL feature(s). Inside  
727 each box, colored stripes are indicative of CNVL features(s), and solid coloring is indicative  
728 of CNVG features(s): purple for predominantly V-favoring features, orange for D-favoring  
729 features, and green for C-favoring features.

730

731 **Figure 6. Enrichment analysis of genomic-feature contents in different replication**  
732 **phases for control and PMDD subtypes.** Frequency-based CNV features diagnostic for C

733 group, i.e., control, as well as that for D and C groups of PMDD samples clustered by CNVG  
734 dendrogram, identified with 100-kb scanning windows, were used in the analysis.  
735 Enrichment analysis results were plotted for CNVG features in the upper two panels and that  
736 for CNVL features in the bottom two panels. A similar analysis performed in parallel for  
737 clustered by CNVL dendrogram can be found in Figure S8. Fold-change of each genomic  
738 feature in the diagnostic CNV features relative to the non-diagnostic-CNV regions was  
739 estimated according to ‘Genomic-feature content of diagnostic CNV features in different  
740 replication phases’ in Methods, and was color-coded based on the thermal scale. Fold-change  
741 greater than 2-fold was capped at 2 in the heat map. ‘Group 1’ indicated the first-named  
742 group and ‘Group 2’ the second-named group in a given pair of samples. Genomic features  
743 were grouped into Retrotransposon (SVAef, SVAcd, SVAab, AluYvy, AluYys, AluS, AluJ,  
744 FLAM, L1vy, L1y, L1m, L1o, MIR, L2), Genetic markers (RecD, RecH, RecK, GWAS,  
745 ClinVar, GV hotspot, Cluster, CNVG), Regulatory sites (H3k27me3, H4k20me1, H3k9me1,  
746 H2az, H3k79me2, H3k36me3, H3k4me3, H3k9ac, H3k4me2, H3k27ac, H3k4me1, H3k9me3,  
747 MeMRE, MeDIP, MeBS, CpGi, CpGe, Me450, TFBS, REG, FAIRE, DNase) and  
748 Gene/Transcription (Gene, EXPS, LRNA+, LRNA-, LINC) groups on the x-axis based on  
749 their sequence and functional properties. The descriptions of genomic features and numeric  
750 data were available in Table S11.

751

752 **Figure 7. Genetic distances between the two subtypes of PMDD and the control.**

753 Pairwise distances were estimated based on the abundance of diagnostic CNV features  
754 between C-, D- and V-type genomes. The numbers of frequency-based CNV features were  
755 employed as an approximate index of the genetic distance between the D-vs-C, V-vs-C or D-  
756 vs-V sample pairs in Table S15, which comprised the 50-500 kb frequency-based CNV

757 features. Notably, the D-vs-V distance was larger than the D-vs-C distance or the V-vs-C  
758 distance.



**Table 1.** Selected genes overlapping with 100-kb frequency-based CNVG and CNVL features<sup>1</sup> with adjusted *p*-values less than 0.01.

| Gene                                                                                   | Ratio                           | H% <sup>2</sup> | L% <sup>3</sup> | CNV | CNV location<br>(x 100 kb) <sup>4</sup> | <i>p</i> -value <sup>5</sup> | CNV in replication phase (%) <sup>6</sup> |     |    |    |     |     |
|----------------------------------------------------------------------------------------|---------------------------------|-----------------|-----------------|-----|-----------------------------------------|------------------------------|-------------------------------------------|-----|----|----|-----|-----|
|                                                                                        |                                 |                 |                 |     |                                         |                              | G1b                                       | S1  | S2 | S3 | S4  | G2  |
| <b>GABA<sub>A</sub> Receptor Family</b> (KEGG: Nicotine addiction)                     |                                 |                 |                 |     |                                         |                              |                                           |     |    |    |     |     |
| <i>GABRR1, 2</i>                                                                       | C > D <sub>G</sub>              | 26              | 2               | L   | 6:899-900                               | 2.05E-04                     | 0                                         | 0   | 99 | 0  | 0   | 0   |
| <i>GABRG3</i>                                                                          | C > D <sub>G</sub>              | 61              | 27              | L   | 15:275-276                              | 5.55E-04                     | 0                                         | 0   | 0  | 0  | 0   | 100 |
| <i>GABRG3</i>                                                                          | V <sub>G</sub> > D <sub>G</sub> | 59              | 27              | L   | 15:275-276                              | 3.46E-03                     | 0                                         | 0   | 0  | 0  | 0   | 100 |
| <b>Glutamate Metabotropic Receptor</b> (KEGG: Glutamatergic synapse)                   |                                 |                 |                 |     |                                         |                              |                                           |     |    |    |     |     |
| <i>GRM4</i>                                                                            | D <sub>L</sub> > V <sub>L</sub> | 80              | 51              | L   | 6:339-340                               | 6.99E-03                     | 0                                         | 87  | 0  | 0  | 0   | 0   |
| <i>GRM8</i>                                                                            | D <sub>L</sub> > V <sub>L</sub> | 91              | 45              | L   | 7:1,267-1,268                           | 1.08E-06                     | 0                                         | 0   | 0  | 37 | 45  | 0   |
| <i>GRM5</i>                                                                            | V <sub>G</sub> > D <sub>G</sub> | 16              | 0               | L   | 11:882-883                              | 3.98E-03                     | 0                                         | 90  | 0  | 0  | 0   | 0   |
| <b>Glutamate Ionotropic Receptor</b> (KEGG: Glutamatergic synapse, Nicotine addiction) |                                 |                 |                 |     |                                         |                              |                                           |     |    |    |     |     |
| <i>GRIA1</i>                                                                           | V <sub>G</sub> > D <sub>G</sub> | 31              | 0               | L   | 5:1,530-1,531                           | 6.10E-06                     | 0                                         | 0   | 0  | 12 | 78  | 0   |
| <i>GRIK2</i>                                                                           | V <sub>G</sub> > D <sub>G</sub> | 16              | 0               | L   | 6:1,025-1,026                           | 3.29E-03                     | 0                                         | 0   | 0  | 0  | 0   | 100 |
| <i>GRIA4</i>                                                                           | V <sub>G</sub> > D <sub>G</sub> | 25              | 3               | L   | 11:1,057-1,058                          | 3.98E-03                     | 0                                         | 0   | 0  | 0  | 100 | 0   |
| <i>GRIN2B</i>                                                                          | V <sub>G</sub> > D <sub>G</sub> | 23              | 0               | L   | 12:138-139                              | 2.56E-04                     | 0                                         | 0   | 0  | 0  | 100 | 0   |
| <i>GRIN2A</i>                                                                          | V <sub>G</sub> > D <sub>G</sub> | 39              | 6               | L   | 16:98-99                                | 1.61E-04                     | 0                                         | 0   | 0  | 77 | 16  | 0   |
| <i>GRIN2A</i>                                                                          | V <sub>G</sub> > D <sub>G</sub> | 26              | 5               | L   | 16:99-100                               | 6.84E-03                     | 0                                         | 0   | 0  | 94 | 0   | 0   |
| <i>GRIN2C</i>                                                                          | V <sub>G</sub> > D <sub>G</sub> | 39              | 12              | L   | 17:728-729                              | 4.36E-03                     | 3                                         | 92  | 0  | 0  | 0   | 0   |
| <b>UDP Glucuronosyltransferase 1 Family</b> (KEGG: Steroid hormone biosynthesis)       |                                 |                 |                 |     |                                         |                              |                                           |     |    |    |     |     |
| <i>UGT1A1, 3-10</i>                                                                    | V <sub>L</sub> > D <sub>L</sub> | 36              | 11              | L   | 2:2,346-2,347                           | 6.62E-03                     | 0                                         | 0   | 98 | 0  | 0   | 0   |
| <b>Cytochrome P450</b> (KEGG: Steroid hormone biosynthesis)                            |                                 |                 |                 |     |                                         |                              |                                           |     |    |    |     |     |
| <i>CYP3A4, 5, 7</i>                                                                    | C > D <sub>G</sub>              | 30              | 5               | G   | 7:993-994                               | 3.05E-04                     | 0                                         | 100 | 0  | 0  | 0   | 0   |
| <i>CYP3A4, 5, 7</i>                                                                    | C > D <sub>L</sub>              | 30              | 9               | G   | 7:993-994                               | 6.15E-03                     | 0                                         | 100 | 0  | 0  | 0   | 0   |
| <i>CYP3A4, 5, 7</i>                                                                    | V <sub>L</sub> > D <sub>L</sub> | 55              | 9               | G   | 7:993-994                               | 6.37E-07                     | 0                                         | 100 | 0  | 0  | 0   | 0   |
| <i>CYP11B1, 2</i>                                                                      | V <sub>L</sub> > D <sub>L</sub> | 19              | 0               | G   | 8:1,439-1,440                           | 6.55E-04                     | 0                                         | 1   | 68 | 0  | 0   | 0   |
| <i>CYP11A1</i>                                                                         | V <sub>L</sub> > D <sub>L</sub> | 51              | 22              | L   | 15:746-747                              | 7.80E-03                     | 100                                       | 0   | 0  | 0  | 0   | 0   |
| <b>Premature Ovarian Failure Protein 1B</b>                                            |                                 |                 |                 |     |                                         |                              |                                           |     |    |    |     |     |
| <i>POF1B</i>                                                                           | C > P                           | 29              | 9               | G   | X:845-846                               | 2.13E-03                     | 0                                         | 0   | 0  | 0  | 6   | 92  |
| <i>POF1B</i>                                                                           | C > D <sub>G</sub>              | 29              | 0               | G   | X:845-846                               | 2.19E-06                     | 0                                         | 0   | 0  | 0  | 6   | 92  |
| <i>POF1B</i>                                                                           | V <sub>G</sub> > D <sub>G</sub> | 18              | 0               | G   | X:845-846                               | 1.20E-03                     | 0                                         | 0   | 0  | 0  | 6   | 92  |
| <i>POF1B</i>                                                                           | D <sub>G</sub> > C              | 23              | 5               | G   | X:846-847                               | 2.94E-03                     | 0                                         | 0   | 0  | 0  | 0   | 100 |
| <i>POF1B</i>                                                                           | D <sub>G</sub> > V <sub>G</sub> | 23              | 2               | G   | X:846-847                               | 1.67E-03                     | 0                                         | 0   | 0  | 0  | 0   | 100 |
| <b>Transcriptional Regulating Factor 1</b> (Breast cancer anti-estrogen resistance 2)  |                                 |                 |                 |     |                                         |                              |                                           |     |    |    |     |     |
| <i>TRERF1</i>                                                                          | C > D <sub>G</sub>              | 20              | 0               | L   | 6:423-424                               | 5.55E-04                     | 8                                         | 92  | 0  | 0  | 0   | 0   |
| <i>TRERF1</i>                                                                          | V <sub>G</sub> > D <sub>G</sub> | 16              | 0               | L   | 6:423-424                               | 3.98E-03                     | 8                                         | 92  | 0  | 0  | 0   | 0   |
| <i>TRERF1</i>                                                                          | D <sub>L</sub> > V <sub>L</sub> | 42              | 15              | G   | 6:424-425                               | 7.63E-03                     | 97                                        | 0   | 0  | 0  | 0   | 0   |

| <b>Opioid Binding Protein/Cell Adhesion Molecule Like</b> (Hypogonadotropic Hypogonadism 14)     |                                 |     |    |   |                |          |   |   |   |     |    |     |
|--------------------------------------------------------------------------------------------------|---------------------------------|-----|----|---|----------------|----------|---|---|---|-----|----|-----|
| <i>OPCML</i>                                                                                     | D <sub>G</sub> > C              | 100 | 79 | L | 11:1,331-1,332 | 3.17E-04 | 0 | 0 | 0 | 0   | 0  | 100 |
| <i>OPCML</i>                                                                                     | D <sub>G</sub> > V <sub>G</sub> | 100 | 85 | L | 11:1,331-1,332 | 7.57E-03 | 0 | 0 | 0 | 0   | 0  | 100 |
| <i>OPCML</i>                                                                                     | D <sub>G</sub> > C              | 61  | 24 | L | 11:1,332-1,333 | 1.07E-04 | 0 | 0 | 0 | 0   | 0  | 100 |
| <i>OPCML</i>                                                                                     | D <sub>G</sub> > V <sub>G</sub> | 61  | 15 | L | 11:1,332-1,333 | 6.24E-06 | 0 | 0 | 0 | 0   | 0  | 100 |
| <b>MACRO Domain Containing 2</b> (Mono-ADP Ribosylhydrolase 2, Hypogonadotropic Hypogonadism 21) |                                 |     |    |   |                |          |   |   |   |     |    |     |
| <i>MACROD2</i>                                                                                   | C > D <sub>G</sub>              | 21  | 2  | G | 20:158-159     | 7.43E-04 | 0 | 0 | 0 | 31  | 34 | 0   |
| <i>MACROD2</i>                                                                                   | D <sub>G</sub> > C              | 97  | 77 | G | 20:151-152     | 1.45E-03 | 0 | 0 | 0 | 100 | 0  | 0   |
| <i>MACROD2</i>                                                                                   | C > D <sub>G</sub>              | 64  | 35 | G | 20:144-145     | 2.07E-03 | 0 | 0 | 0 | 74  | 15 | 0   |
| <i>MACROD2</i>                                                                                   | C > D <sub>G</sub>              | 64  | 24 | L | 20:156-157     | 2.82E-05 | 0 | 0 | 0 | 75  | 23 | 0   |
| <i>MACROD2</i>                                                                                   | D <sub>G</sub> > V <sub>G</sub> | 97  | 62 | G | 20:151-152     | 8.43E-06 | 0 | 0 | 0 | 100 | 0  | 0   |
| <i>MACROD2</i>                                                                                   | V <sub>G</sub> > D <sub>G</sub> | 31  | 2  | G | 20:158-159     | 2.79E-05 | 0 | 0 | 0 | 31  | 34 | 0   |
| <i>MACROD2</i>                                                                                   | V <sub>G</sub> > D <sub>G</sub> | 21  | 2  | G | 20:145-146     | 2.03E-03 | 0 | 0 | 0 | 100 | 0  | 0   |
| <i>MACROD2</i>                                                                                   | V <sub>G</sub> > D <sub>G</sub> | 64  | 35 | G | 20:144-145     | 6.56E-03 | 0 | 0 | 0 | 74  | 15 | 0   |
| <i>MACROD2</i>                                                                                   | V <sub>G</sub> > D <sub>G</sub> | 74  | 24 | L | 20:156-157     | 1.17E-06 | 0 | 0 | 0 | 75  | 23 | 0   |
| <i>MACROD2</i>                                                                                   | V <sub>G</sub> > D <sub>G</sub> | 15  | 0  | L | 20:146-147     | 7.25E-03 | 0 | 0 | 0 | 100 | 0  | 0   |

<sup>1</sup> See Table S7 for data on 50-500 kb CNV features;

<sup>2</sup> CNV frequency in first-named, higher frequency group (H), e.g. C-group of C>P pair;

<sup>3</sup> CNV frequency in second-named, lower frequency group (L), e.g. P-group of C>P pair;

<sup>4</sup> Chromosome number with start and end coordinates (to be multiplied by 100 kb);

<sup>5</sup> FDR-corrected *p*-value obtained using Fisher's exact test on counts of CNV features in the two groups compared, as specified in the 'Ratio' column;

<sup>6</sup> % base pairs in 6 replication phases; the % in genomic regions with unknown replication timing are not shown.

**Table 2.** Representative pathways enriched in 100-kb frequency-based CNV features.

| No. | Group <sup>1</sup> |                | CNV <sup>2</sup> | KEGG pathway <sup>3</sup>    | Chromosome <sup>4</sup>       | Gene distribution in replication phases <sup>5</sup> |     |       |     |      |    | Proportion (%) <sup>6</sup> | <i>p</i> -value <sup>7</sup> |
|-----|--------------------|----------------|------------------|------------------------------|-------------------------------|------------------------------------------------------|-----|-------|-----|------|----|-----------------------------|------------------------------|
|     | H                  | L              |                  |                              |                               | G1b                                                  | S1  | S2    | S3  | S4   | G2 |                             |                              |
| 1   | C                  | P              | G                | Steroid hormone biosynthesis | 2                             | -                                                    | -   | +++++ | -   | -    | -  | > 0 - 100                   | [5.7E-04, 1.5E-09]           |
| 2   | C                  | V <sub>G</sub> | G                | Steroid hormone biosynthesis | 2                             | -                                                    | -   | +++++ | -   | -    | -  | > 0 - 100                   | [2.7E-04, 9.3E-10]           |
| 3   | C                  | V <sub>L</sub> | G                | Steroid hormone biosynthesis | 2                             | -                                                    | -   | +++++ | -   | -    | -  | > 0 - 100                   | [2.7E-04, 1.3E-09]           |
| 4   | C                  | D <sub>G</sub> | G                | Steroid hormone biosynthesis | 2,7                           | -                                                    | ++  | ++++  | -   | -    | -  | > 0 - 100                   | [5.6E-05, 1.4E-11]           |
| 5   | C                  | D <sub>L</sub> | G                | Steroid hormone biosynthesis | 2,7                           | -                                                    | ++  | ++++  | -   | -    | -  | > 0 - 100                   | [3.1E-05, 7.6E-12]           |
| 6   | V <sub>L</sub>     | D <sub>L</sub> | L                | Steroid hormone biosynthesis | 2,15                          | +                                                    | -   | +++++ | -   | -    | -  | > 0 - 100                   | [4.8E-02, 6.7E-05]           |
| 7   | V <sub>L</sub>     | D <sub>L</sub> | G                | Steroid hormone biosynthesis | 7,8,1                         | -                                                    | +++ | ++    | -   | -    | -  | 60                          | [4.9E-02, 4.9E-02]           |
| 8   | D <sub>G</sub>     | V <sub>G</sub> | L                | Ovarian steroidogenesis      | 15,10,14,16,7                 | +++                                                  | +   | +     | +   | -    | -  | 40                          | [4.8E-02, 4.8E-02]           |
| 9   | C                  | D <sub>G</sub> | L                | Nicotine addiction           | 6,11,12,15,16,17,5            | -                                                    | +   | ++    | +   | ++   | +  | > 0 - 20                    | [3.2E-02, 1.9E-02]           |
| 10  | C                  | D <sub>L</sub> | L                | Nicotine addiction           | 6,11,12,15,16,17,5            | -                                                    | +   | ++    | +   | ++   | +  | > 0 - 20                    | [4.9E-02, 1.2E-02]           |
| 11  | C                  | D <sub>G</sub> | L                | Circadian entrainment        | 11,17,12,16,20,5,8            | +                                                    | +   | -     | +   | ++++ | +  | 20                          | [2.9E-02, 2.9E-02]           |
| 12  | V <sub>G</sub>     | D <sub>G</sub> | L                | Serotonergic synapse         | 1,11,15,12,17,20,21,5,6,7     | +                                                    | +   | +     | +++ | -    | +  | > 0 - 30                    | [3.8E-02, 1.2E-02]           |
| 13  | V <sub>G</sub>     | D <sub>G</sub> | L                | Glutamatergic synapse        | 11,15,17,1,12,16,20,5,6       | +                                                    | ++  | +     | +   | ++   | +  | > 0, 10                     | [4.6E-02, 3.6E-02]           |
| 14  | V <sub>G</sub>     | D <sub>G</sub> | L                | Nicotine addiction           | 15,11,12,16,17,5              | -                                                    | +   | -     | ++  | +++  | +  | 10                          | [4.6E-02, 4.6E-02]           |
| 15  | V <sub>G</sub>     | D <sub>G</sub> | L                | Dopaminergic synapse         | 1,11,12,16,17,2,20,21,4,5,7,8 | +                                                    | -   | ++    | ++  | ++   | +  | > 0 - 20                    | [4.4E-02, 3.0E-02]           |
| 16  | V <sub>G</sub>     | D <sub>G</sub> | L                | Circadian entrainment        | 1,11,17,12,16,20,21,4,5       | +                                                    | +   | ++    | +   | ++   | +  | > 0 - 20                    | [3.0E-02, 1.7E-02]           |
| 17  | V <sub>G</sub>     | D <sub>G</sub> | L                | cAMP signaling pathway       | 1,11,5,10,12,16,17,3,4,6,7    | +                                                    | +   | +     | ++  | ++   | -  | 20                          | [3.3E-02, 3.3E-02]           |

<sup>1</sup> Significant difference in CNV frequencies between compared groups, with 'H' and 'L' indicating higher- and lower-frequency group respectively. The subscripts 'G' and 'L' indicate sample groups clustered based on CNVG and CNVL respectively;

<sup>2</sup> 'G' indicates copy-number-gains and 'L' indicates copy-number-losses;

<sup>3</sup> KEGG pathway IDs are, in order of appearance in table, hsa00140, hsa04913, hsa05033, hsa04713, hsa04726, hsa04724, hsa04728 and hsa04024;

<sup>4</sup> Chromosomes where pathway genes overlapped with CNV feature(s);

<sup>5</sup> Approximate distribution of pathway genes in different replication phases, with '-' indicating 0%, and one '+' indicating 0-20%, up to six '+' indicating 100%;

<sup>6</sup> Proportion of gene sequence overlapping with the CNV feature(s) ranging from > 0% to 100%;

<sup>7</sup> Range of Benjamini-adjusted *p*-values of pathway enrichment pertaining to bottom and top figures referred to in footnote 6.

**Table 3.** Selected genomic features in 100-kb frequency-based diagnostic CNV features with fold-change greater than 1 in at least one replication phase(s).

| Group <sup>1</sup>                                                           |                | CNV <sup>2</sup> | Fold-change in different replication phases <sup>3</sup> |             |              |             |             |             |
|------------------------------------------------------------------------------|----------------|------------------|----------------------------------------------------------|-------------|--------------|-------------|-------------|-------------|
| H                                                                            | L              |                  | G1b                                                      | S1          | S2           | S3          | S4          | G2          |
| <b><i>CpGi (CpG island)</i></b>                                              |                |                  |                                                          |             |              |             |             |             |
| C                                                                            | P              | G                | -0.32                                                    | 0.06        | -0.06        | <b>1.62</b> | -0.18       | <b>1.15</b> |
| C                                                                            | P              | L                | -0.18                                                    | 0.05        | 0.39         | 0.46        | <b>1.10</b> | <b>2.20</b> |
| C                                                                            | D <sub>L</sub> | G                | -0.45                                                    | 0.02        | -0.08        | 0.59        | <b>1.18</b> | 0.57        |
| C                                                                            | V <sub>G</sub> | L                | 0.14                                                     | 0.06        | 0.69         | 0.71        | 0.47        | <b>1.42</b> |
| P                                                                            | C              | L                | -0.34                                                    | 0.12        | -0.02        | 0.38        | -0.23       | <b>1.08</b> |
| <b><i>Me450 (Methylation status using HumanMethylation450)</i></b>           |                |                  |                                                          |             |              |             |             |             |
| C                                                                            | P              | G                | -0.51                                                    | 0.54        | <b>1.04</b>  | 0.88        | -0.01       | 0.43        |
| C                                                                            | P              | L                | -0.29                                                    | 0.23        | -0.02        | 0.33        | <b>1.16</b> | <b>1.05</b> |
| C                                                                            | V <sub>L</sub> | G                | <b>1.00</b>                                              | 0.04        | -0.02        | -0.35       | -0.48       | -0.25       |
| <b><i>MeBS (cytosine methylation using bisulfite sequencing)</i></b>         |                |                  |                                                          |             |              |             |             |             |
| C                                                                            | P              | L                | -0.12                                                    | 0.45        | 0.12         | 0.49        | <b>1.53</b> | <b>1.55</b> |
| C                                                                            | D <sub>L</sub> | G                | -0.53                                                    | 0.10        | 0.06         | 0.64        | <b>1.65</b> | 0.59        |
| C                                                                            | V <sub>G</sub> | L                | 0.27                                                     | 0.26        | 0.69         | 0.94        | <b>1.51</b> | 0.29        |
| D <sub>G</sub>                                                               | C              | L                | <b>1.03</b>                                              | 0.54        | 0.35         | 0.24        | <b>1.20</b> | -0.39       |
| D <sub>L</sub>                                                               | C              | L                | <b>1.38</b>                                              | 0.20        | 0.25         | 0.37        | 0.13        | -0.34       |
| D <sub>G</sub>                                                               | V <sub>G</sub> | L                | <b>1.15</b>                                              | 0.41        | 0.37         | 0.46        | <b>1.69</b> | -0.24       |
| D <sub>L</sub>                                                               | V <sub>L</sub> | L                | 0.82                                                     | 0.45        | 0.53         | 0.59        | <b>1.47</b> | -0.15       |
| V <sub>L</sub>                                                               | D <sub>L</sub> | G                | 0.15                                                     | -0.17       | -0.14        | 0.45        | <b>1.35</b> | <b>1.21</b> |
| <b><i>MeMRE (Methylation using MRE-)</i></b>                                 |                |                  |                                                          |             |              |             |             |             |
| C                                                                            | P              | G                | -0.26                                                    | 0.23        | -0.30        | <b>2.00</b> | -0.12       | -0.19       |
| C                                                                            | P              | L                | -0.23                                                    | -0.06       | 0.31         | 0.47        | <b>1.44</b> | 0.90        |
| P                                                                            | C              | L                | -0.13                                                    | 0.10        | 0.10         | 0.33        | -0.22       | <b>1.70</b> |
| <b><i>DNase (DNase I hypersensitive sites)</i></b>                           |                |                  |                                                          |             |              |             |             |             |
| C                                                                            | P              | L                | -0.12                                                    | 0.02        | 0.11         | 0.55        | 0.46        | <b>1.02</b> |
| C                                                                            | V <sub>L</sub> | G                | 0.22                                                     | -0.30       | 0.25         | -0.55       | 0.04        | <b>1.14</b> |
| P                                                                            | C              | L                | -0.10                                                    | 0.08        | 0.51         | 0.38        | <b>1.80</b> | -0.13       |
| D <sub>G</sub>                                                               | C              | L                | 0.28                                                     | 0.27        | 0.24         | -0.05       | <b>1.37</b> | -0.52       |
| D <sub>L</sub>                                                               | C              | L                | 0.47                                                     | 0.22        | 0.39         | -0.12       | <b>1.77</b> | -0.14       |
| V <sub>G</sub>                                                               | C              | L                | -0.16                                                    | 0.22        | 0.05         | 0.00        | <b>1.38</b> | -0.57       |
| V <sub>L</sub>                                                               | C              | L                | -0.15                                                    | 0.14        | 0.25         | 0.09        | <b>1.08</b> | -0.66       |
| <b><i>FAIRE (Formaldehyde-assisted isolation of regulatory elements)</i></b> |                |                  |                                                          |             |              |             |             |             |
| C                                                                            | P              | L                | -0.18                                                    | 0.17        | -0.10        | 0.15        | 0.71        | <b>2.69</b> |
| C                                                                            | V <sub>G</sub> | L                | -0.23                                                    | 0.12        | 0.03         | 0.14        | 0.46        | <b>2.97</b> |
| C                                                                            | V <sub>L</sub> | L                | 0.02                                                     | 0.08        | -0.04        | 0.04        | 0.33        | <b>2.54</b> |
| P                                                                            | C              | L                | -0.09                                                    | 0.16        | 0.53         | -0.03       | 0.86        | <b>1.56</b> |
| D <sub>G</sub>                                                               | C              | L                | 0.32                                                     | 0.28        | 0.16         | -0.17       | <b>1.55</b> | 0.14        |
| D <sub>L</sub>                                                               | C              | L                | 0.34                                                     | 0.29        | 0.33         | -0.24       | <b>2.11</b> | <b>1.25</b> |
| D <sub>G</sub>                                                               | V <sub>G</sub> | L                | 0.22                                                     | 0.17        | 0.11         | 0.11        | <b>1.15</b> | 0.92        |
| D <sub>L</sub>                                                               | V <sub>L</sub> | L                | 0.20                                                     | 0.21        | 0.02         | 0.03        | 0.77        | <b>2.08</b> |
| <b><i>LINC (Large intergenic non-coding RNA)</i></b>                         |                |                  |                                                          |             |              |             |             |             |
| <b><i>Continued</i></b>                                                      |                |                  |                                                          |             |              |             |             |             |
| C                                                                            | P              | G                | -0.97                                                    | -0.52       | <b>18.30</b> | <b>4.23</b> | 0.32        | -0.11       |
| C                                                                            | P              | L                | -0.99                                                    | <b>1.05</b> | 0.17         | <b>1.02</b> | -0.73       | 0.92        |
| C                                                                            | V <sub>L</sub> | G                | 0.11                                                     | -0.96       | 0.03         | <b>1.75</b> | -0.55       | <b>2.42</b> |
| C                                                                            | V <sub>G</sub> | L                | -1.00                                                    | -0.77       | -0.79        | -0.93       | -0.47       | <b>1.59</b> |
| C                                                                            | V <sub>L</sub> | L                | -0.98                                                    | -0.74       | -0.72        | -0.87       | -0.50       | <b>1.06</b> |
| V <sub>G</sub>                                                               | C              | L                | 0.48                                                     | -0.70       | 0.32         | <b>2.14</b> | <b>1.61</b> | <b>1.36</b> |
| V <sub>L</sub>                                                               | C              | L                | 0.31                                                     | -0.75       | -0.02        | <b>1.80</b> | <b>1.01</b> | 0.74        |
| V <sub>G</sub>                                                               | D <sub>G</sub> | L                | 0.37                                                     | -0.67       | <b>1.19</b>  | 0.52        | 0.33        | <b>1.34</b> |
| <b><i>RecD (Sex-averaged rates of recombination)</i></b>                     |                |                  |                                                          |             |              |             |             |             |
| P                                                                            | C              | L                | <b>1.31</b>                                              | 0.39        | 0.26         | 0.44        | 0.36        | 0.97        |
| D <sub>G</sub>                                                               | C              | L                | 0.23                                                     | 0.16        | 0.43         | 0.42        | 0.35        | <b>1.24</b> |
| D <sub>L</sub>                                                               | C              | L                | 0.40                                                     | 0.30        | 0.52         | 0.50        | 0.51        | <b>1.56</b> |
| D <sub>L</sub>                                                               | V <sub>L</sub> | L                | 0.25                                                     | 0.13        | 0.24         | 0.22        | 0.45        | <b>1.06</b> |
| <b><i>GWAS (GWAS-identified SNPs)</i></b>                                    |                |                  |                                                          |             |              |             |             |             |
| C                                                                            | V <sub>G</sub> | L                | <b>2.08</b>                                              | -0.01       | -0.02        | -0.35       | 0.18        | 0.60        |
| C                                                                            | V <sub>L</sub> | L                | <b>1.63</b>                                              | -0.13       | -0.01        | -0.23       | 0.10        | 0.38        |
| P                                                                            | C              | G                | -0.26                                                    | <b>5.48</b> | -0.38        | 0.27        | -0.26       | -0.34       |
| D <sub>G</sub>                                                               | C              | G                | -0.16                                                    | <b>1.61</b> | -0.13        | -0.28       | -0.05       | -0.01       |
| D <sub>L</sub>                                                               | C              | G                | -0.08                                                    | <b>1.78</b> | -0.17        | -0.22       | -0.03       | -0.16       |
| V <sub>G</sub>                                                               | C              | L                | -0.34                                                    | -0.20       | -0.22        | -0.23       | <b>2.78</b> | -0.14       |
| V <sub>L</sub>                                                               | C              | L                | -0.28                                                    | -0.37       | -0.29        | -0.17       | <b>2.00</b> | 0.01        |
| D <sub>G</sub>                                                               | V <sub>G</sub> | G                | -0.16                                                    | <b>1.25</b> | -0.02        | 0.33        | -0.28       | -0.25       |
| D <sub>L</sub>                                                               | V <sub>L</sub> | G                | -0.08                                                    | <b>1.27</b> | -0.03        | 0.24        | -0.24       | -0.11       |
| <b><i>GV hotspot (Density-based genetic-variant hotspot)</i></b>             |                |                  |                                                          |             |              |             |             |             |
| C                                                                            | V <sub>G</sub> | G                | <b>1.97</b>                                              | -0.34       | -0.21        | -0.27       | -0.15       | <b>1.22</b> |
| C                                                                            | V <sub>L</sub> | G                | <b>1.63</b>                                              | 0.01        | -0.27        | -0.09       | -0.28       | 0.69        |
| P                                                                            | C              | L                | 0.12                                                     | -0.01       | -0.11        | 0.70        | <b>1.58</b> | 0.29        |
| D <sub>G</sub>                                                               | V <sub>G</sub> | G                | -0.03                                                    | -0.23       | -0.44        | 0.14        | 0.20        | <b>1.03</b> |
| D <sub>L</sub>                                                               | V <sub>L</sub> | G                | 0.01                                                     | -0.31       | -0.43        | 0.28        | 0.00        | <b>1.06</b> |
| D <sub>G</sub>                                                               | V <sub>G</sub> | L                | 0.30                                                     | 0.27        | 0.09         | 0.42        | 0.61        | <b>1.22</b> |
| <b><i>Cluster (Cluster of genetic-variant hotspots)</i></b>                  |                |                  |                                                          |             |              |             |             |             |
| C                                                                            | D <sub>L</sub> | L                | 0.03                                                     | -0.84       | 0.38         | -0.87       | -0.30       | <b>2.42</b> |
| C                                                                            | V <sub>G</sub> | G                | <b>3.68</b>                                              | -1.00       | -1.00        | 0.42        | -0.15       | -0.29       |
| C                                                                            | V <sub>L</sub> | G                | <b>2.90</b>                                              | -1.00       | -1.00        | 0.37        | -0.21       | -0.52       |
| C                                                                            | V <sub>G</sub> | L                | -0.23                                                    | <b>1.42</b> | 0.03         | 0.24        | 0.26        | 0.83        |
| P                                                                            | C              | L                | -1.00                                                    | -1.00       | -0.27        | <b>4.33</b> | <b>4.26</b> | -1.00       |
| D <sub>G</sub>                                                               | C              | L                | <b>2.15</b>                                              | 0.73        | -0.05        | 0.57        | <b>1.34</b> | -1.00       |
| D <sub>L</sub>                                                               | C              | L                | <b>2.46</b>                                              | 0.90        | 0.07         | 0.73        | <b>1.11</b> | -1.00       |

***LINC (Large intergenic non-coding RNA)***

|                |                |   |             |       |             |             |             |             |                |                |   |       |             |             |             |             |             |
|----------------|----------------|---|-------------|-------|-------------|-------------|-------------|-------------|----------------|----------------|---|-------|-------------|-------------|-------------|-------------|-------------|
| C              | D <sub>G</sub> | G | 0.50        | -0.64 | <b>7.56</b> | <b>1.38</b> | <b>1.46</b> | 0.11        | V <sub>G</sub> | C              | G | -1.00 | -0.26       | <b>1.48</b> | 0.46        | 0.12        | -0.83       |
| C              | D <sub>L</sub> | G | -0.98       | -0.76 | <b>8.90</b> | <b>1.53</b> | <b>1.51</b> | 0.16        | V <sub>L</sub> | C              | G | -1.00 | <b>1.45</b> | 0.72        | 0.19        | -0.08       | -0.38       |
| C              | D <sub>G</sub> | L | -0.86       | 0.44  | 0.46        | -0.79       | -0.88       | <b>3.10</b> | V <sub>G</sub> | C              | L | -0.41 | -0.72       | -0.70       | <b>1.68</b> | 0.46        | -0.97       |
| D <sub>G</sub> | C              | G | <b>1.84</b> | -0.92 | -0.68       | 0.21        | -0.99       | -0.80       | V <sub>L</sub> | C              | L | -0.21 | -0.78       | -0.41       | <b>1.20</b> | 0.27        | -0.89       |
| D <sub>G</sub> | C              | L | -0.85       | -0.84 | -0.95       | <b>1.89</b> | -1.00       | -1.00       | D <sub>G</sub> | V <sub>G</sub> | G | 0.02  | -0.65       | -0.55       | -0.50       | <b>1.52</b> | 0.89        |
| D <sub>L</sub> | C              | L | -0.81       | -0.82 | -0.95       | <b>1.85</b> | -1.00       | -1.00       | D <sub>L</sub> | V <sub>L</sub> | G | -0.05 | -0.64       | -0.55       | -0.53       | <b>1.41</b> | 0.95        |
| V <sub>G</sub> | D <sub>G</sub> | G | 0.87        | -0.74 | <b>4.34</b> | -0.66       | 0.81        | 0.16        | D <sub>G</sub> | V <sub>G</sub> | L | 0.91  | 0.42        | 0.43        | 0.64        | <b>1.71</b> | <b>1.25</b> |
| V <sub>L</sub> | D <sub>L</sub> | G | 0.76        | -0.75 | <b>3.45</b> | -0.69       | 0.65        | -0.08       | V <sub>G</sub> | D <sub>G</sub> | L | -0.64 | -0.36       | <b>3.00</b> | 0.50        | 0.12        | 0.20        |
|                |                |   |             |       |             |             |             |             | V <sub>L</sub> | D <sub>L</sub> | L | -0.44 | -0.52       | -0.15       | 0.41        | -0.38       | <b>1.07</b> |

<sup>1</sup> Significant difference in CNV frequencies between compared groups, with ‘H’ and ‘L’ indicating higher- and lower-frequency group respectively. The subscripts ‘G’ and ‘L’ indicate sample groups clustered based on CNVG and CNVL respectively;

<sup>2</sup> ‘G’ indicates copy-number-gains and ‘L’ indicates copy-number-losses;

<sup>3</sup> Fold-change (> 1-fold in bold) of genomic feature density or intensity in diagnostic CNV features relative to non-diagnostic-CNV regions in replication phase.

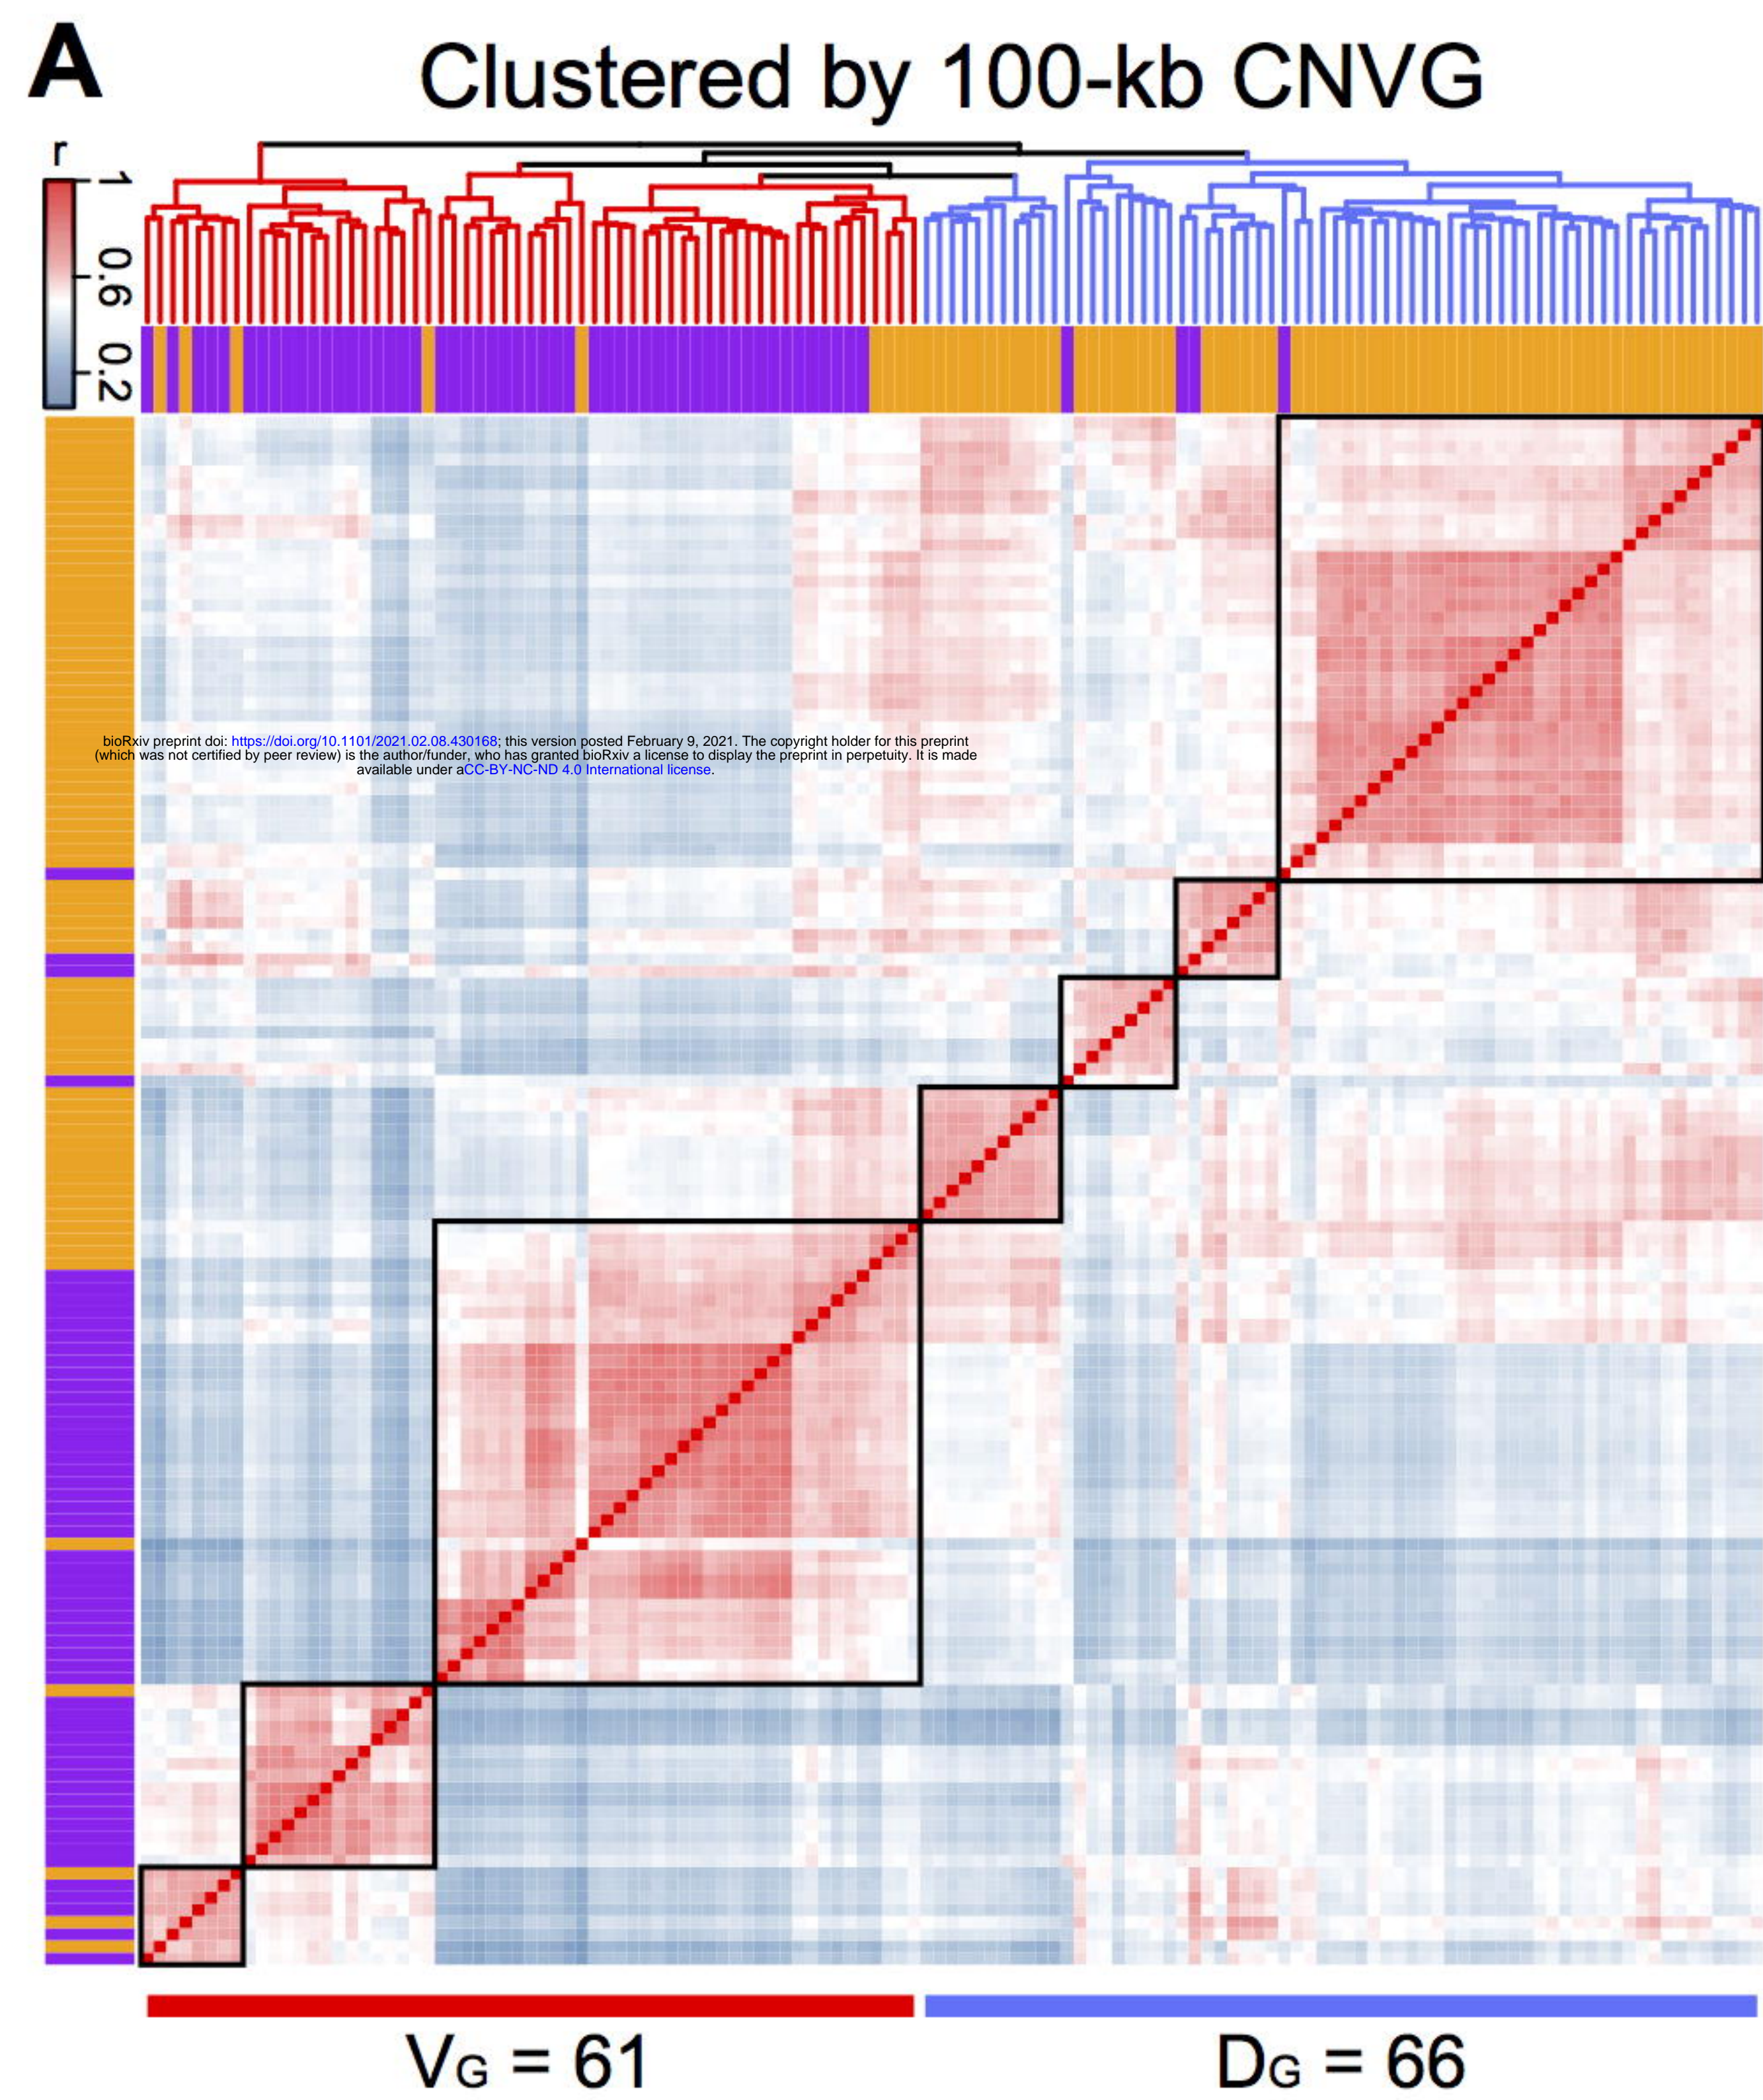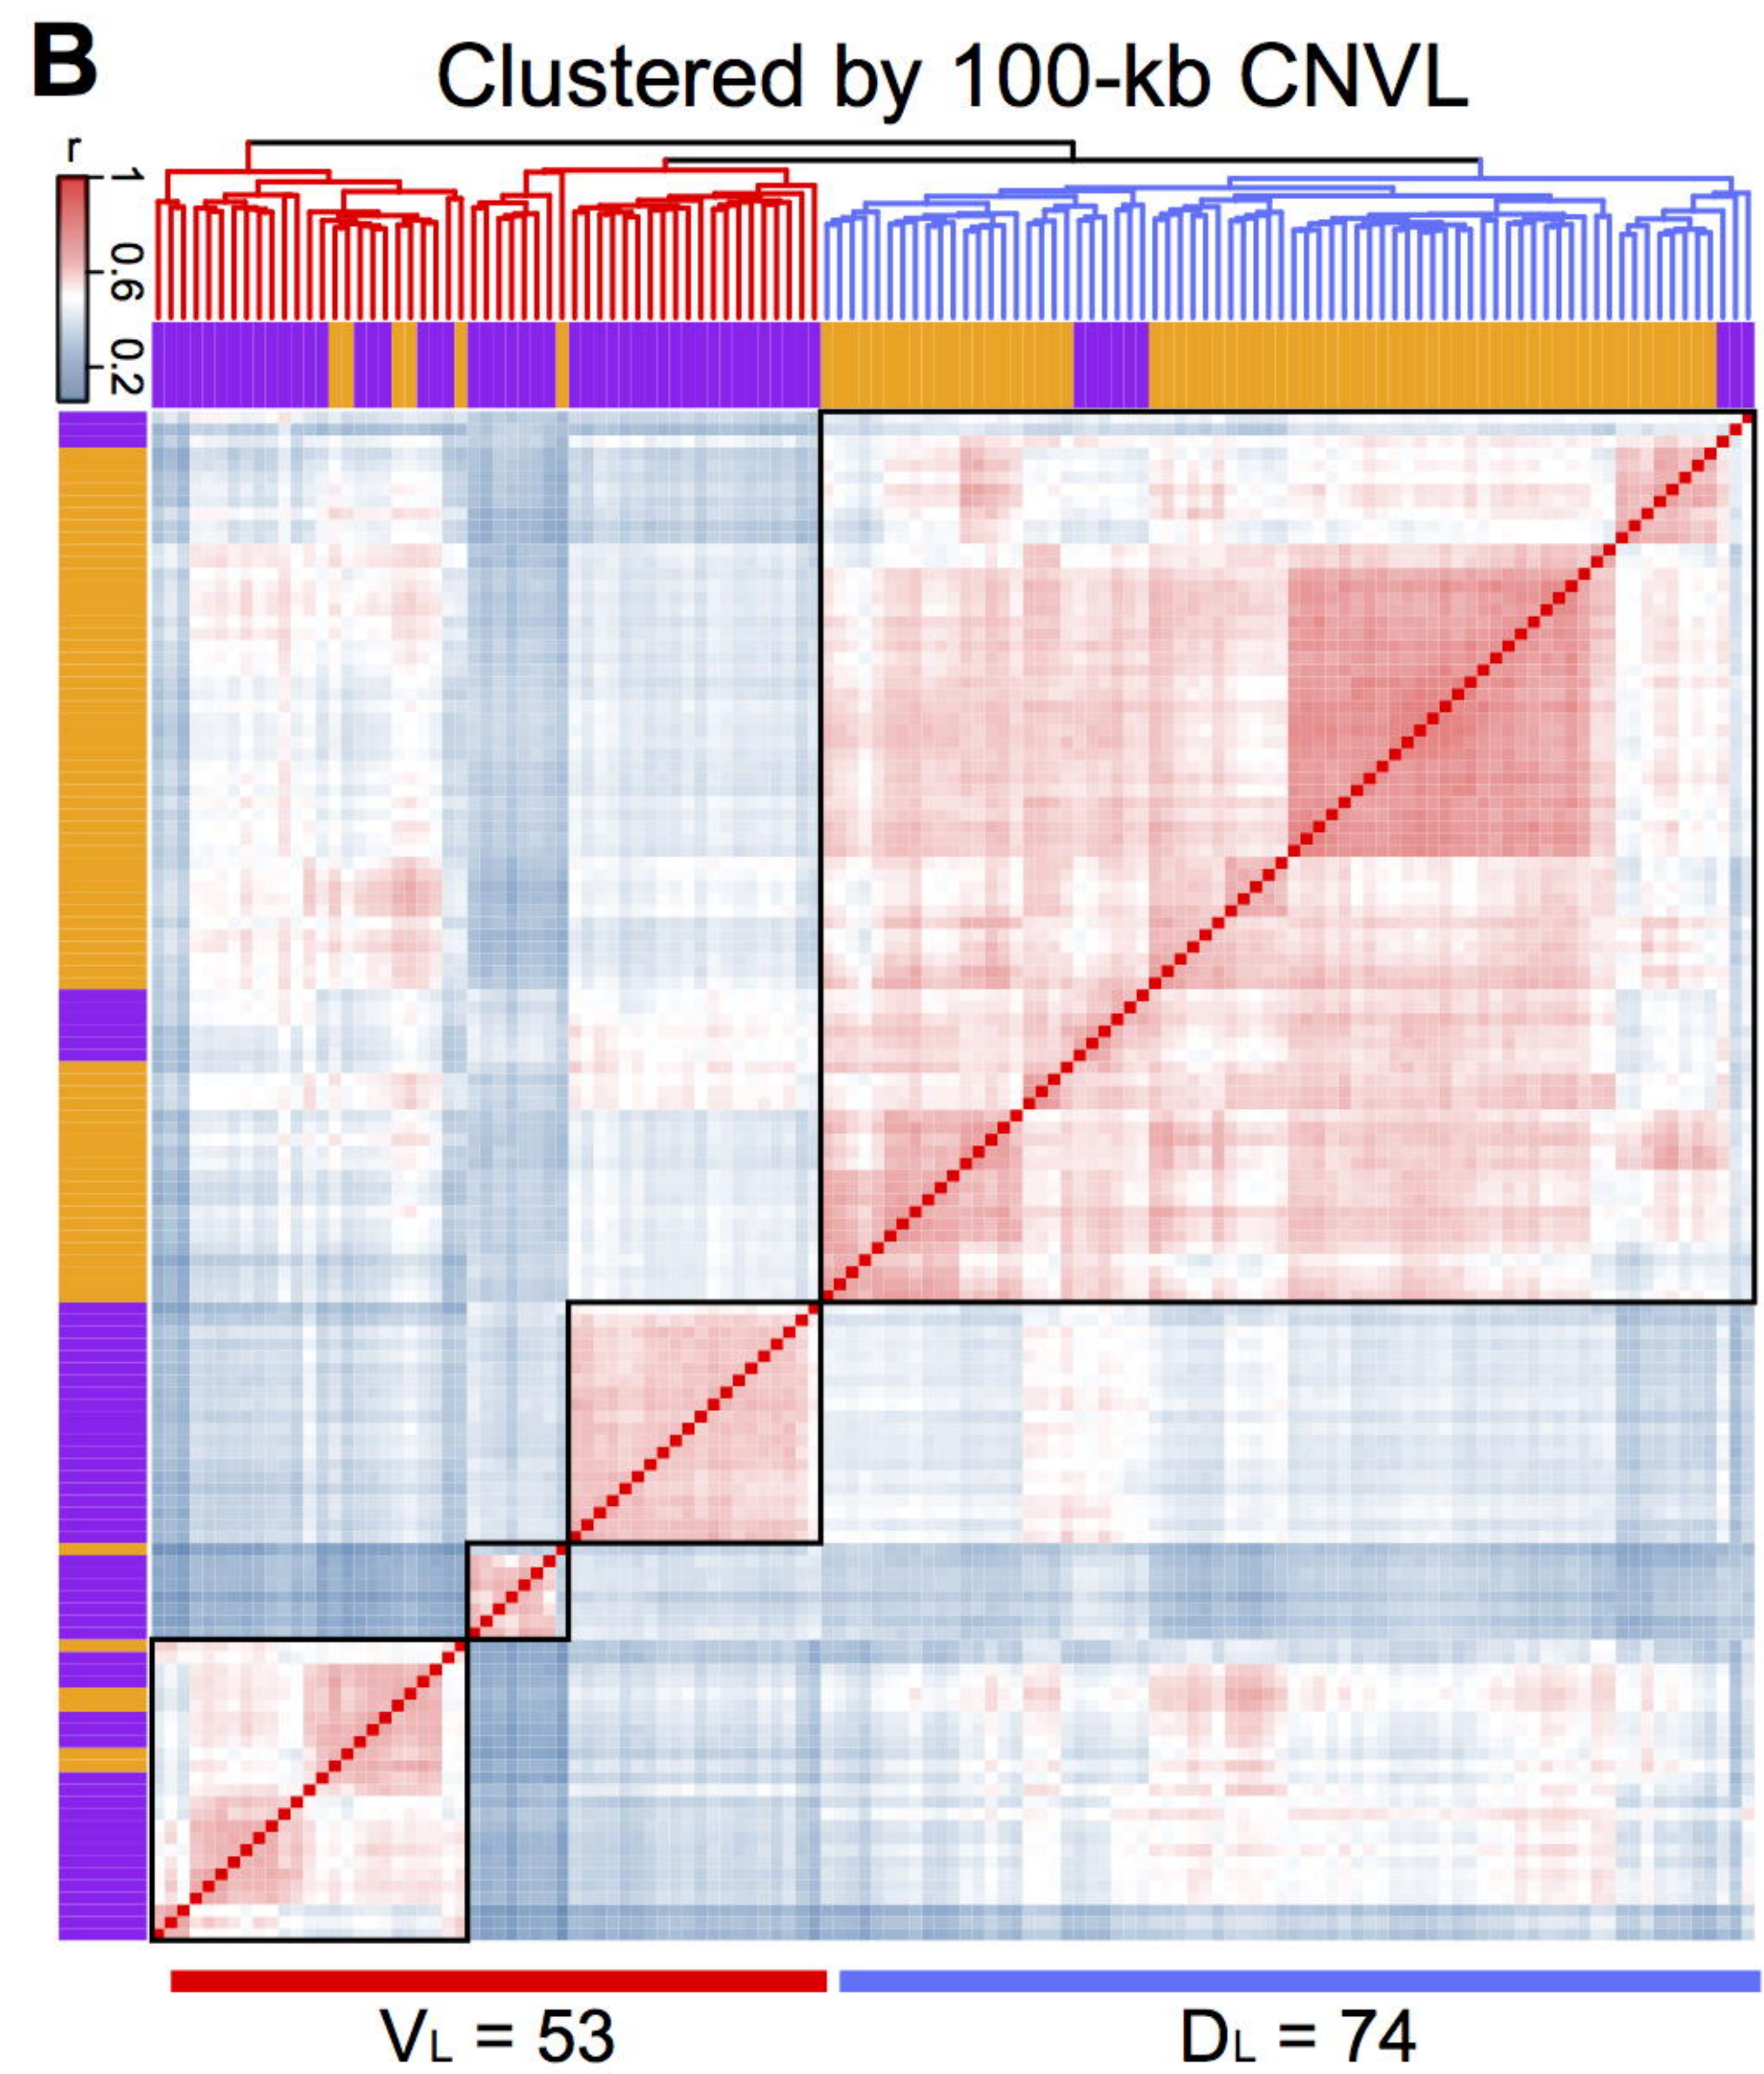

**A**

**P vs. C**

CNV Features:  
 △ Correlation-based  
 ○ Frequency-based

CNV Frequency in Group 2 (%)

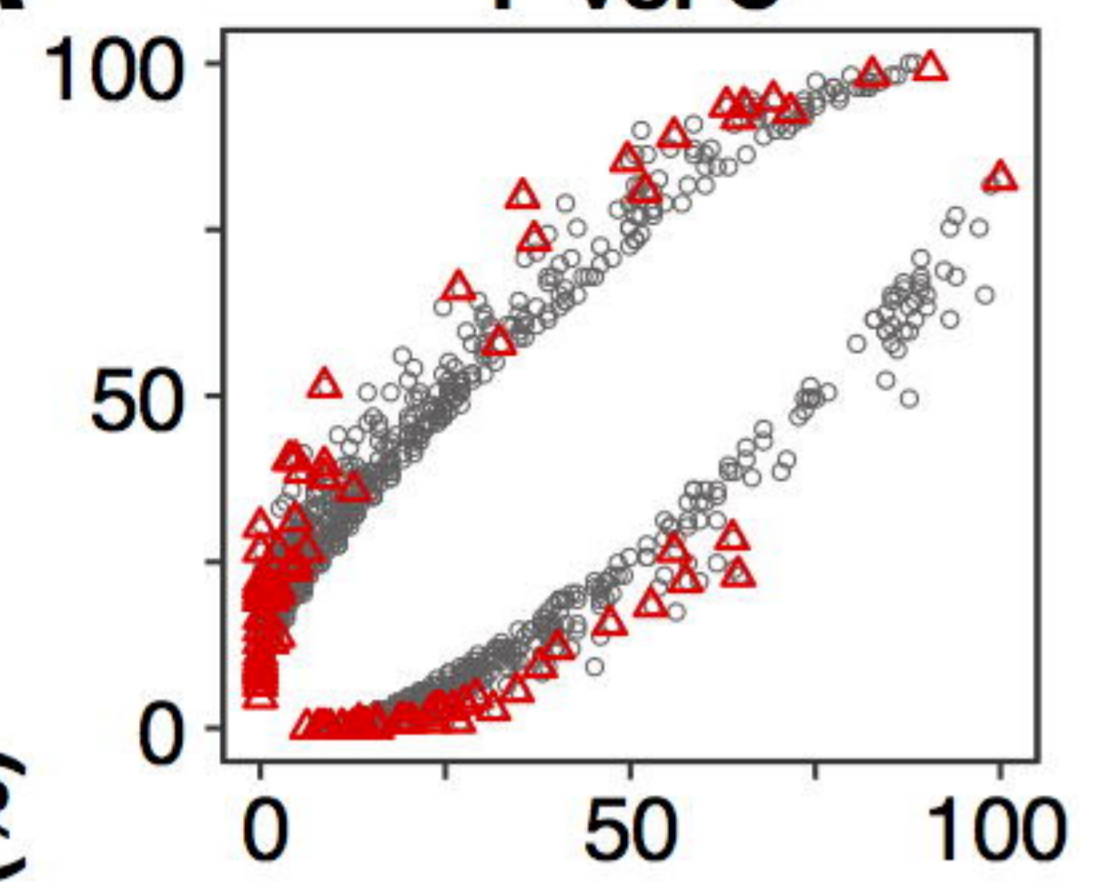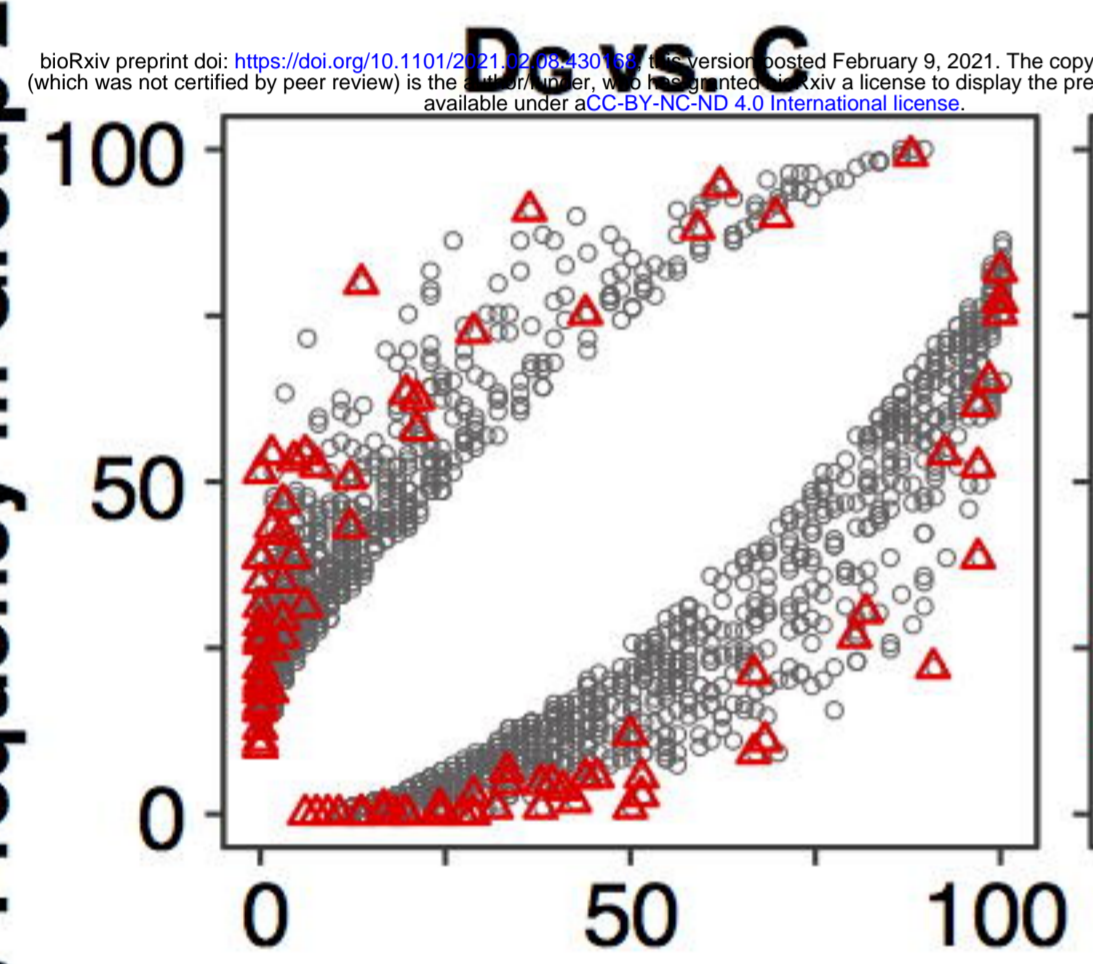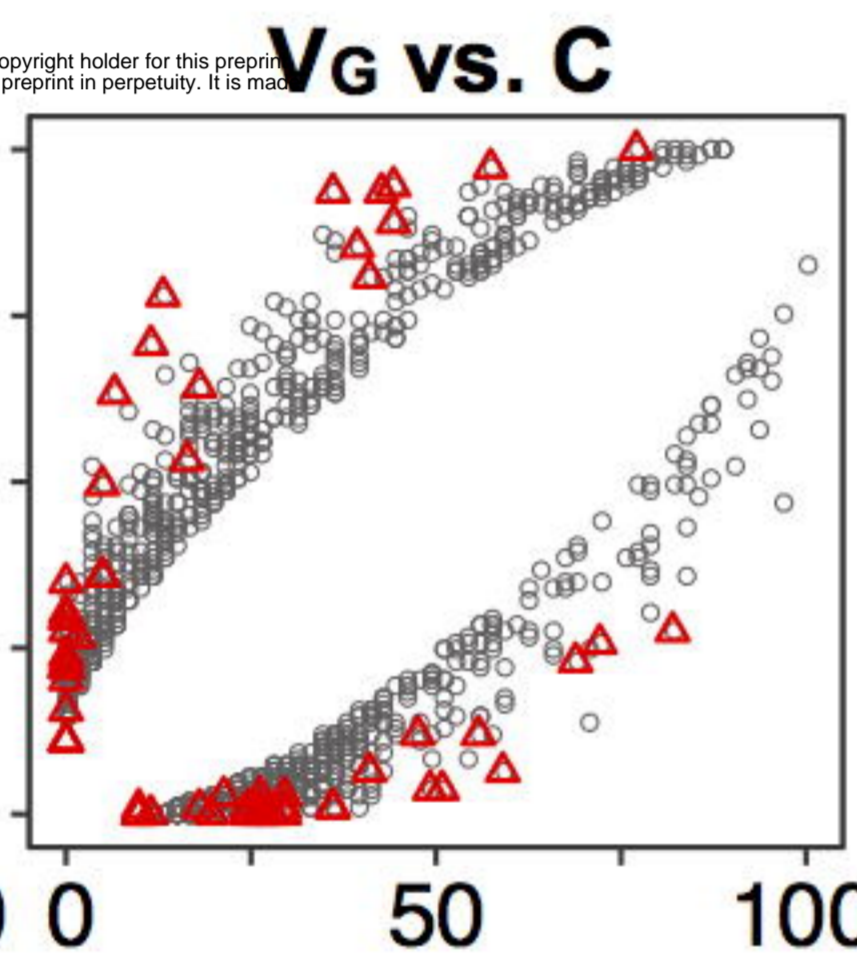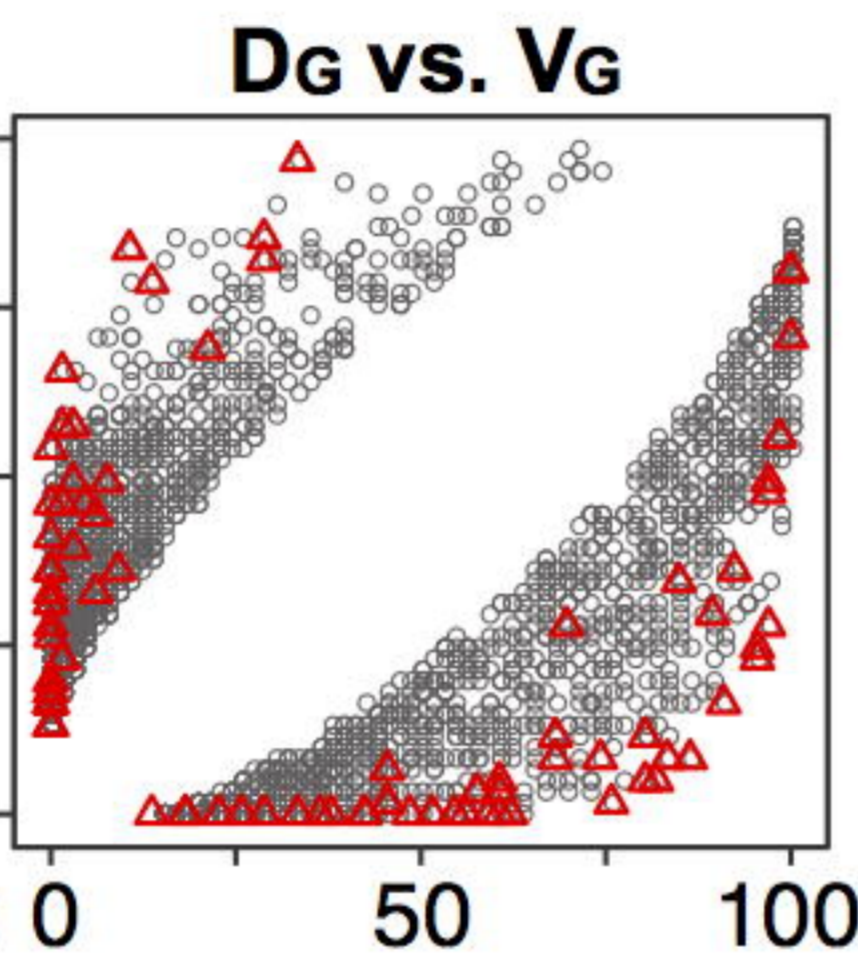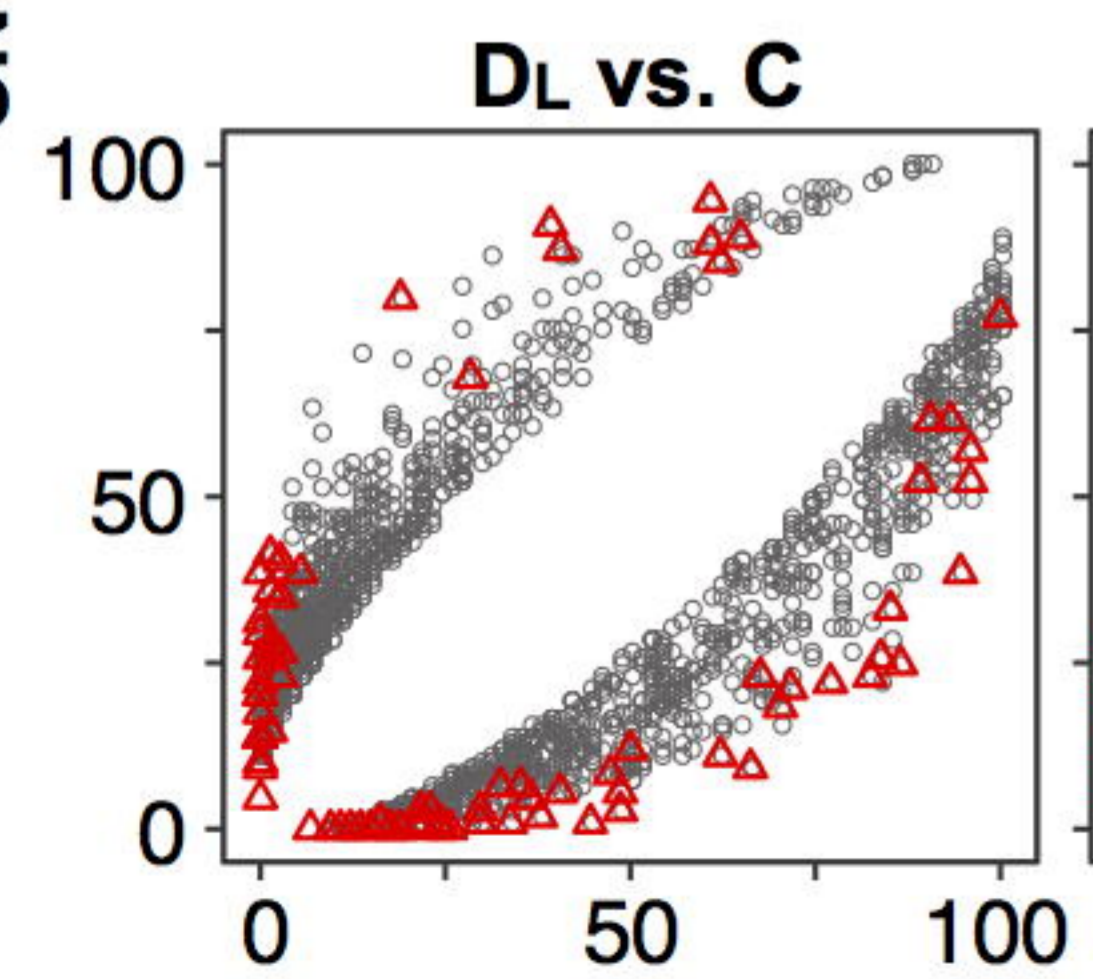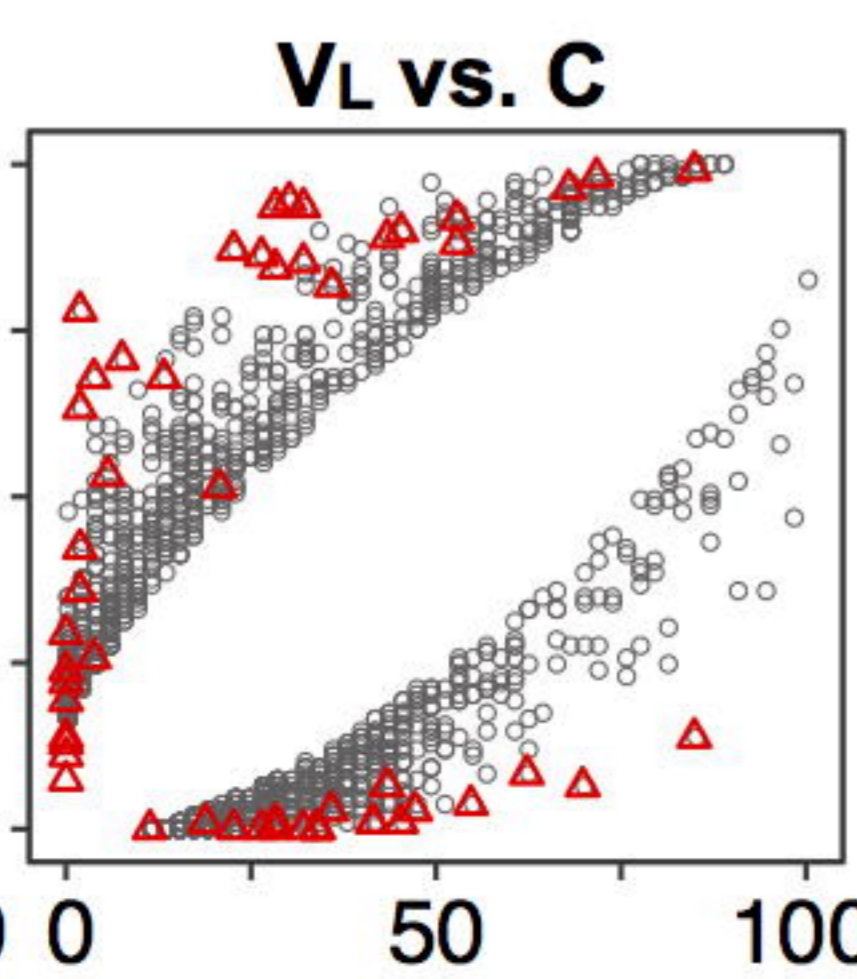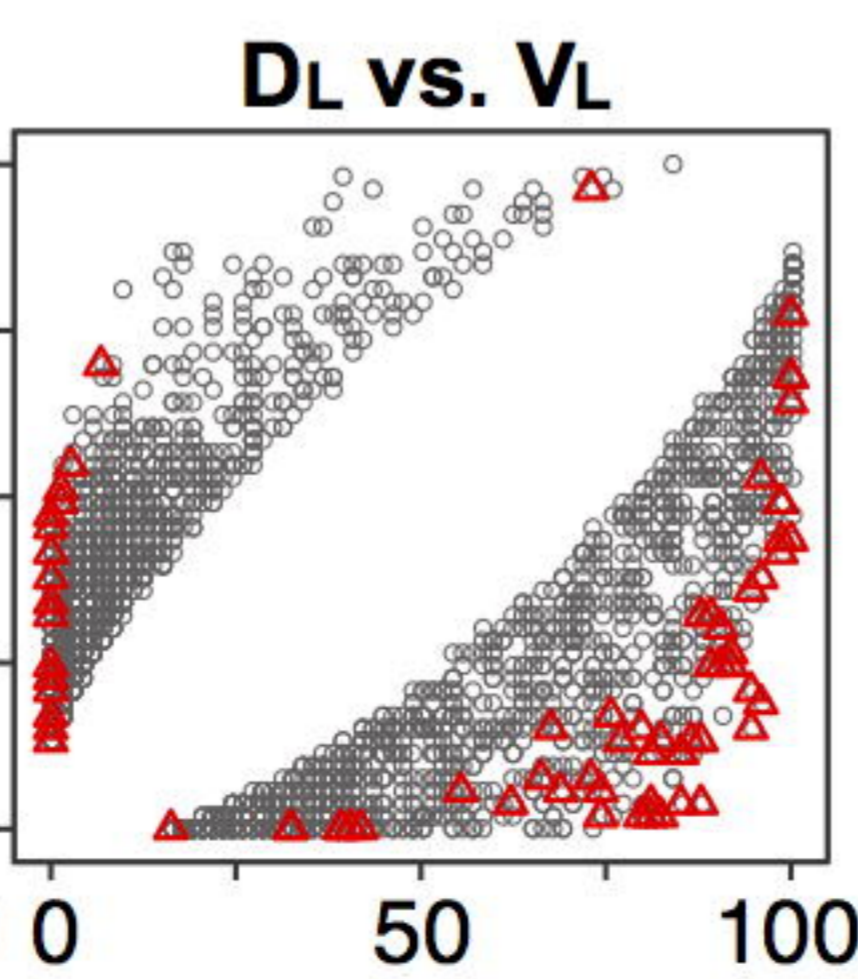

CNV Frequency in Group 1 (%)

**B**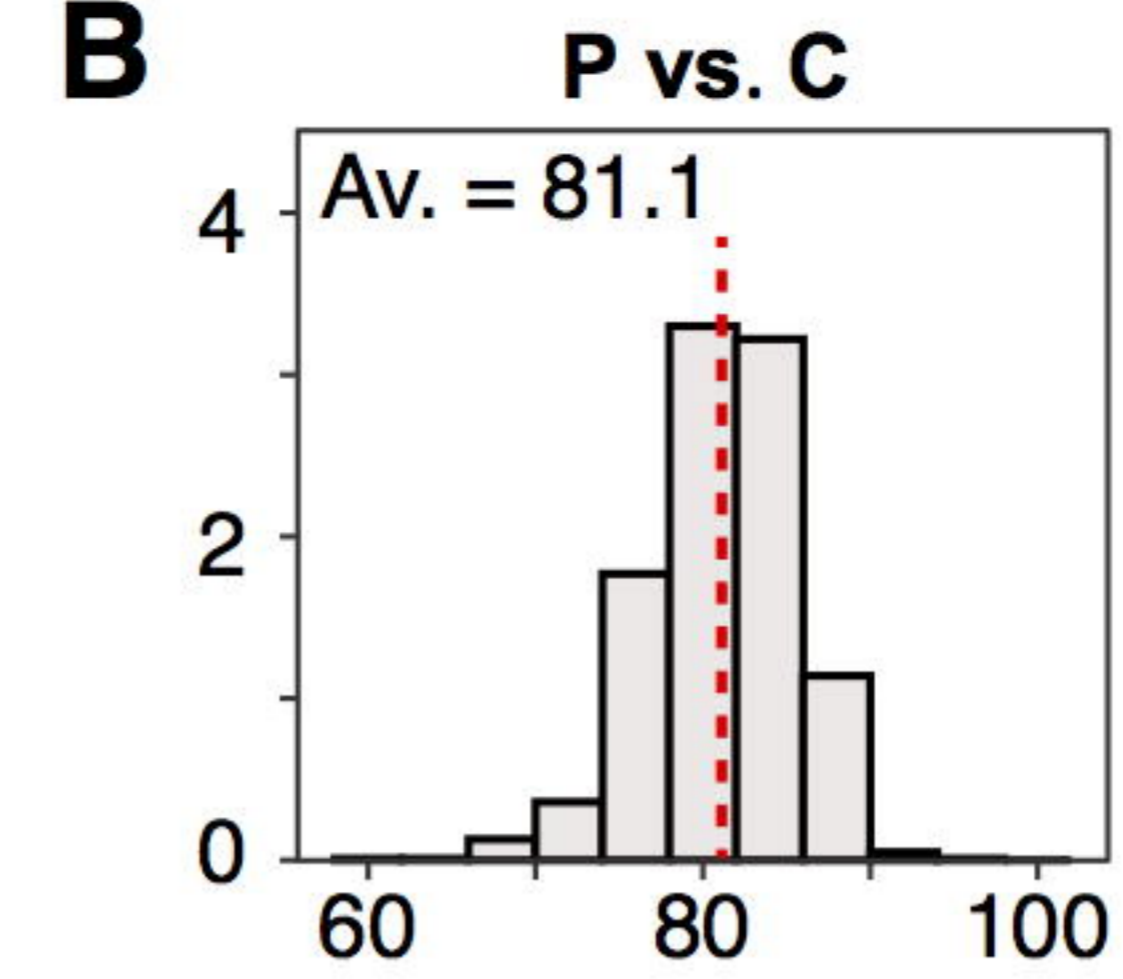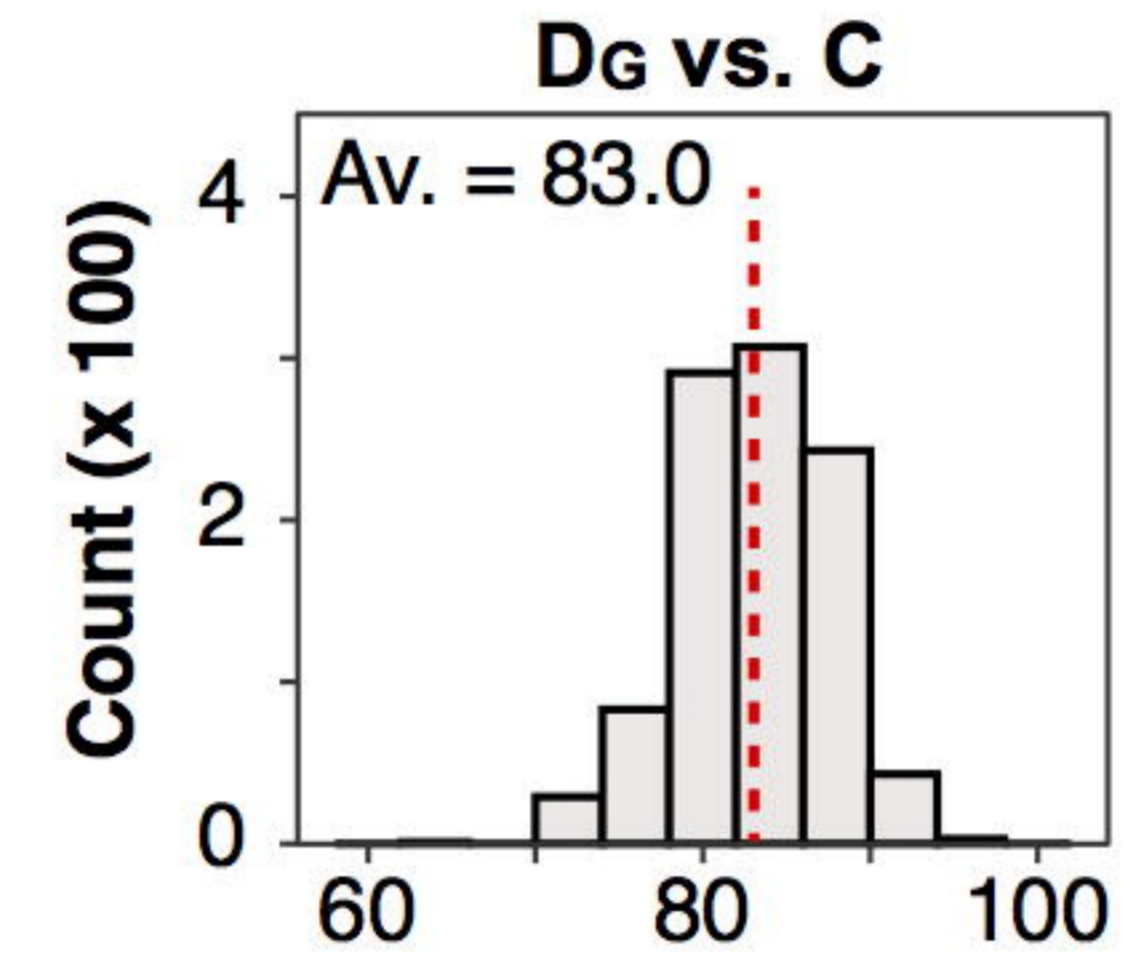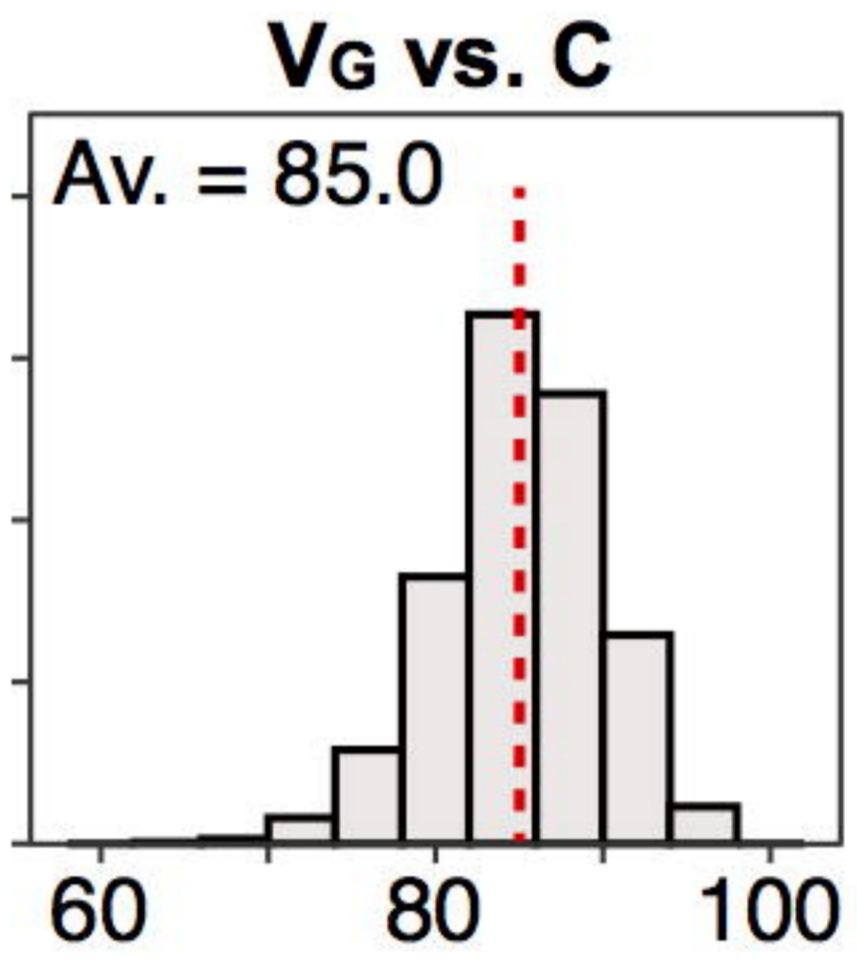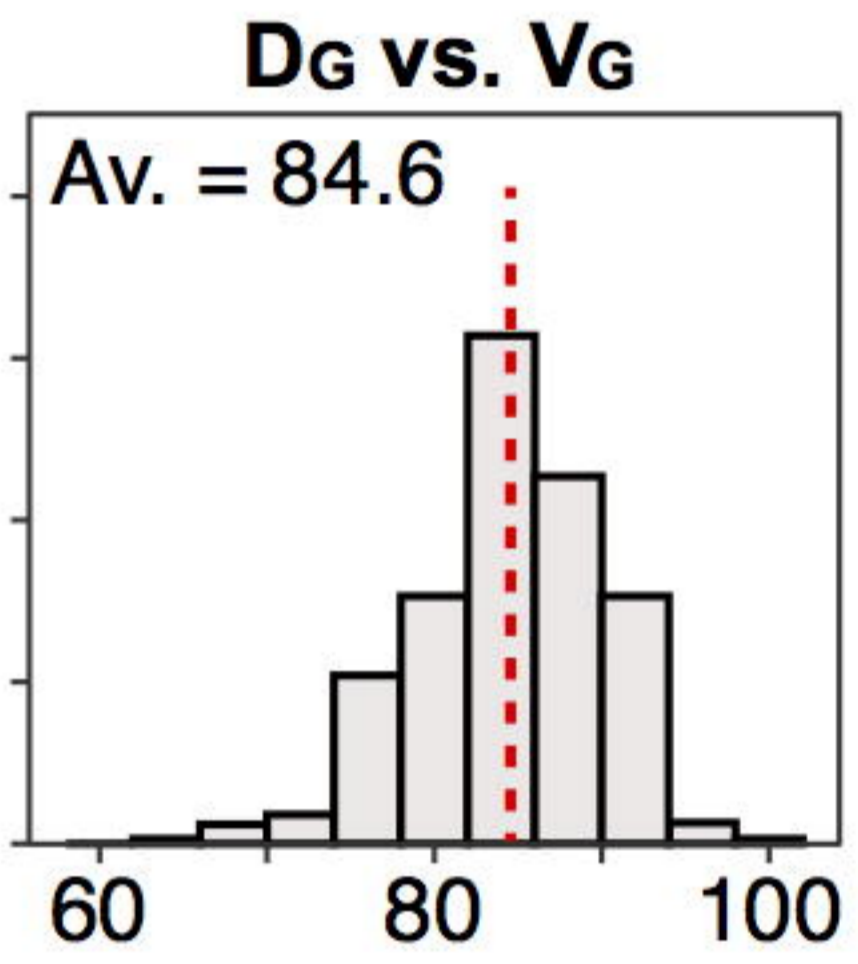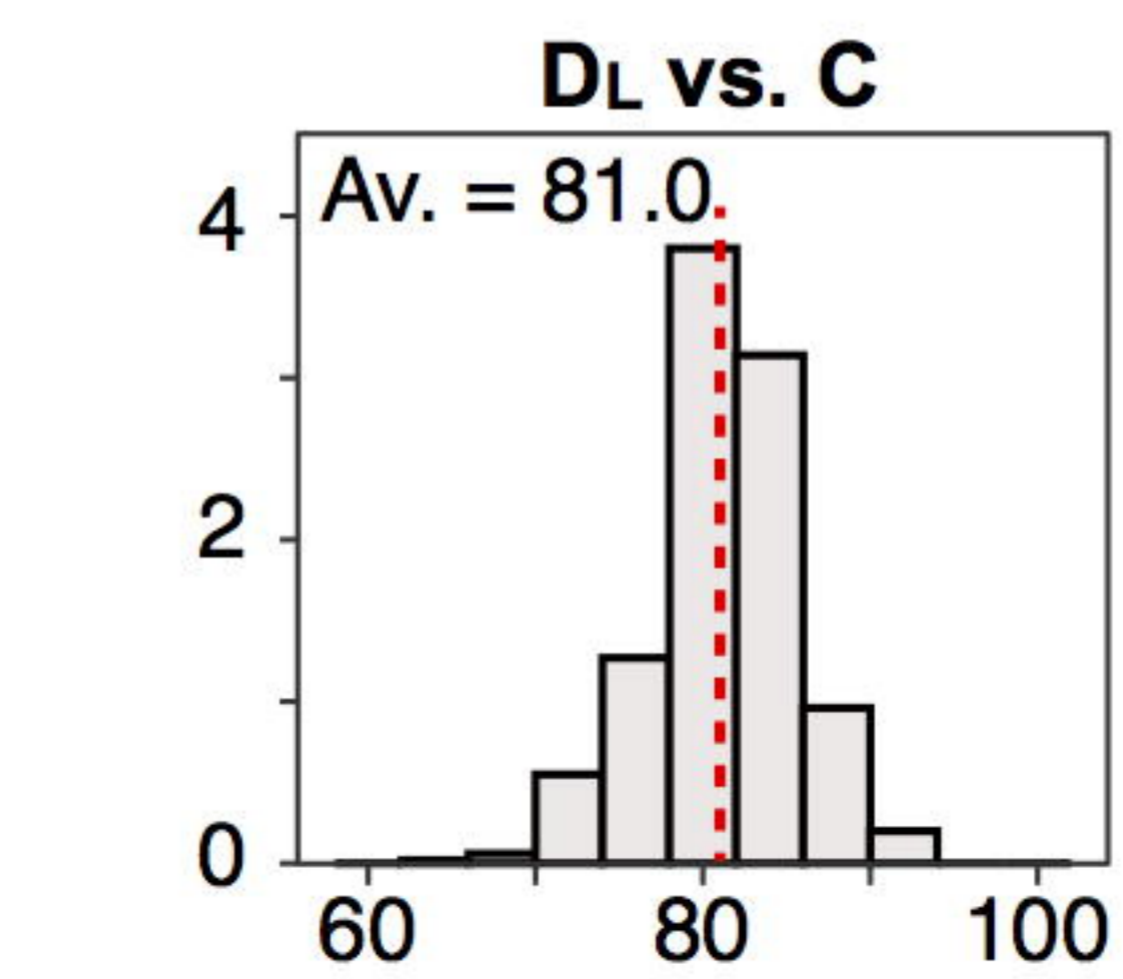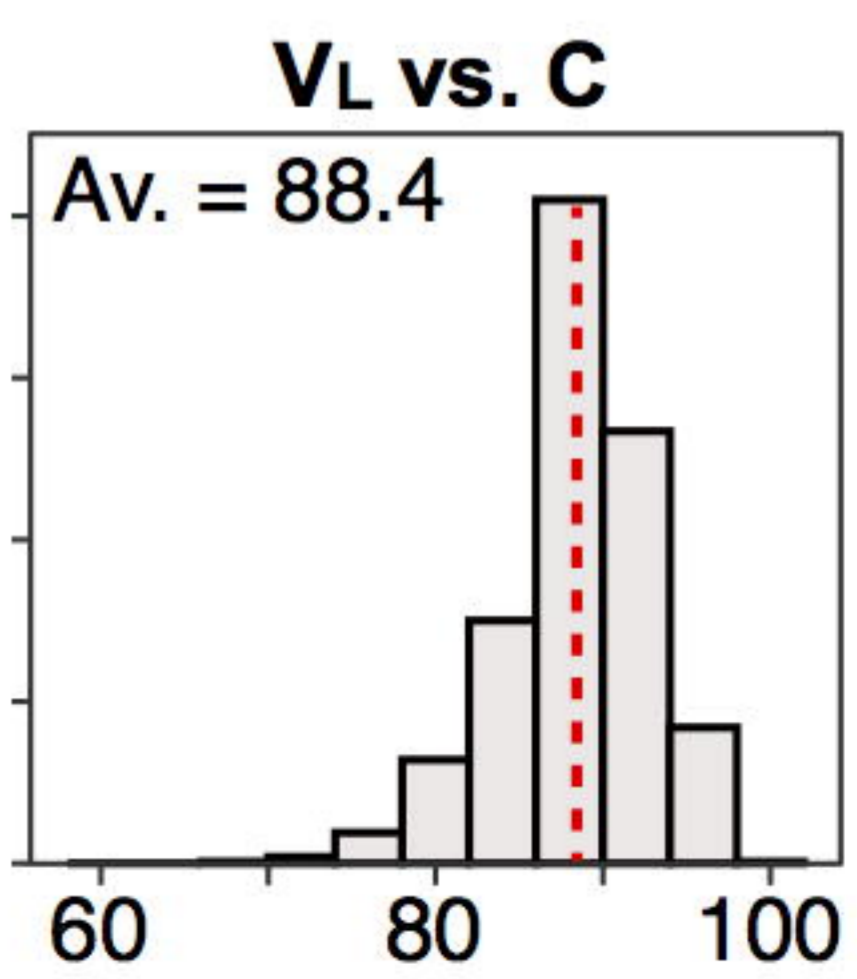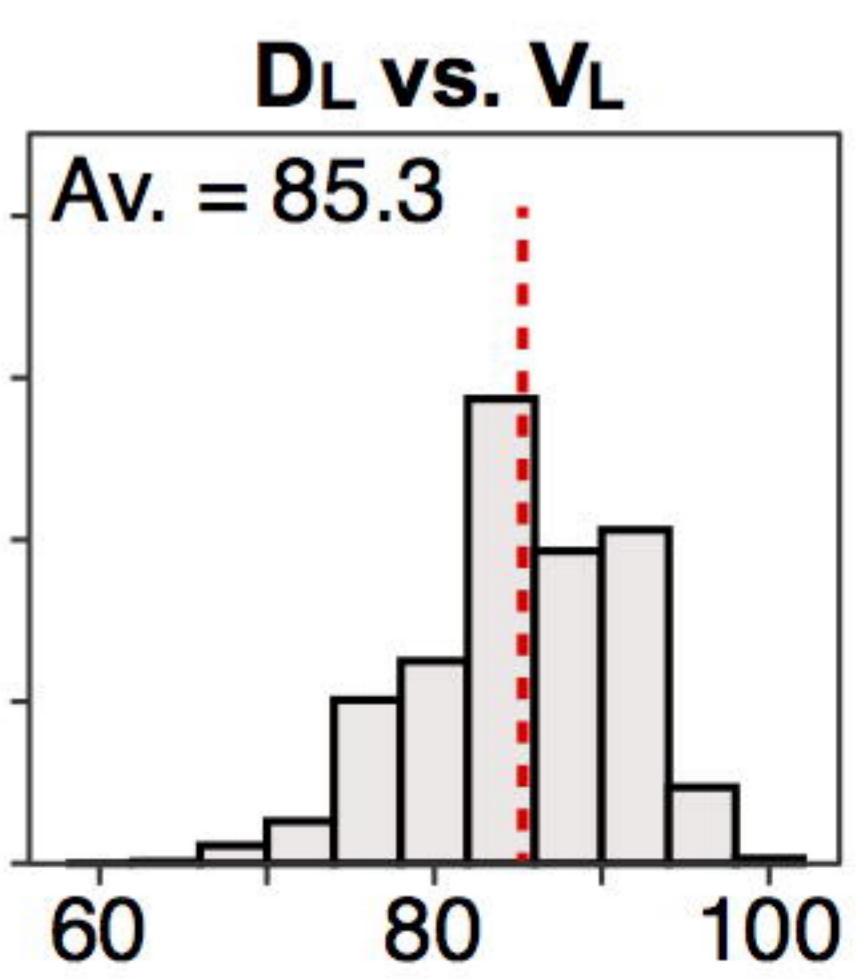

Prediction Accuracy (%)

bioRxiv preprint doi: <https://doi.org/10.1101/2021.02.09.430197>; this version posted February 9, 2021. The copyright holder for this preprint (which was not certified by peer review) is the author/funder, who has granted bioRxiv a license to display the preprint in perpetuity. It is made available under aCC-BY-NC-ND 4.0 International license.

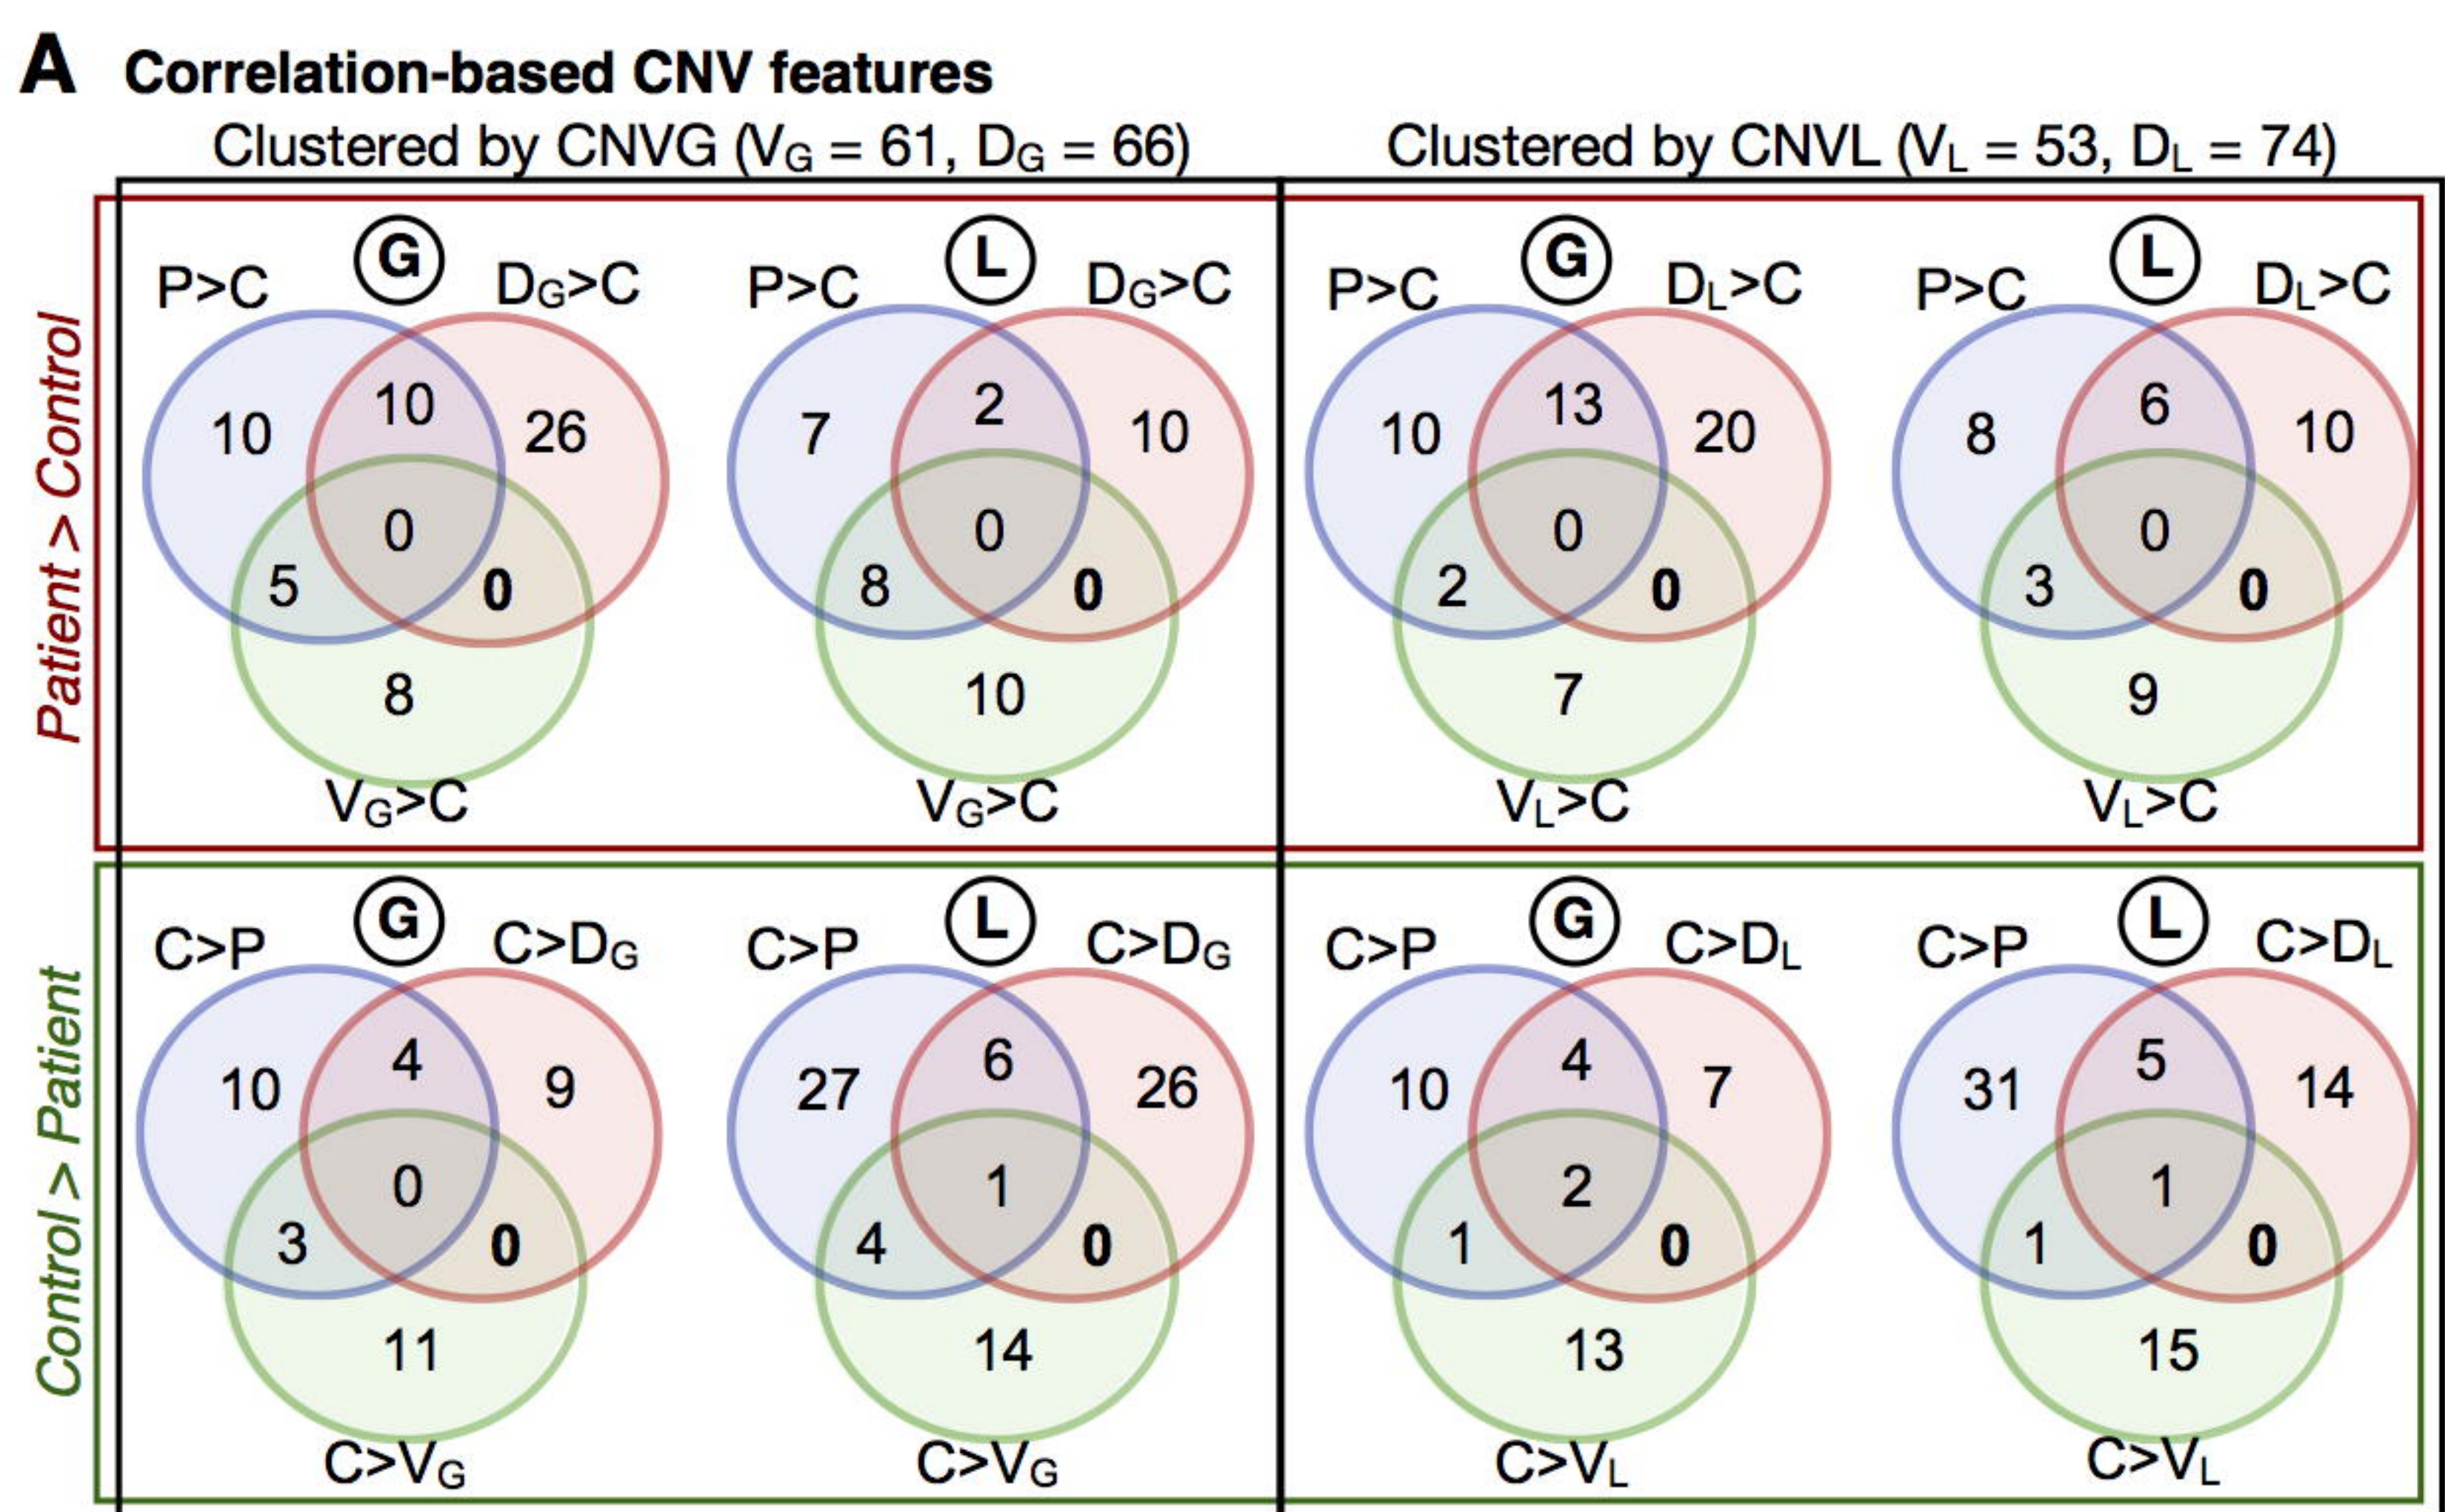

bioRxiv preprint doi: <https://doi.org/10.1101/2021.02.08.430168>; this version posted February 9, 2021. The copyright holder for this preprint (which was not certified by peer review) is the author/funder, who has granted bioRxiv a license to display the preprint in perpetuity. It is made available under aCC-BY-NC-ND 4.0 International license.

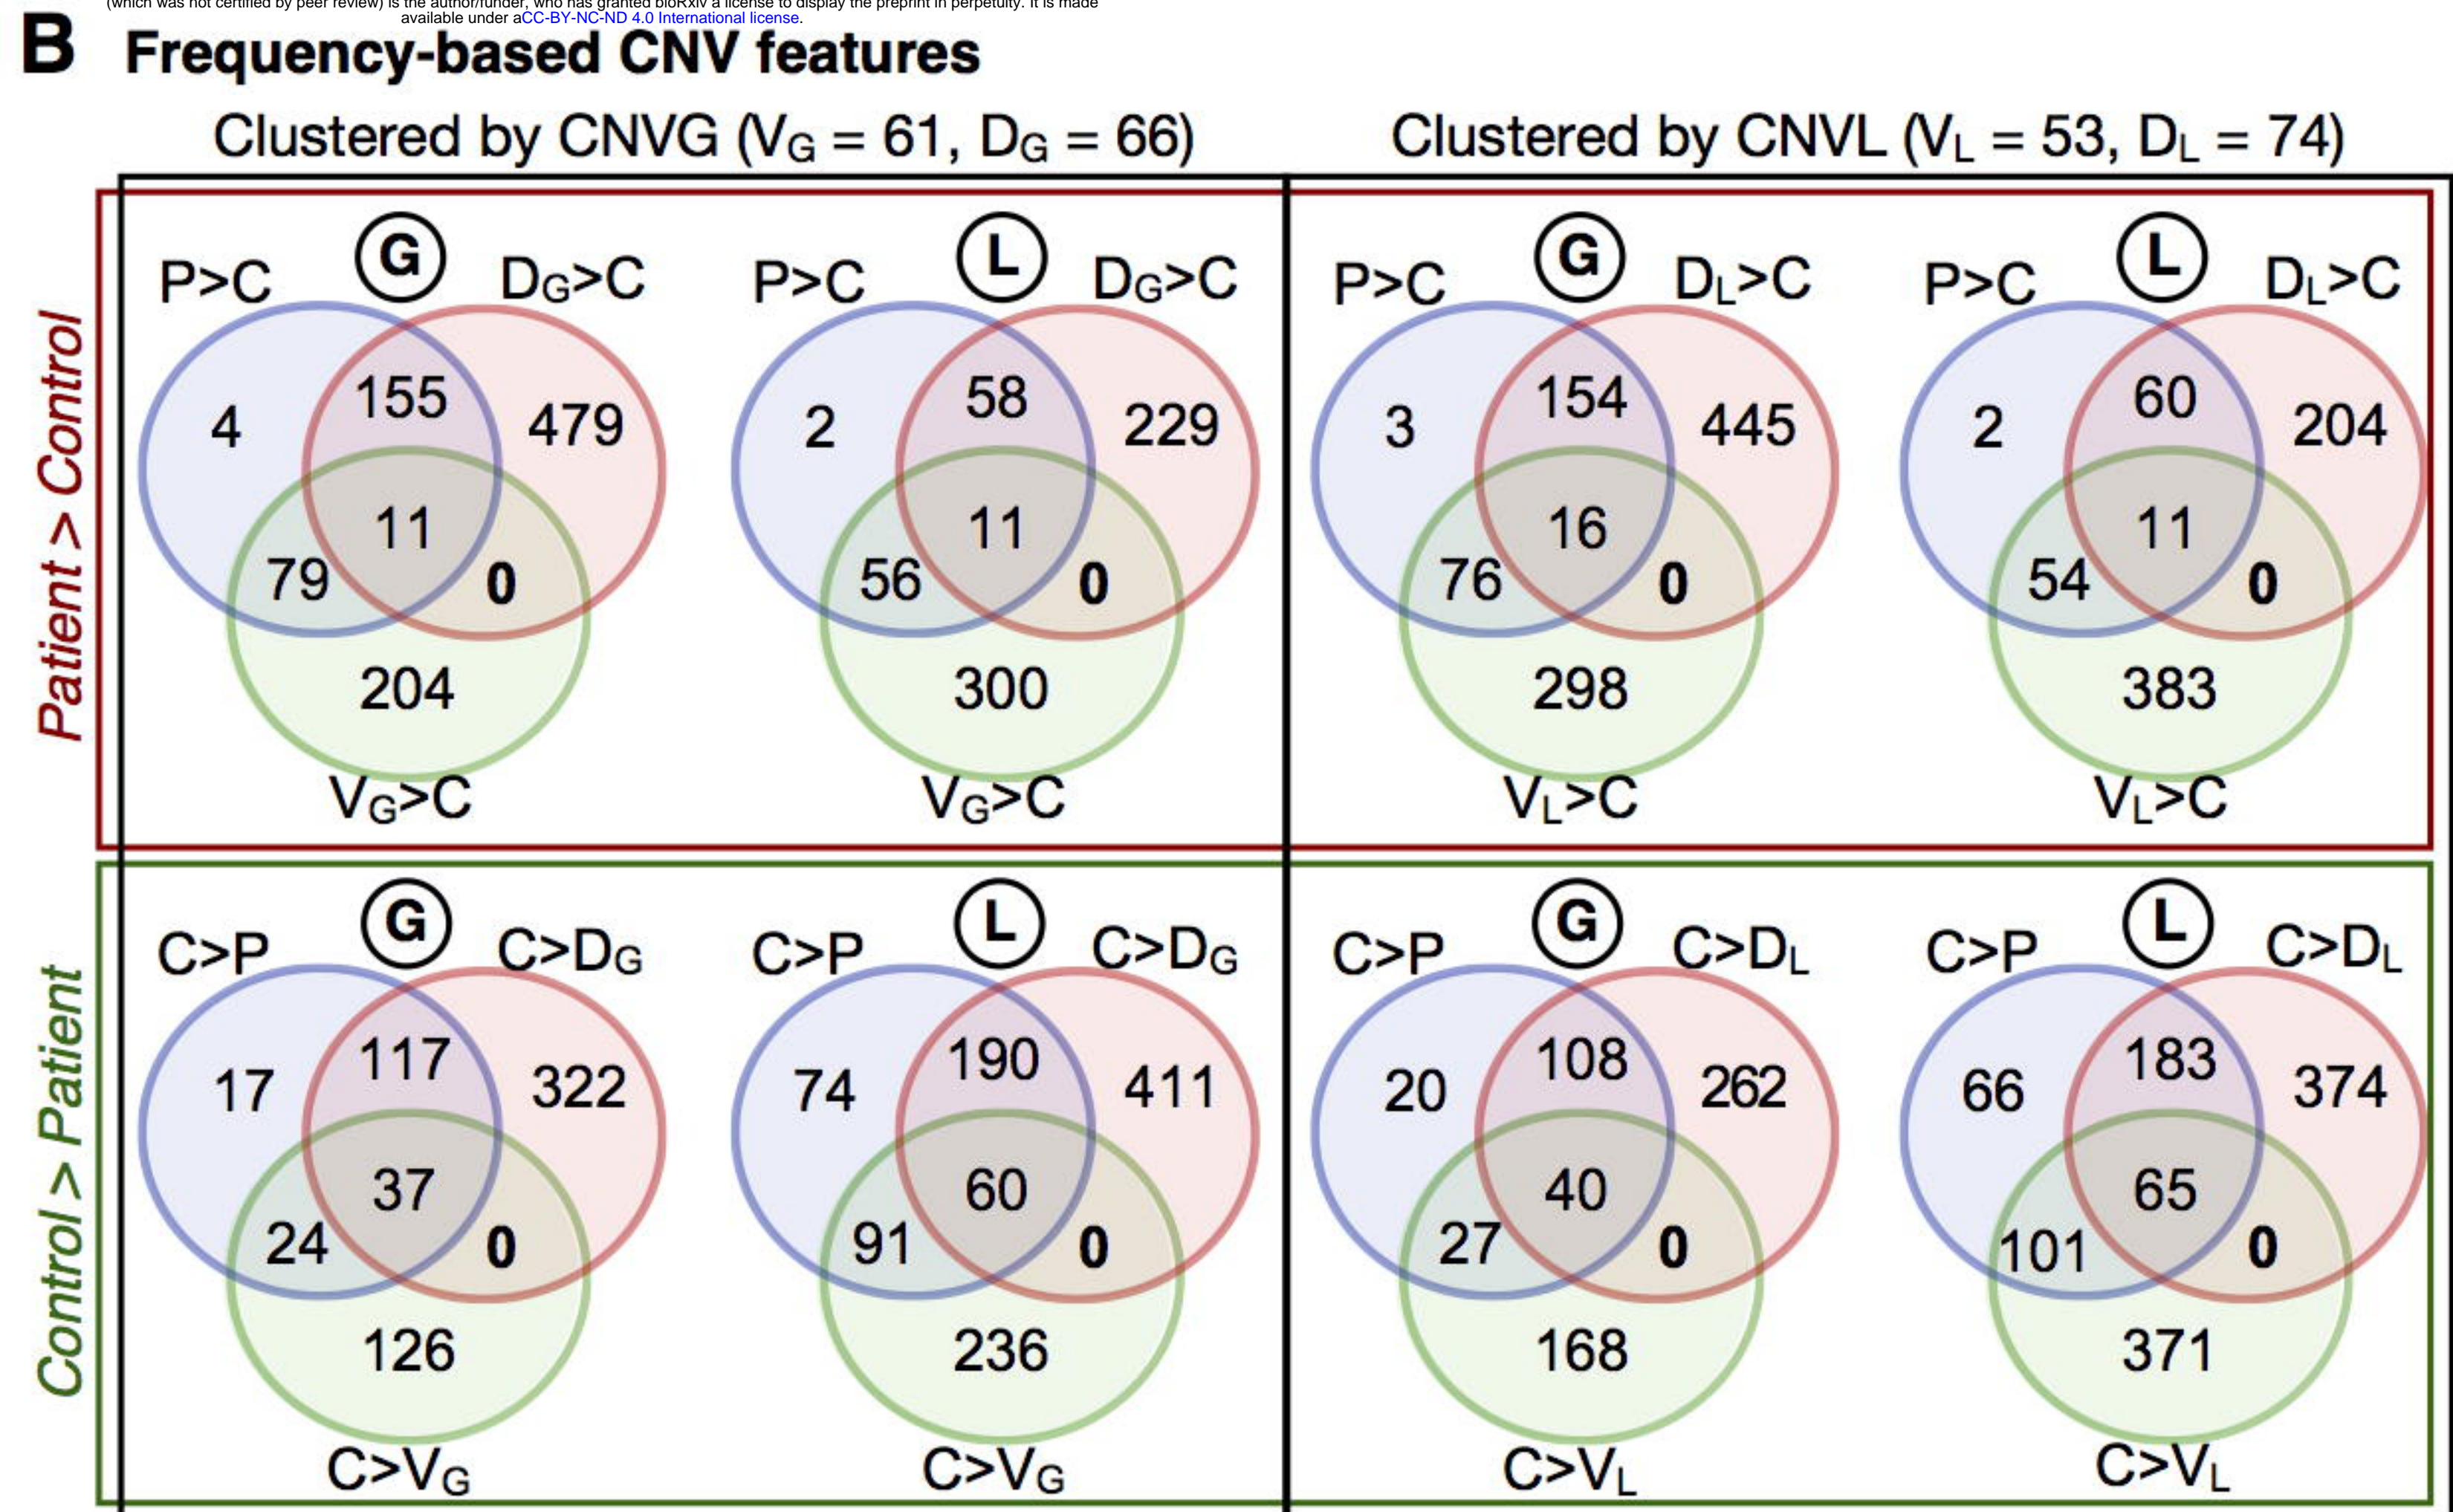



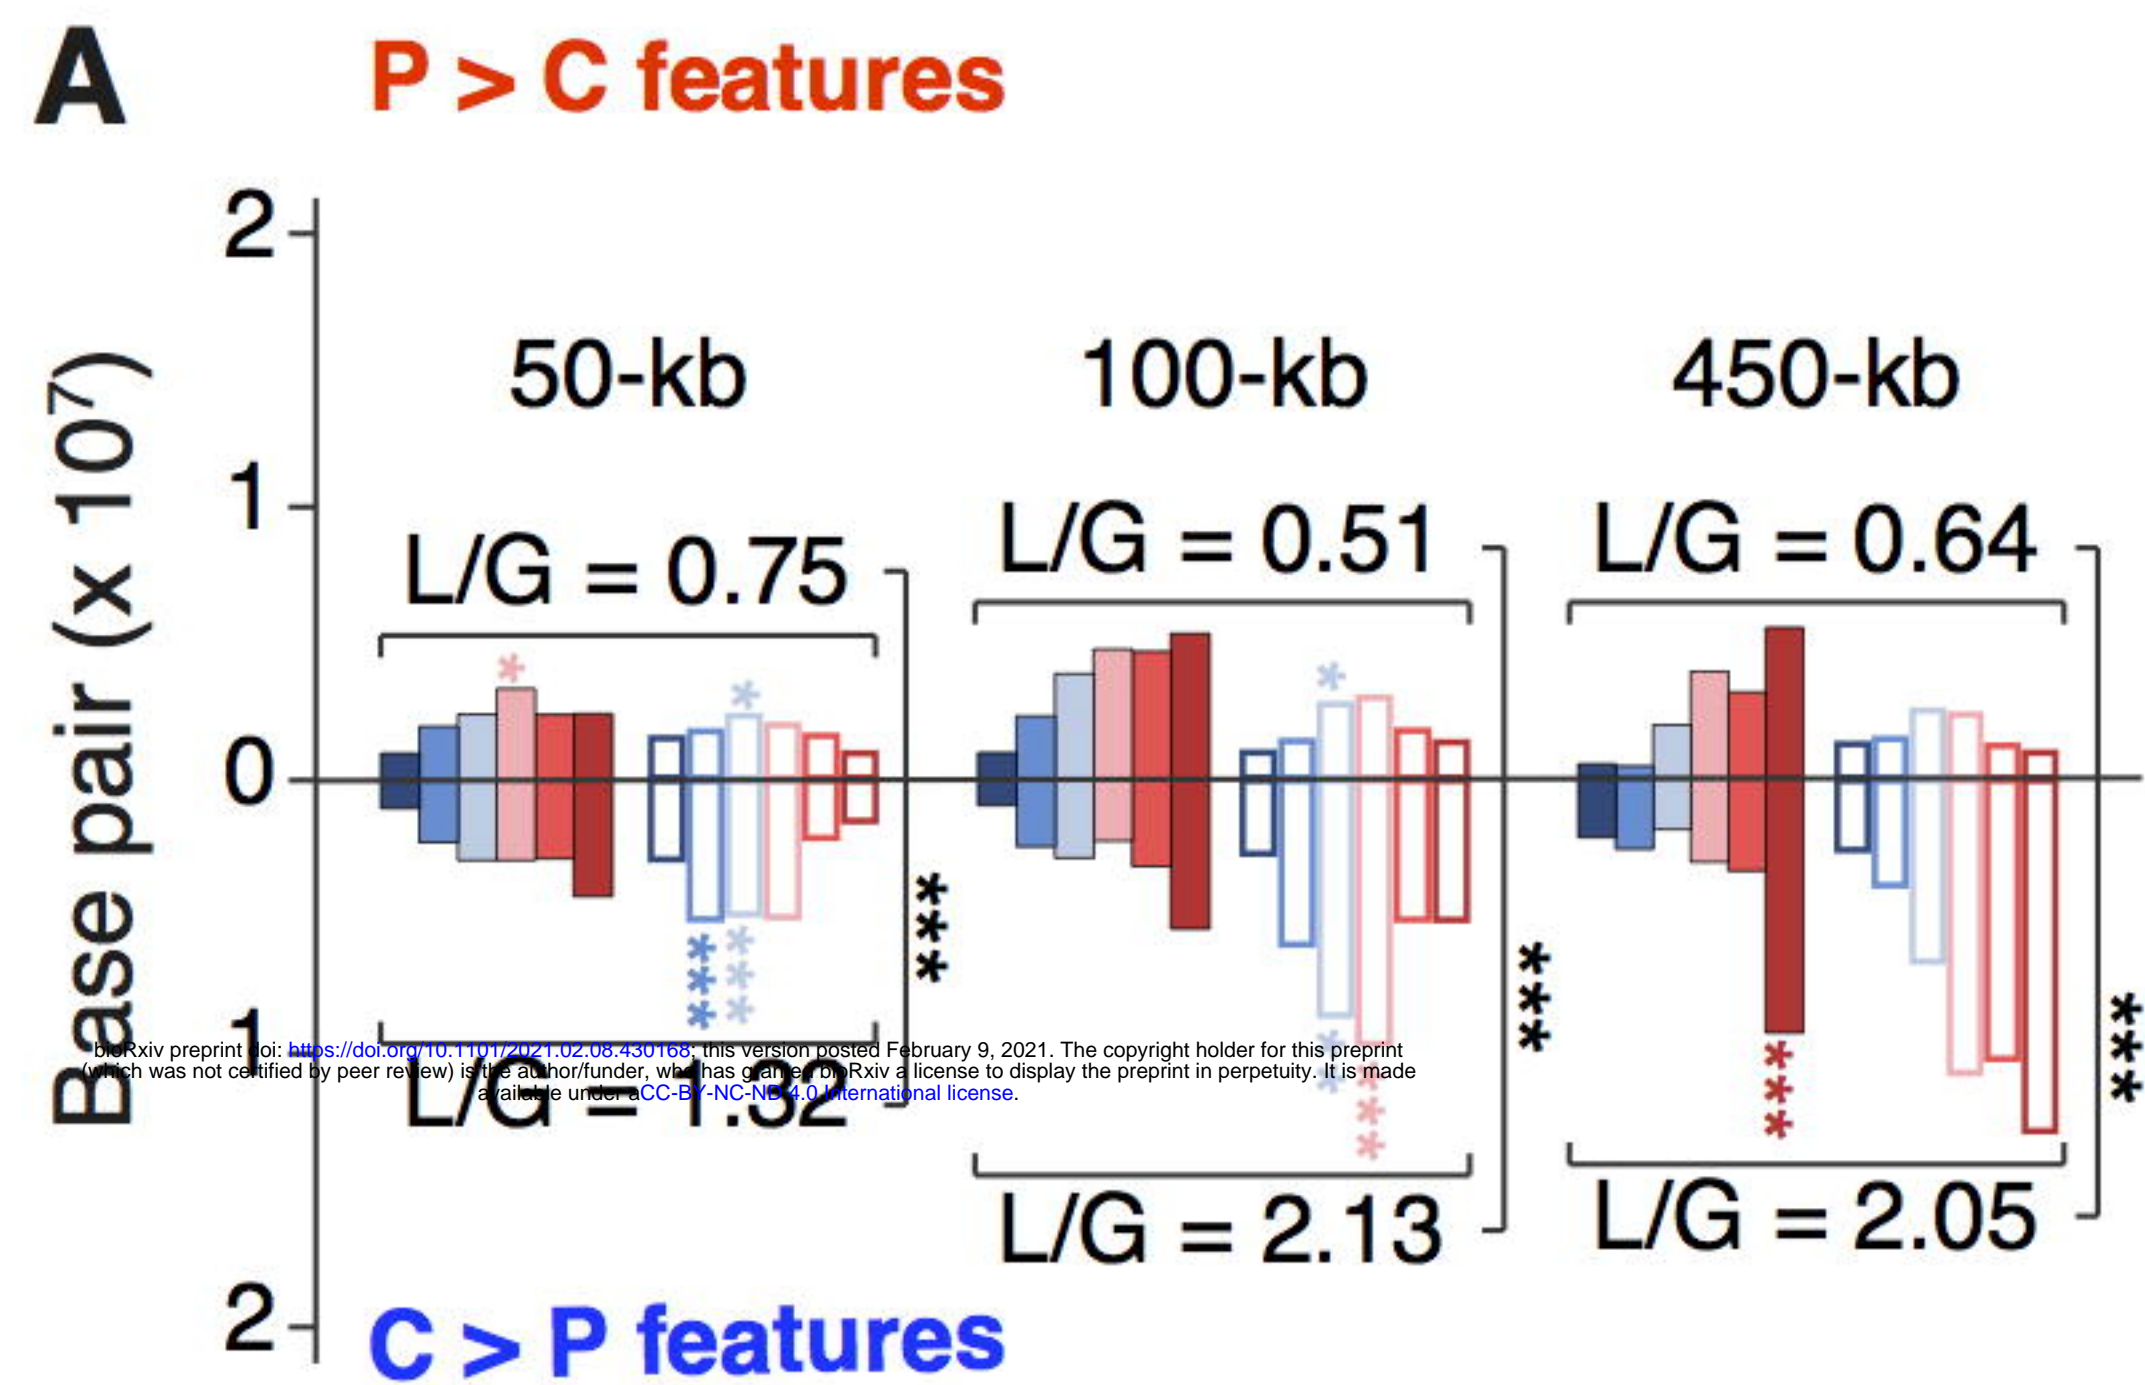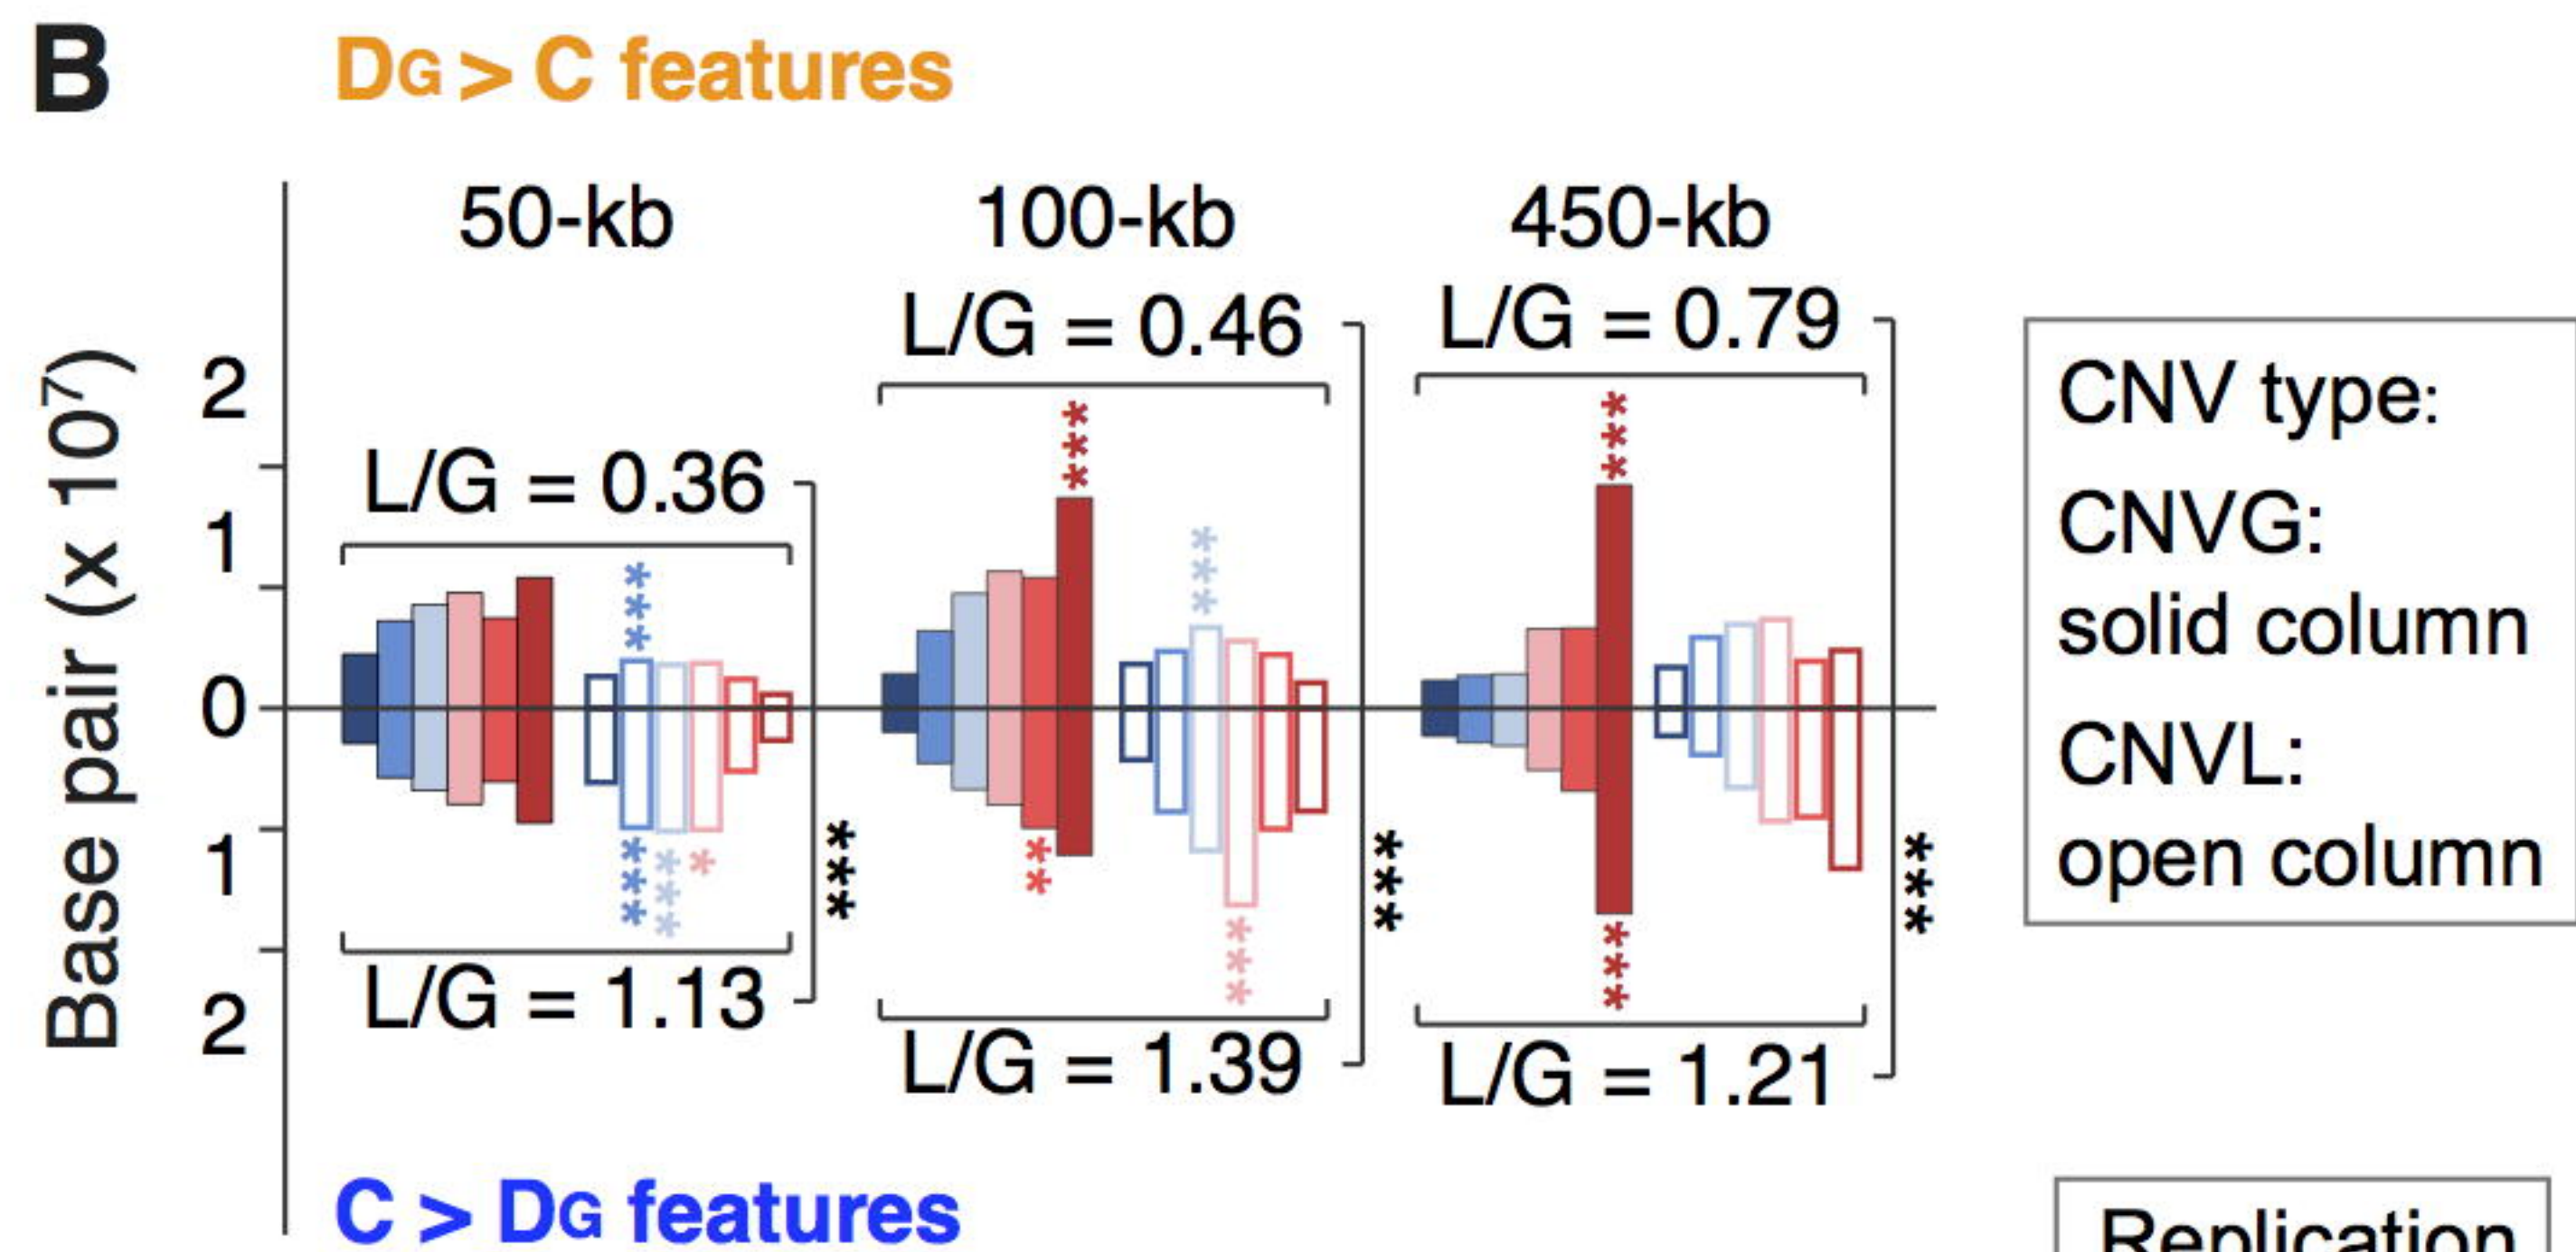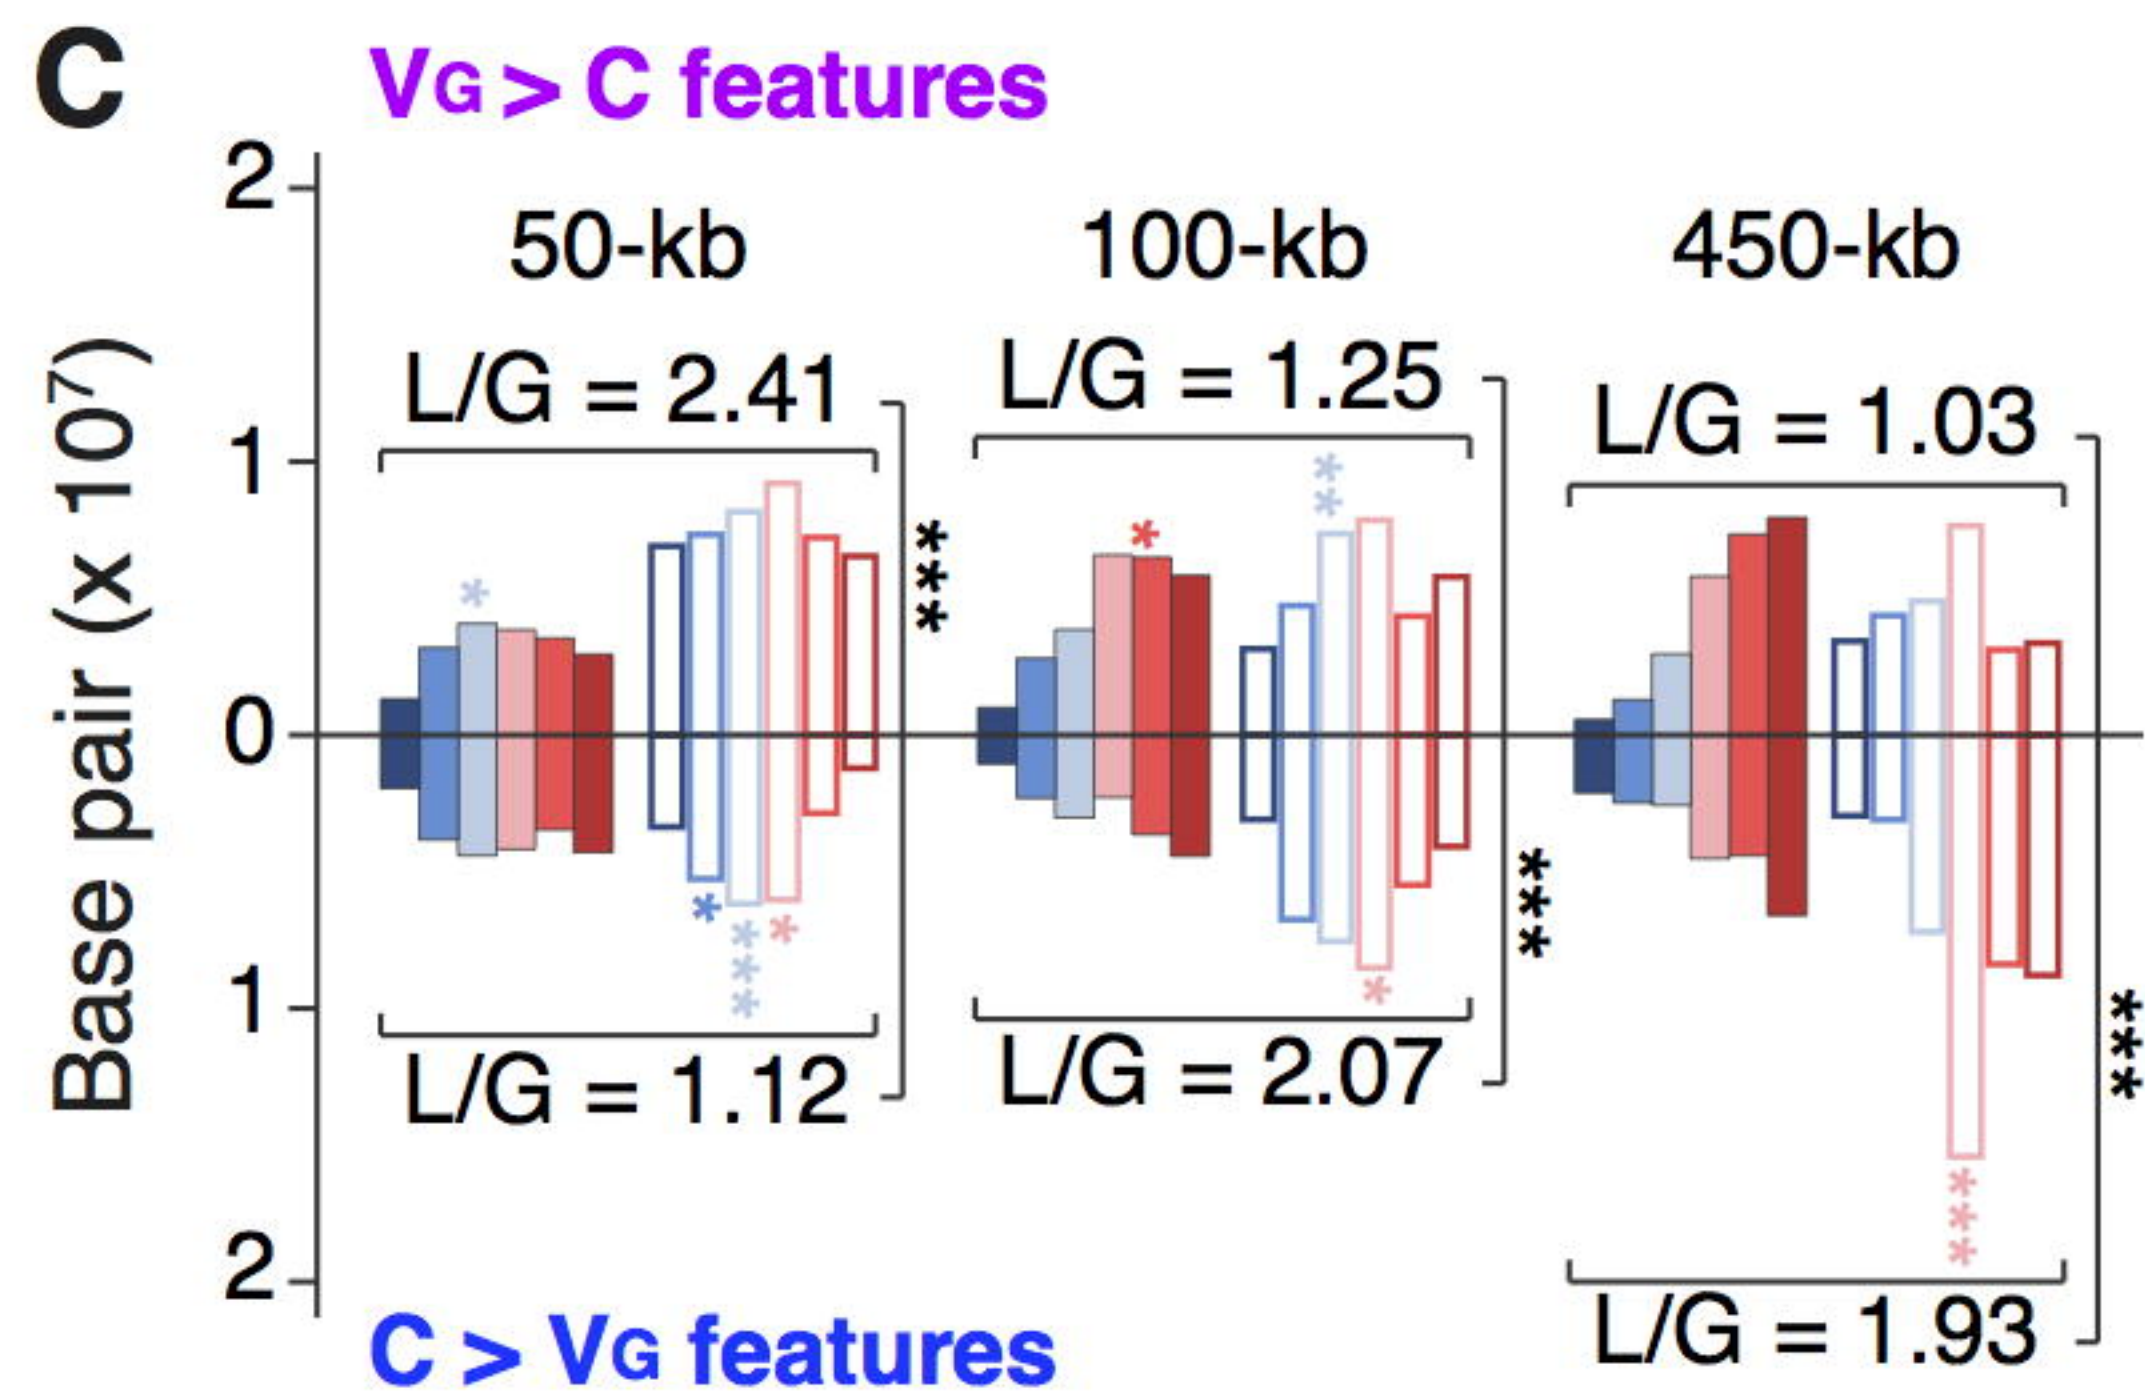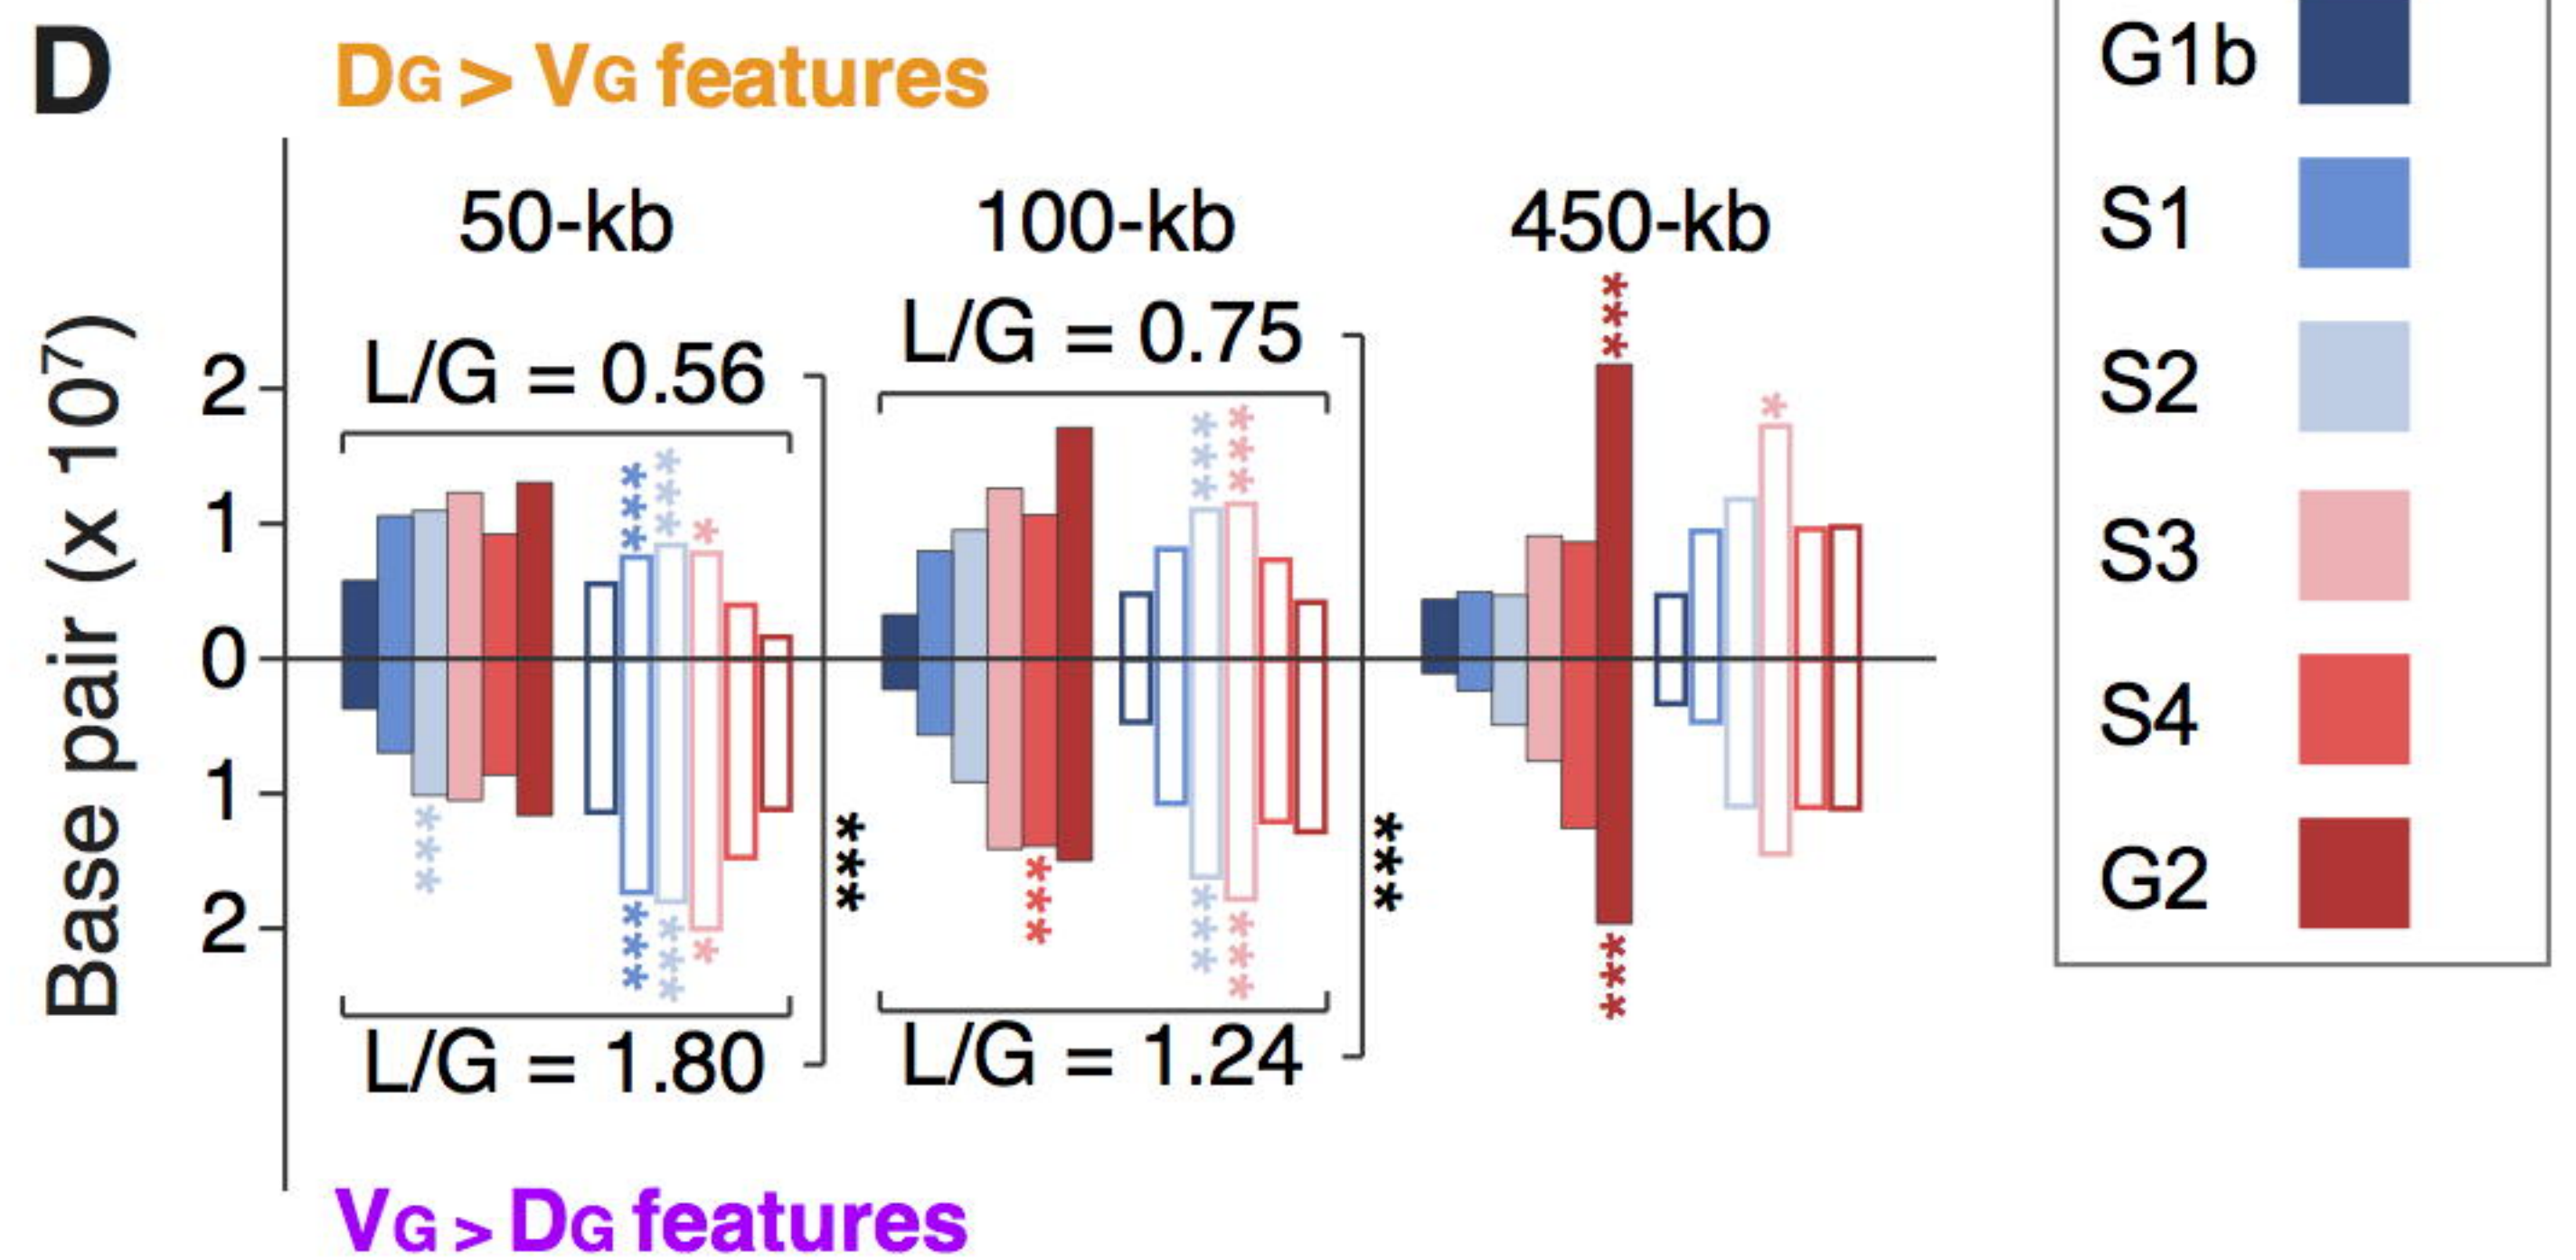

A

## Chromosome 2: Steroid hormone biosynthesis

bioRxiv preprint doi: <https://doi.org/10.1101/2021.02.08.430168>; this version posted February 9, 2021. The copyright holder for this preprint (which was not certified by peer review) is the author/funder, who has granted bioRxiv a license to display the preprint in perpetuity. It is made available under aCC-BY-NC-ND 4.0 International license.

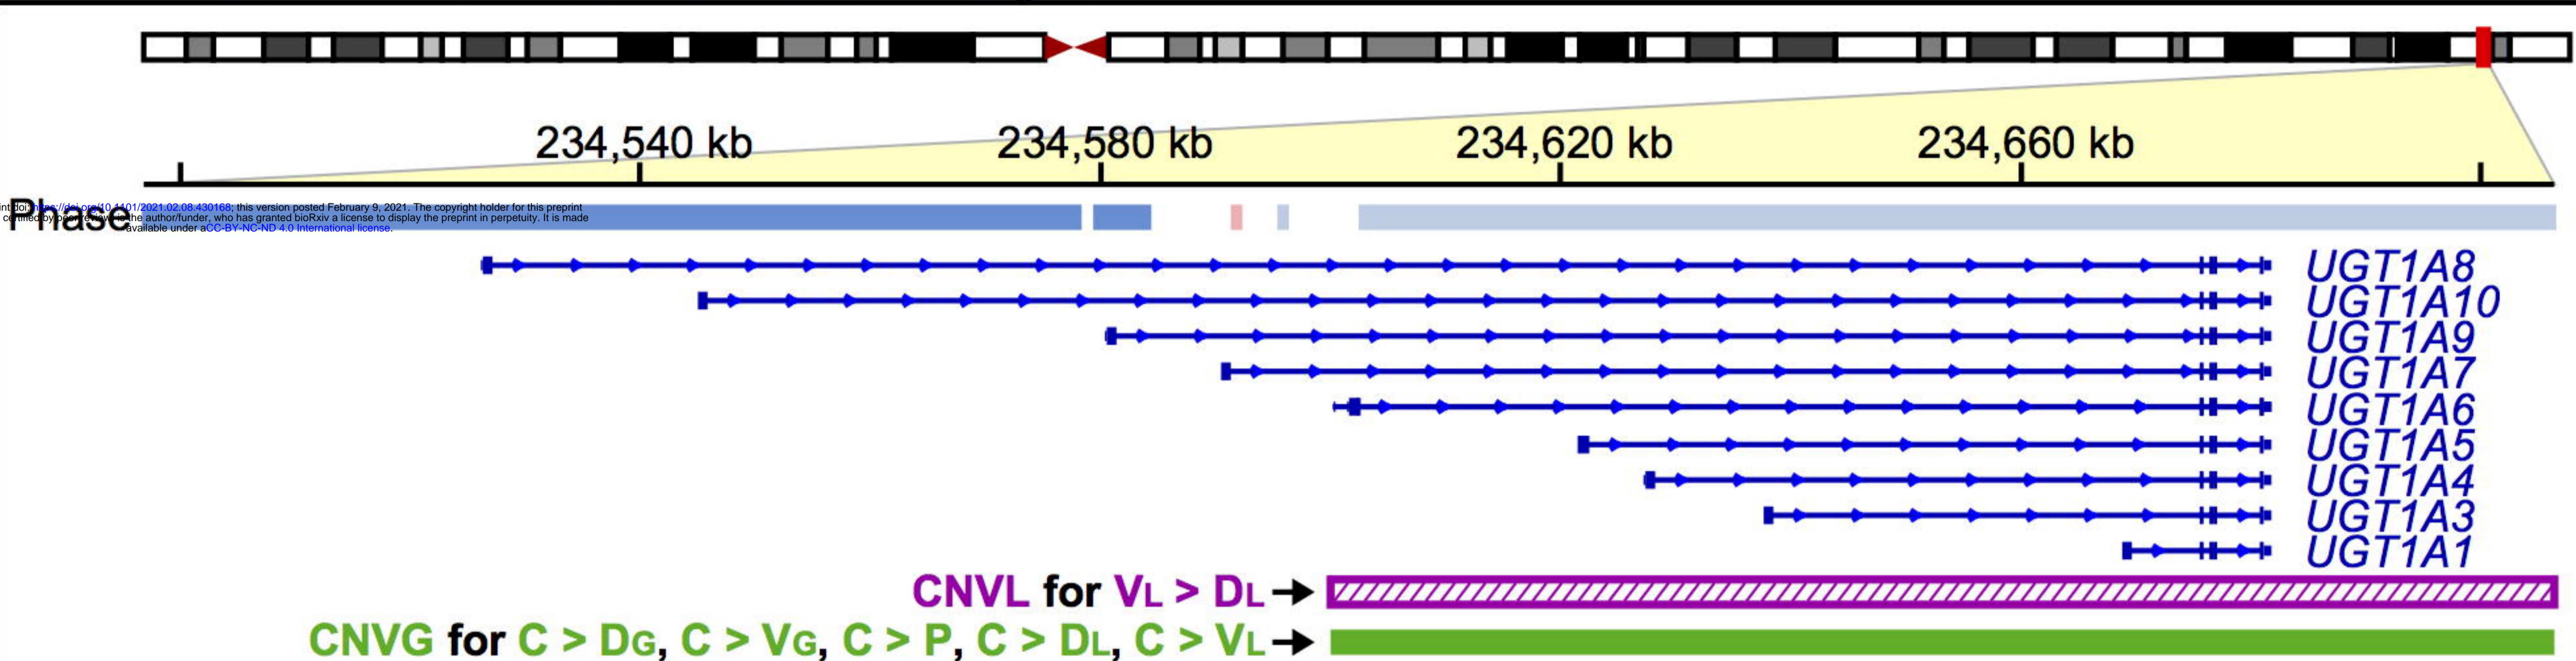

Replication  
Phase:

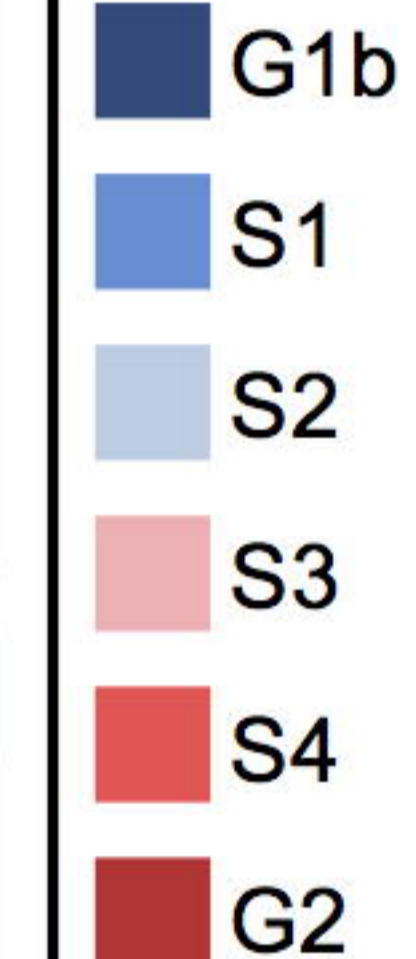

## Chromosome 7: Steroid hormone biosynthesis

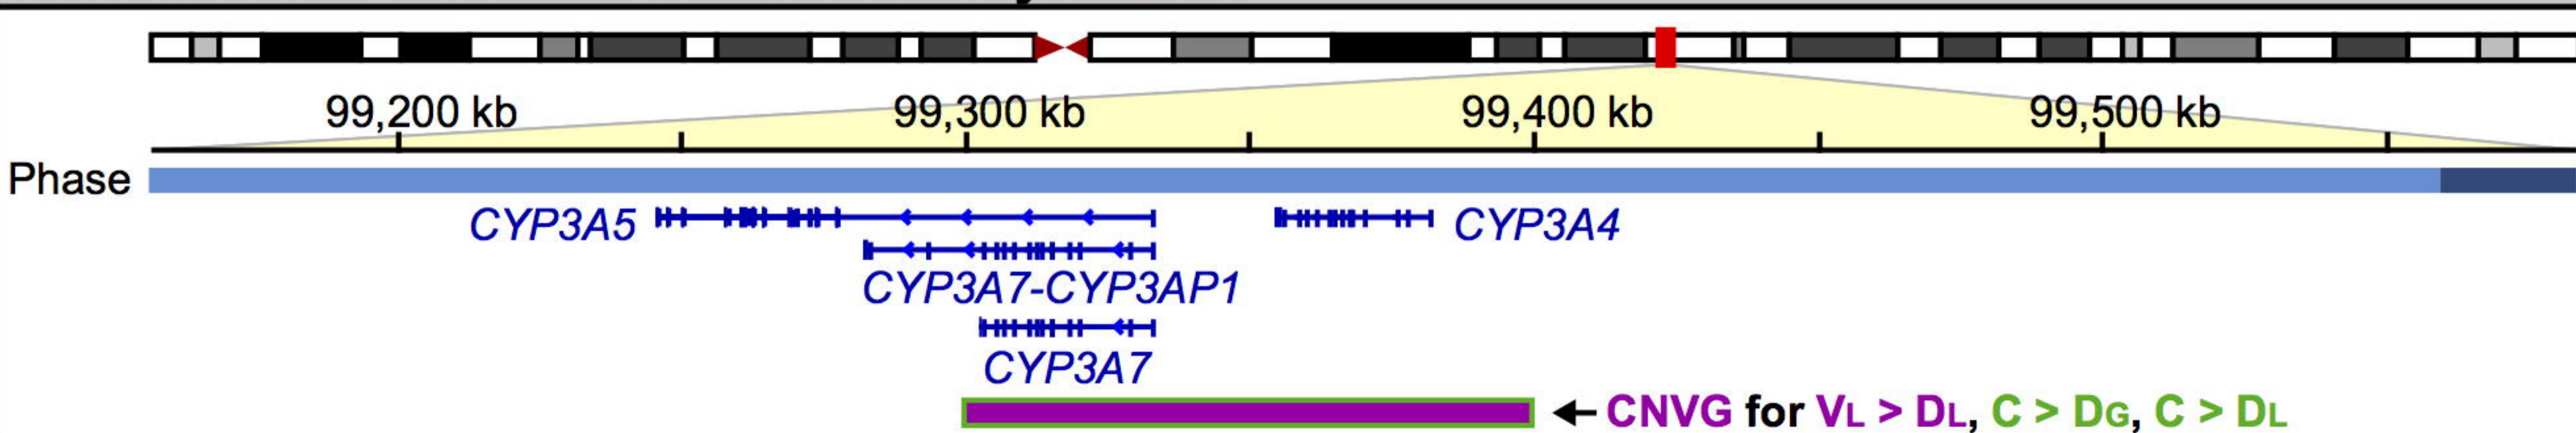

**B**

**Chromosome 5: Glutamatergic synapse, Nicotine addiction**

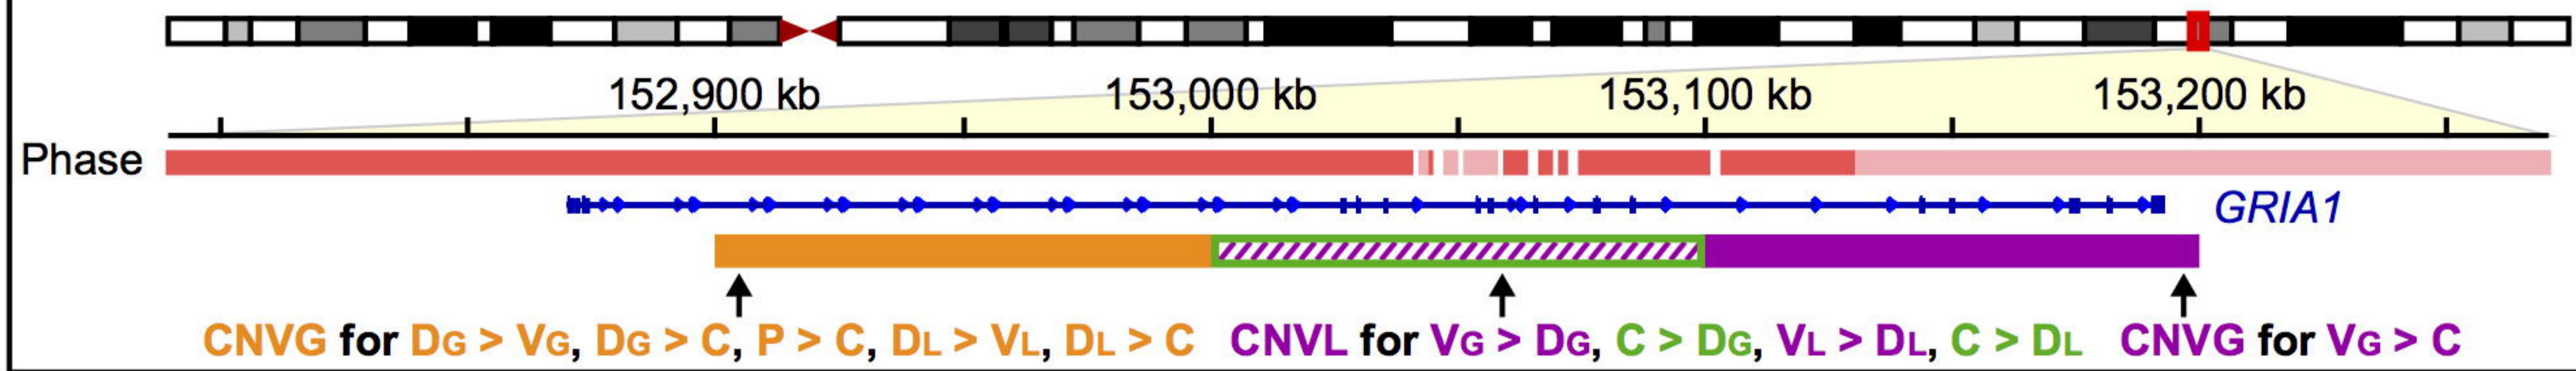

**Chromosome 11: Glutamatergic synapse, Nicotine addiction**

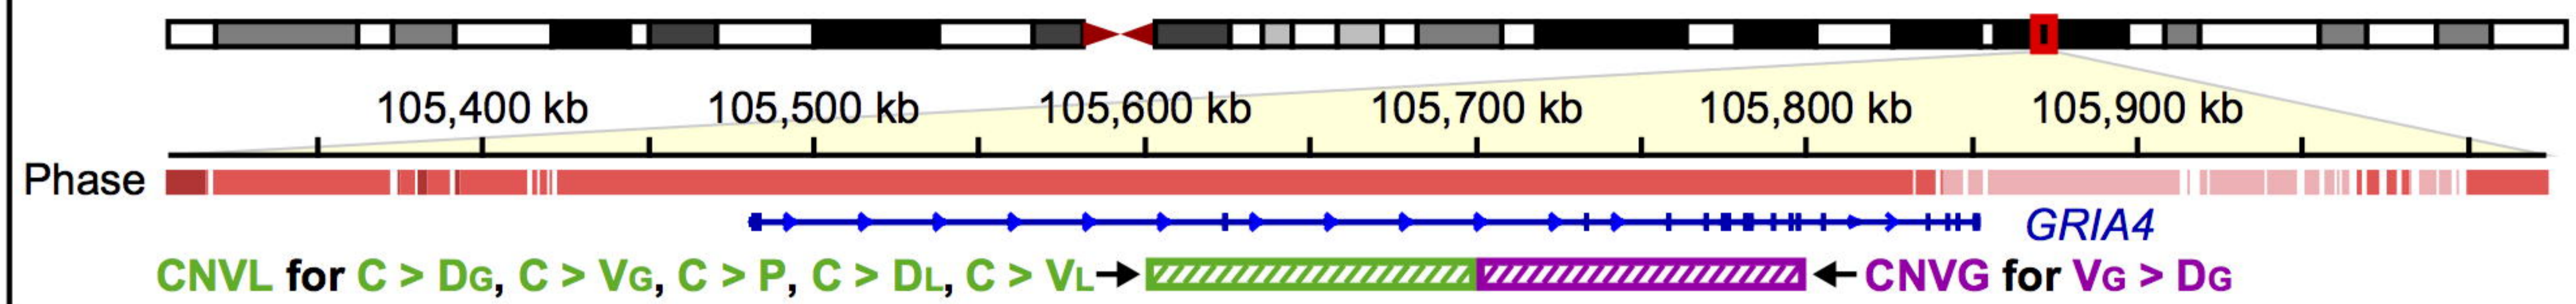

**Chromosome 12: Glutamatergic synapse, Nicotine addiction**

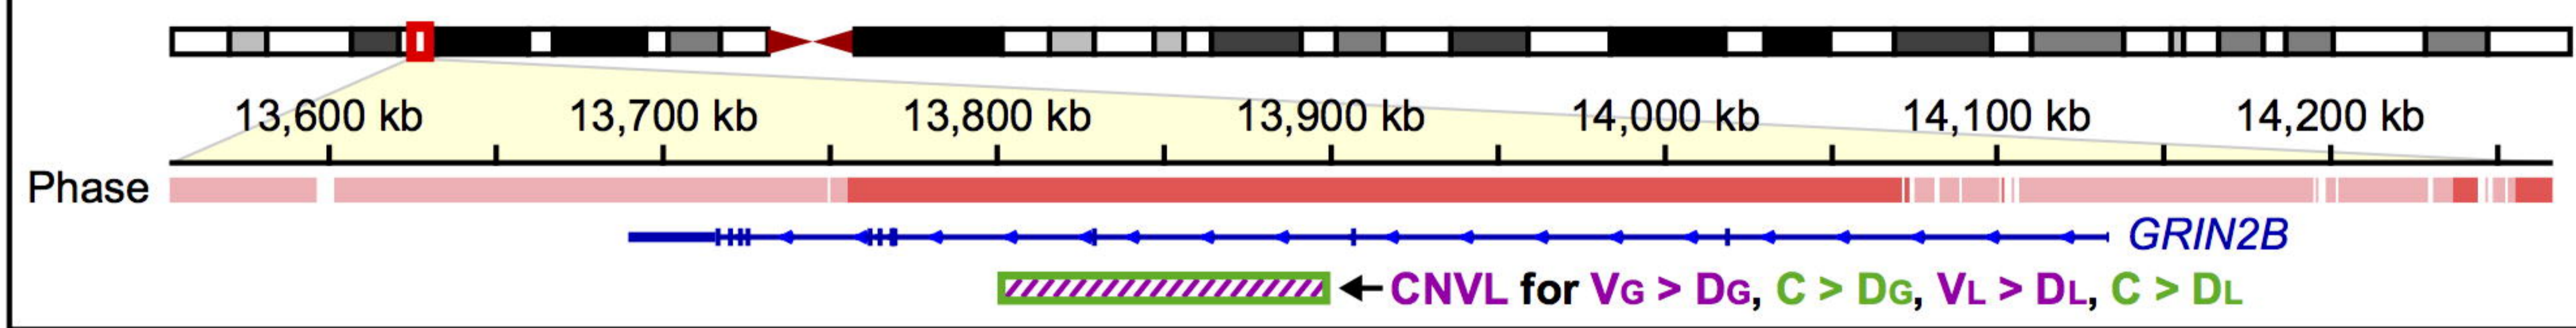

**Chromosome 16: Glutamatergic synapse, Nicotine addiction**

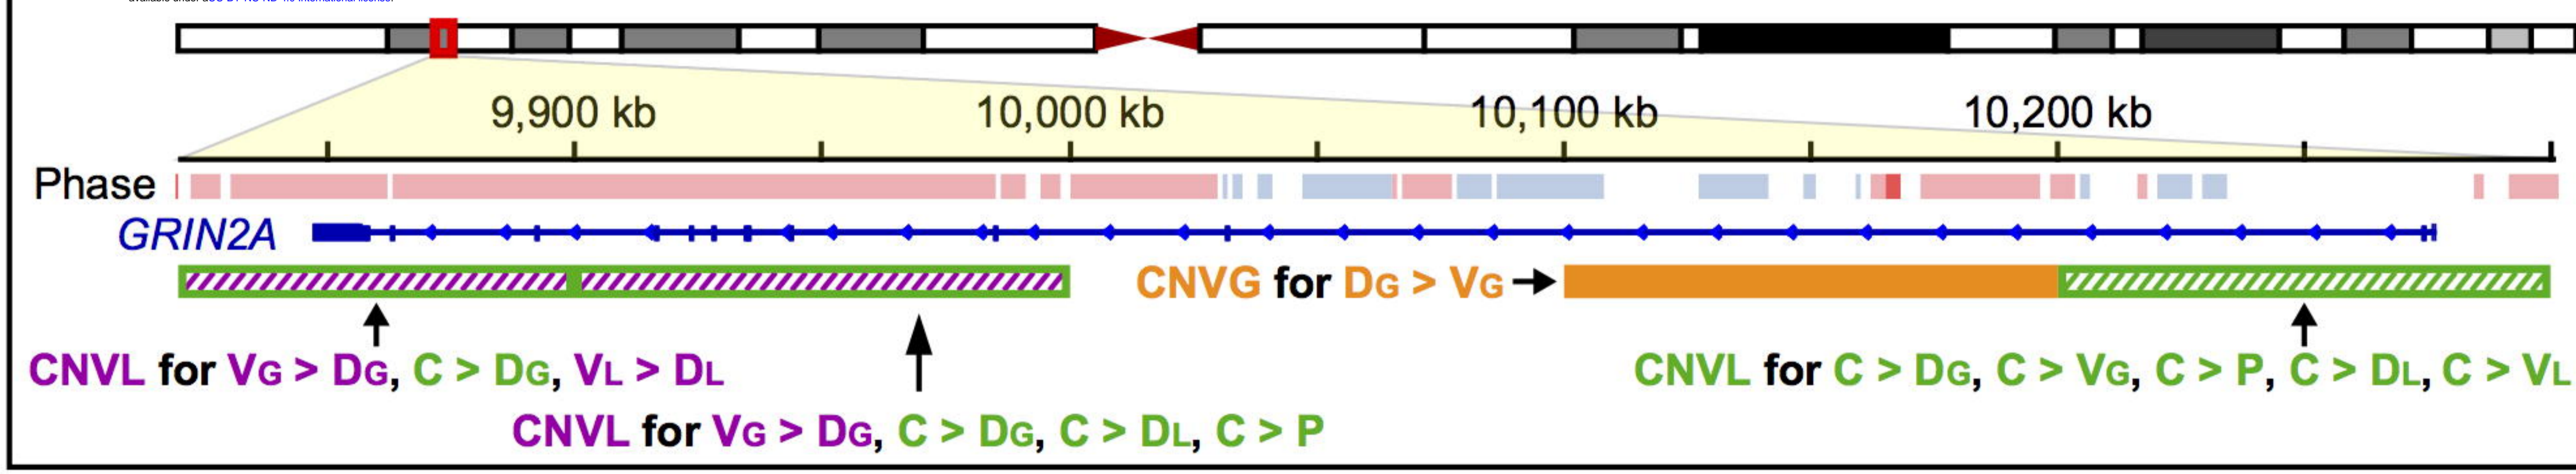

**Chromosome 17: Glutamatergic synapse, Nicotine addiction**

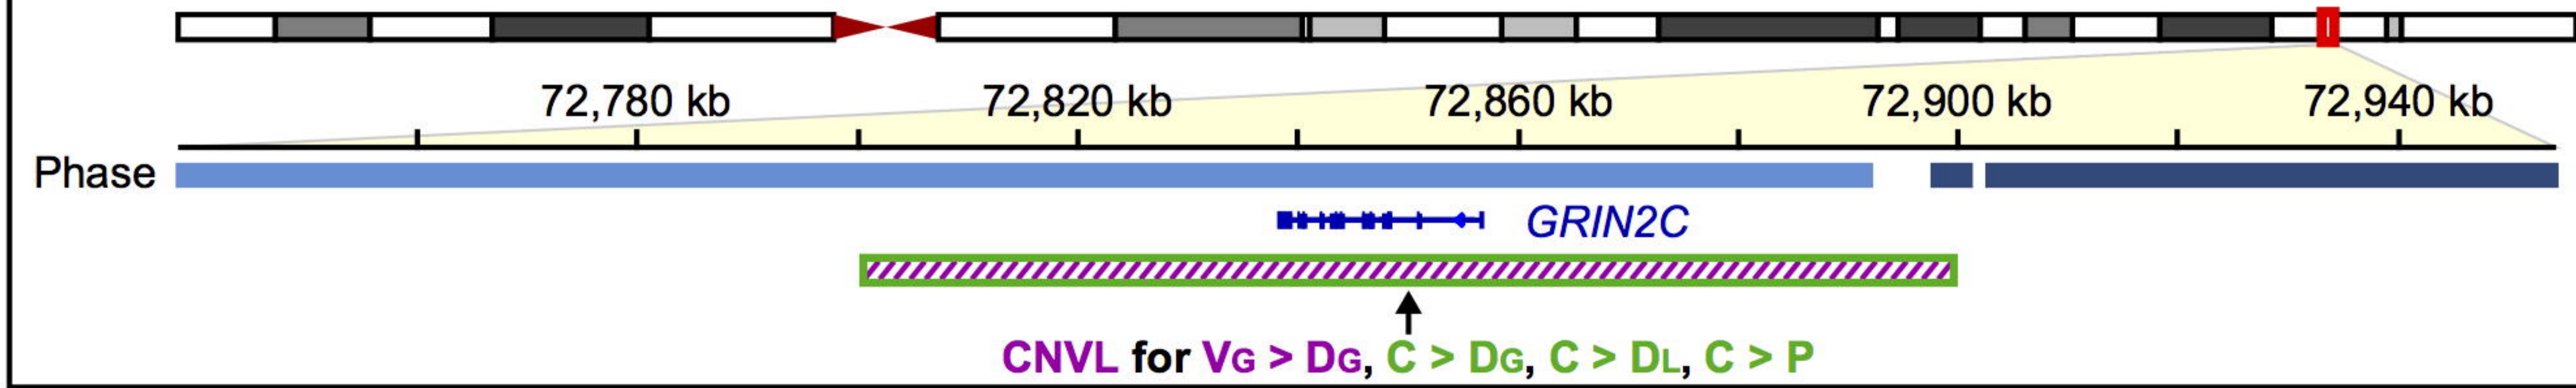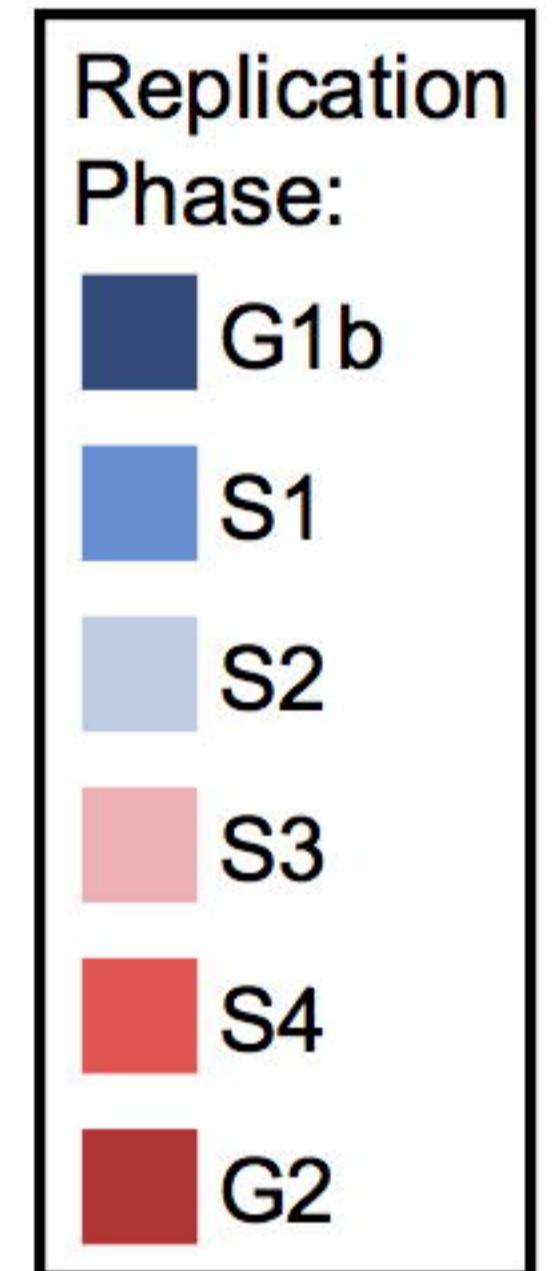

bioRxiv preprint doi: <https://doi.org/10.1101/2021.02.04.431111>; this version posted February 4, 2021. The copyright holder for this preprint (which was not certified by peer review) is the author/funder, who has granted bioRxiv a license to display the preprint in perpetuity. It is made available under aCC-BY-NC-ND 4.0 International license.

**C****Chromosome 6:**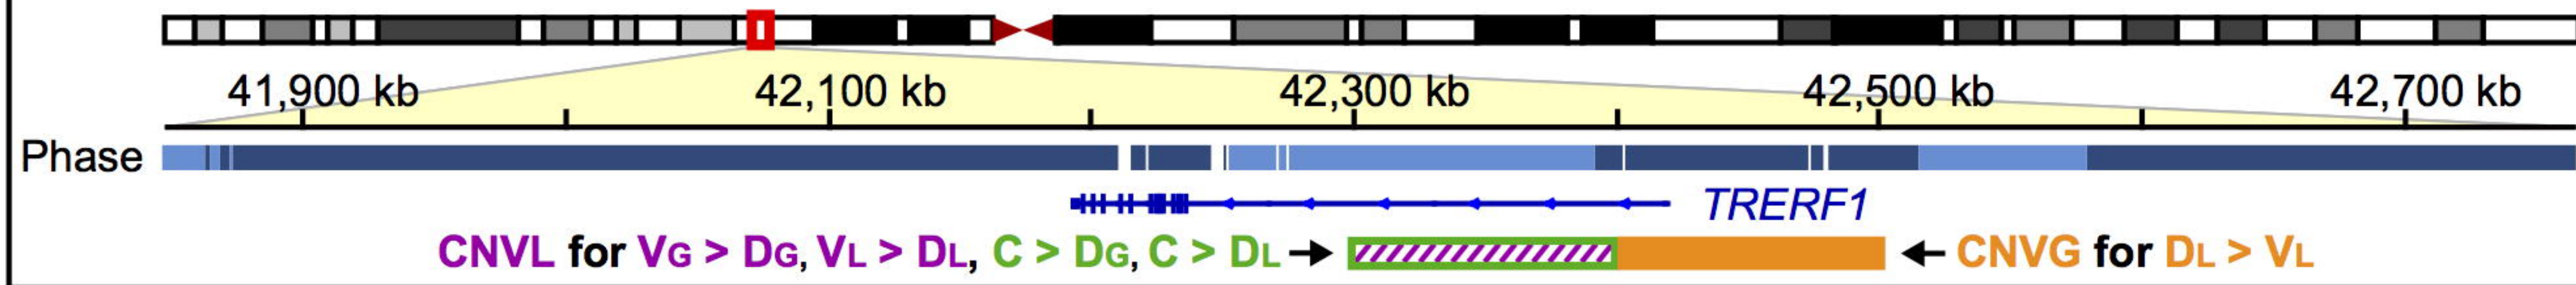**Chromosome X:**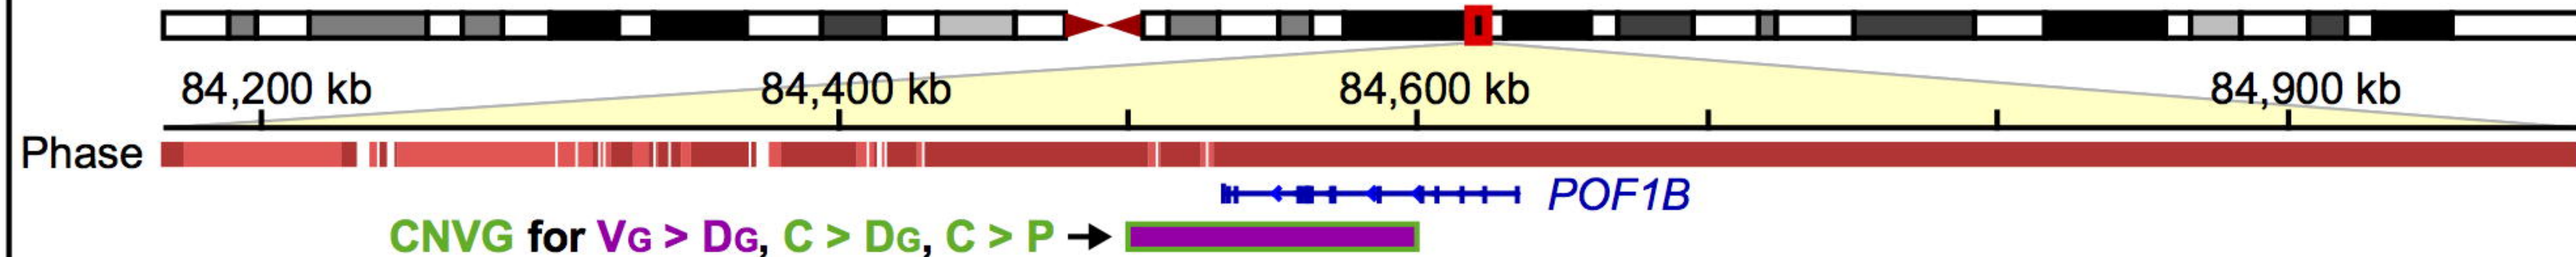Replication  
Phase:

- G1b
- S1
- S2
- S3
- S4
- G2

### Group 1-favoring CNVG features

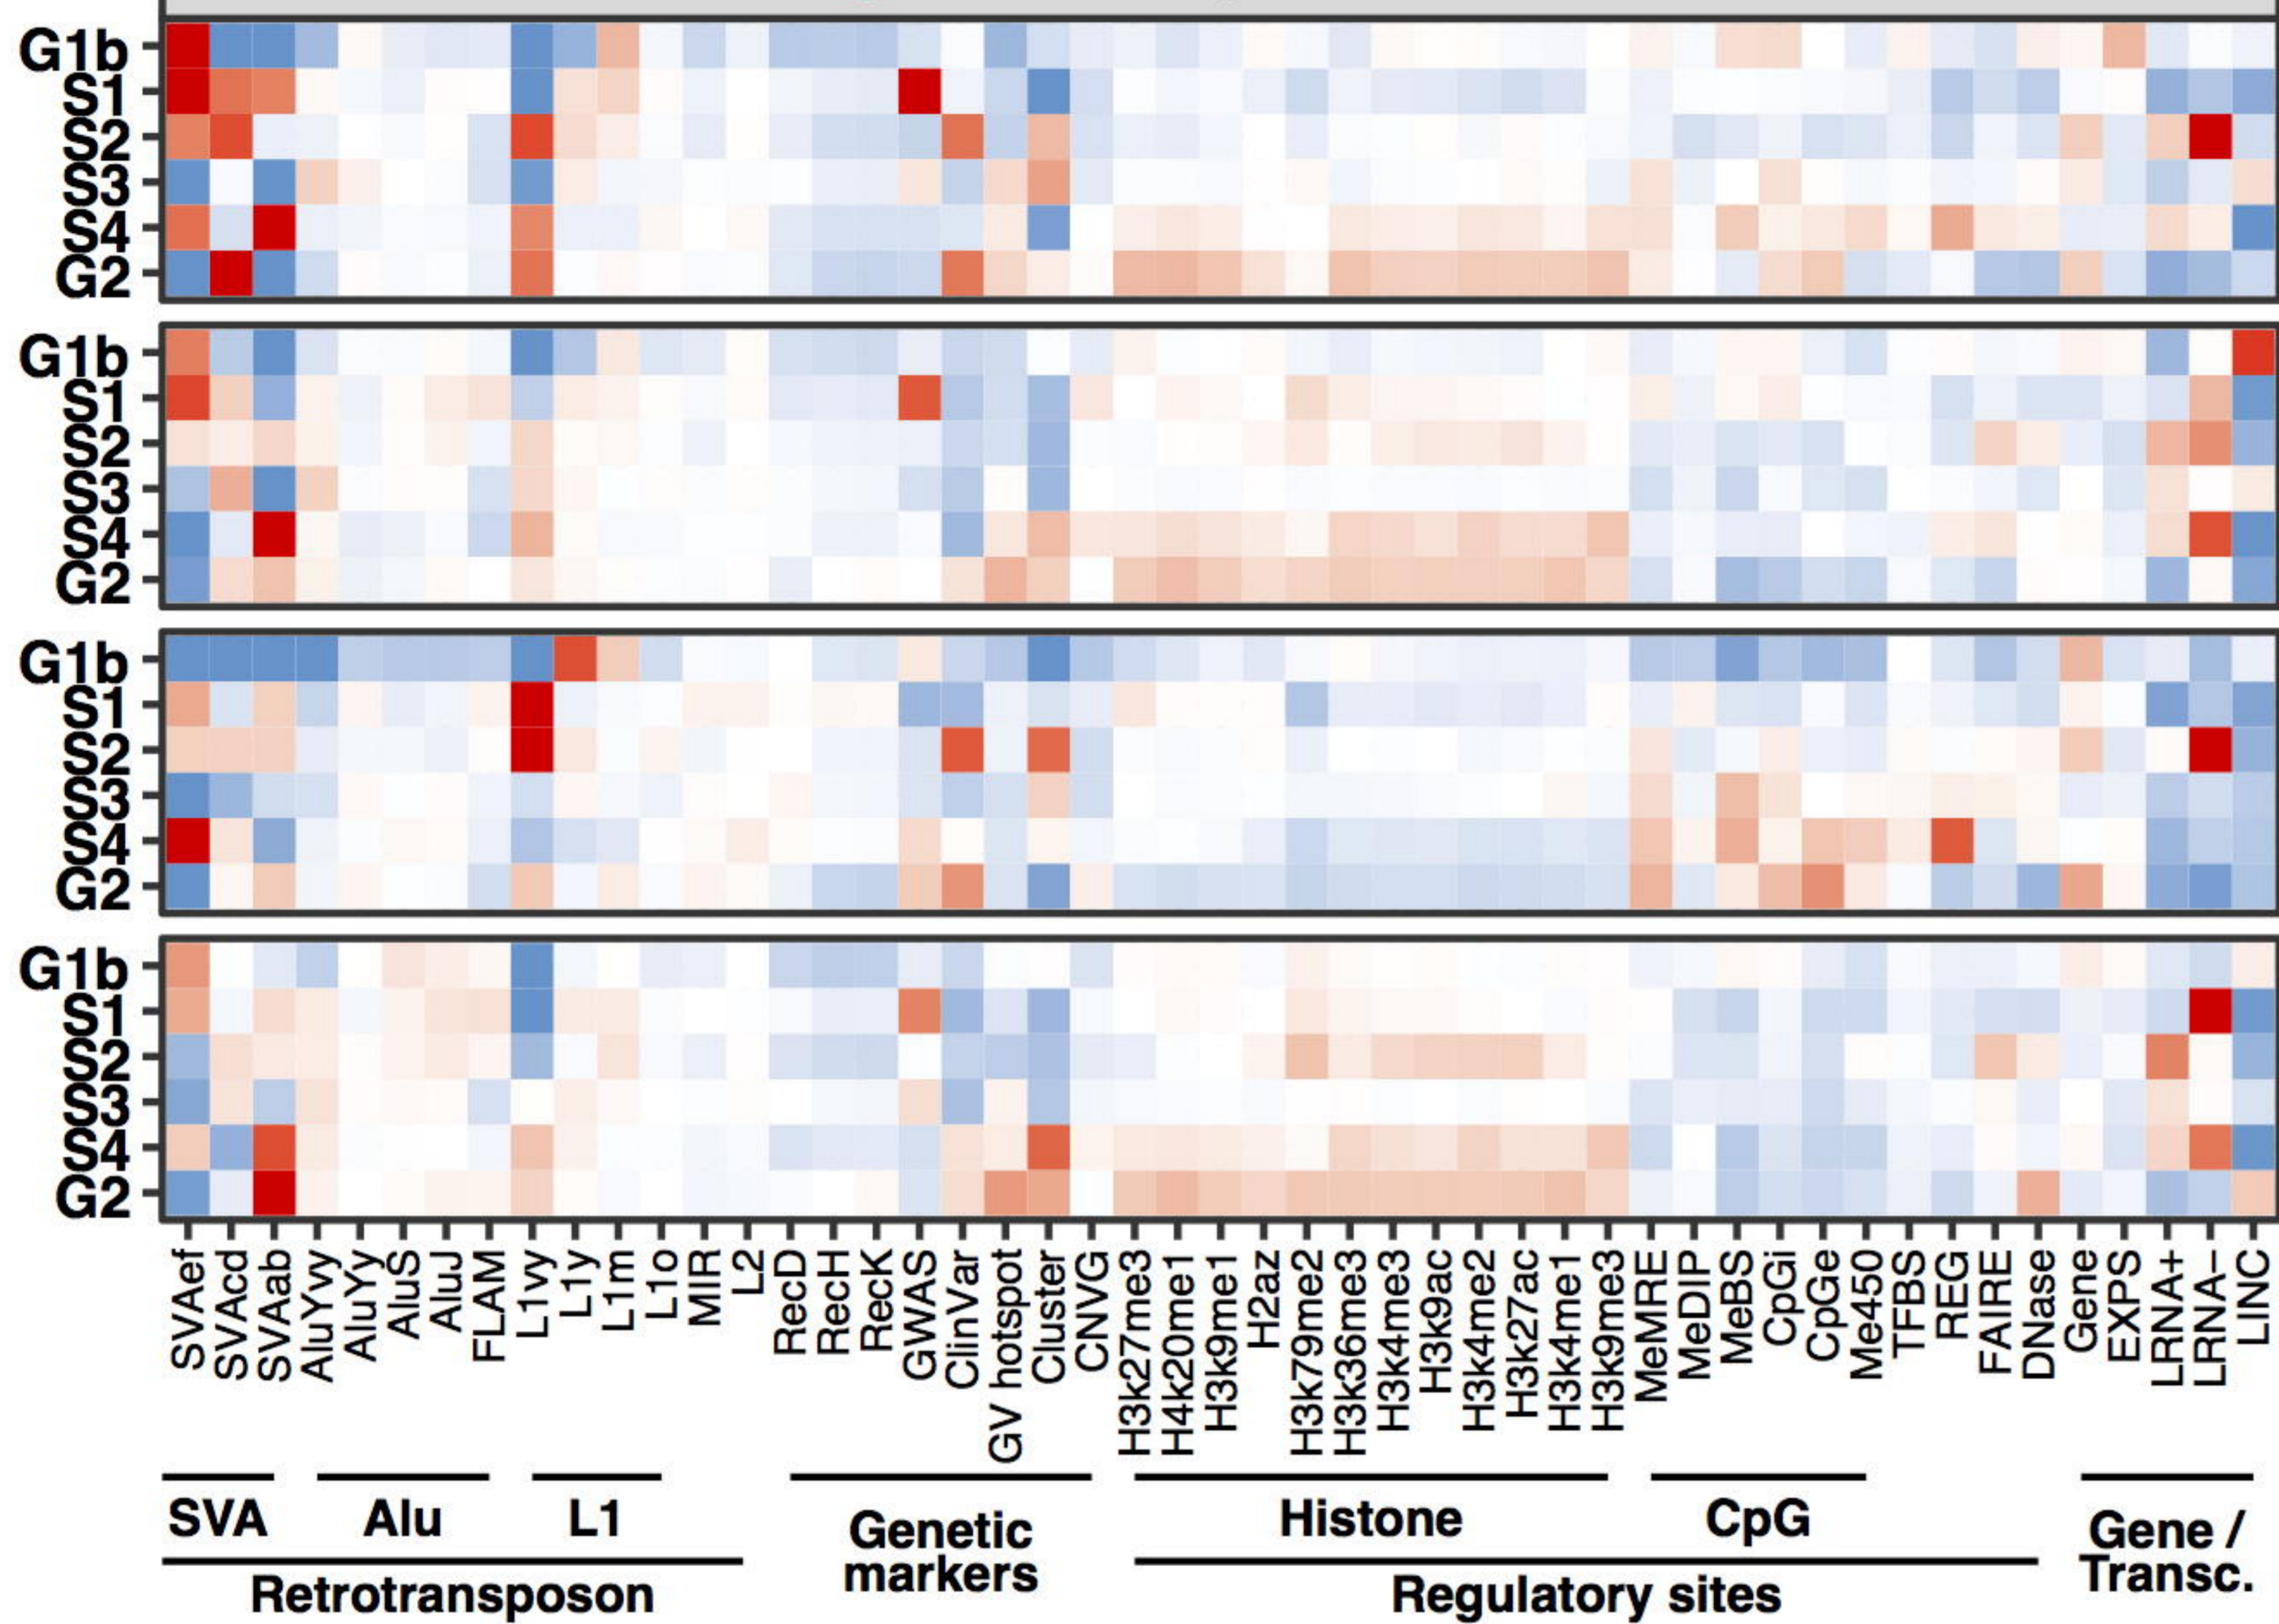

### Group 2-favoring CNVG features

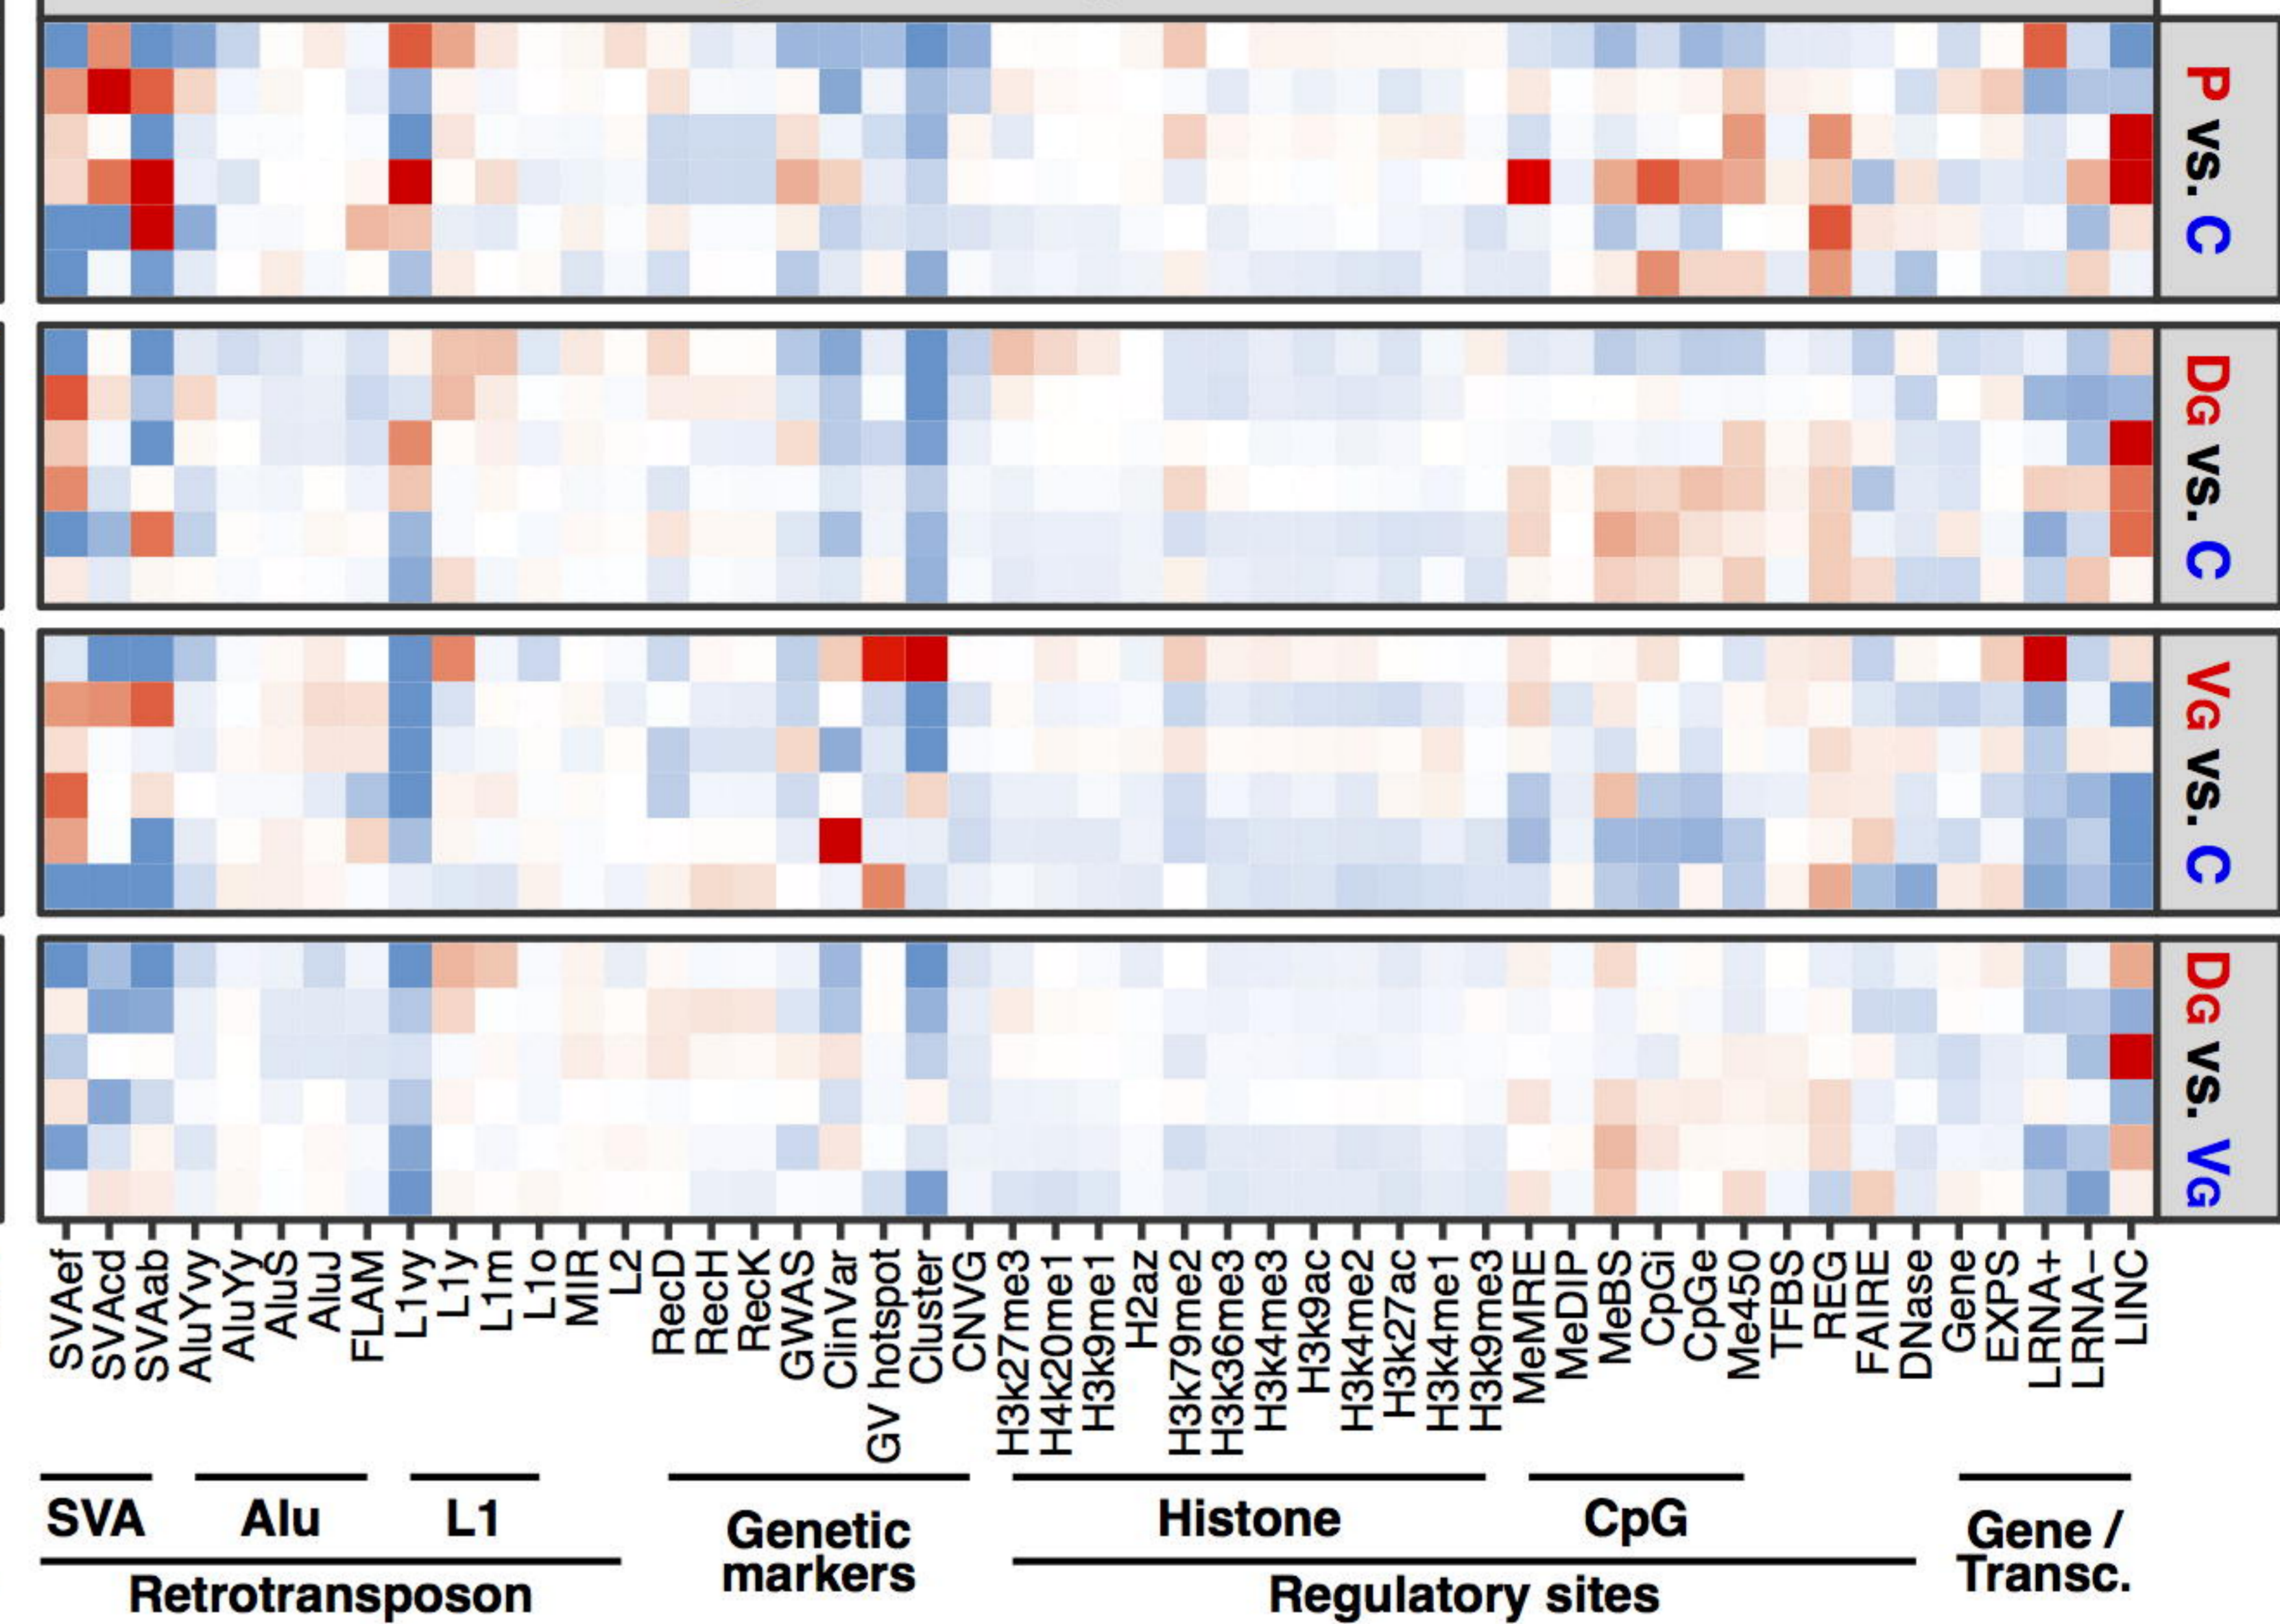

### Group 1-favoring CNVL features

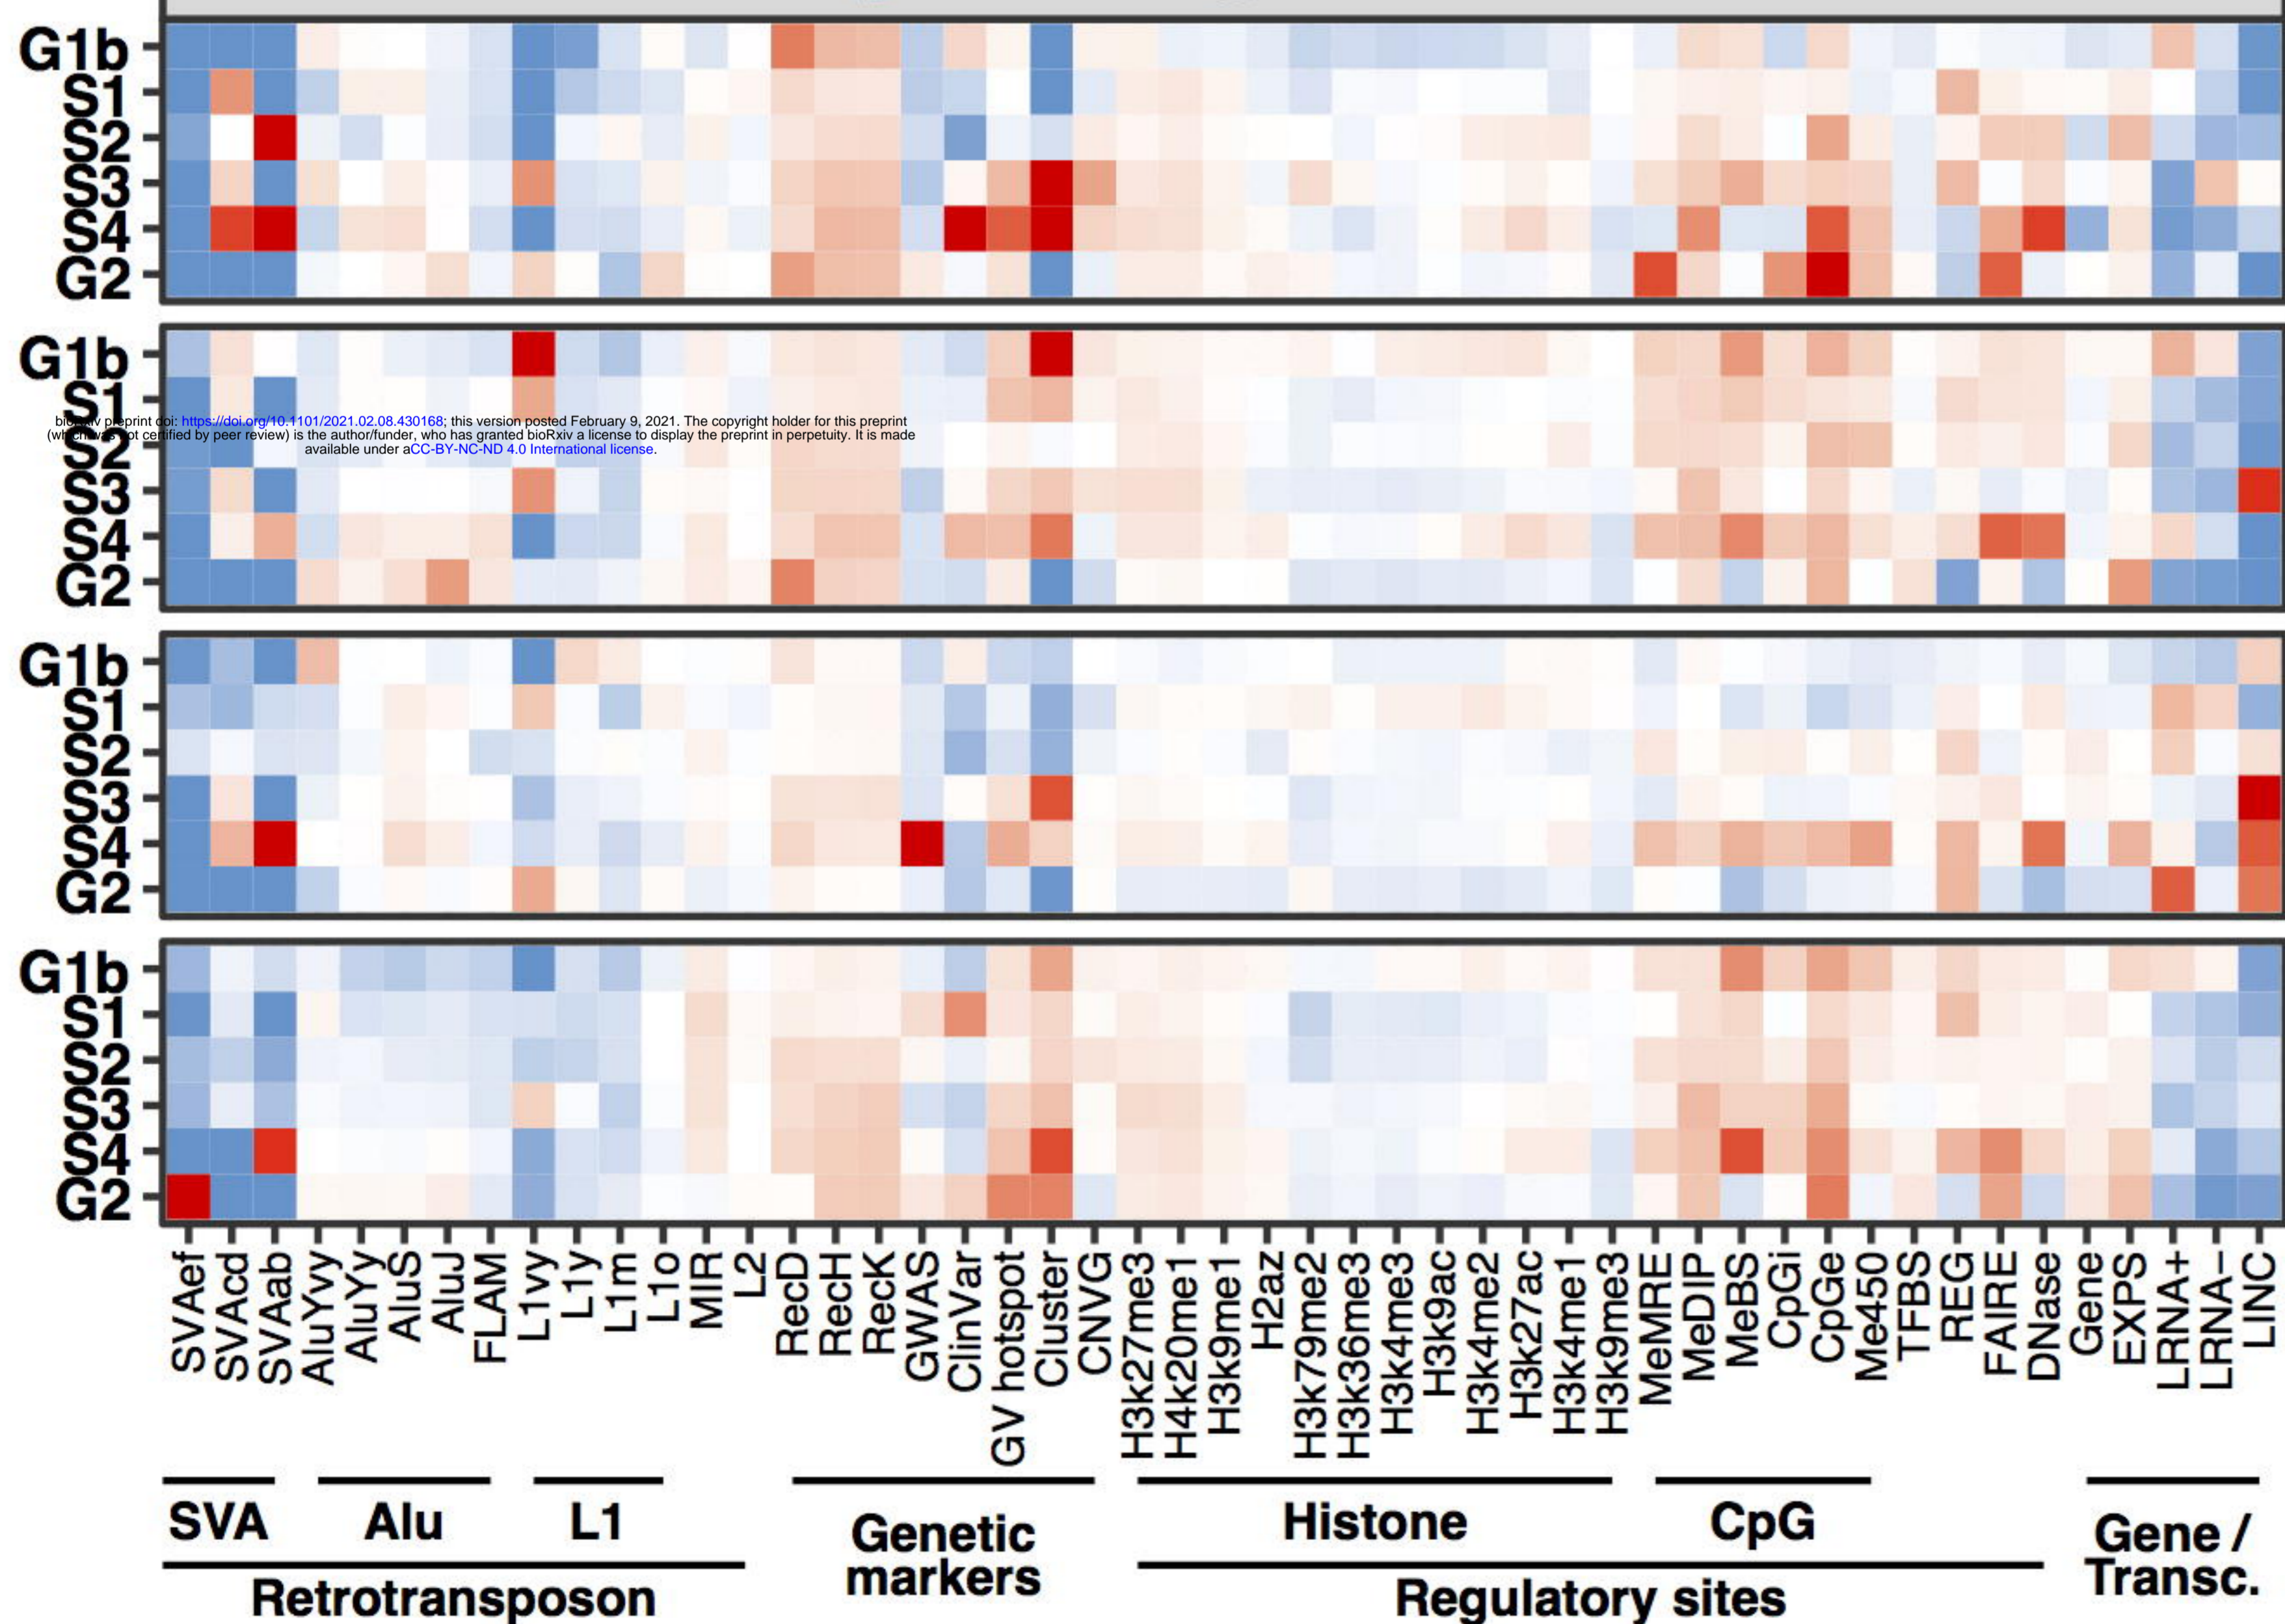

### Group 2-favoring CNVL features

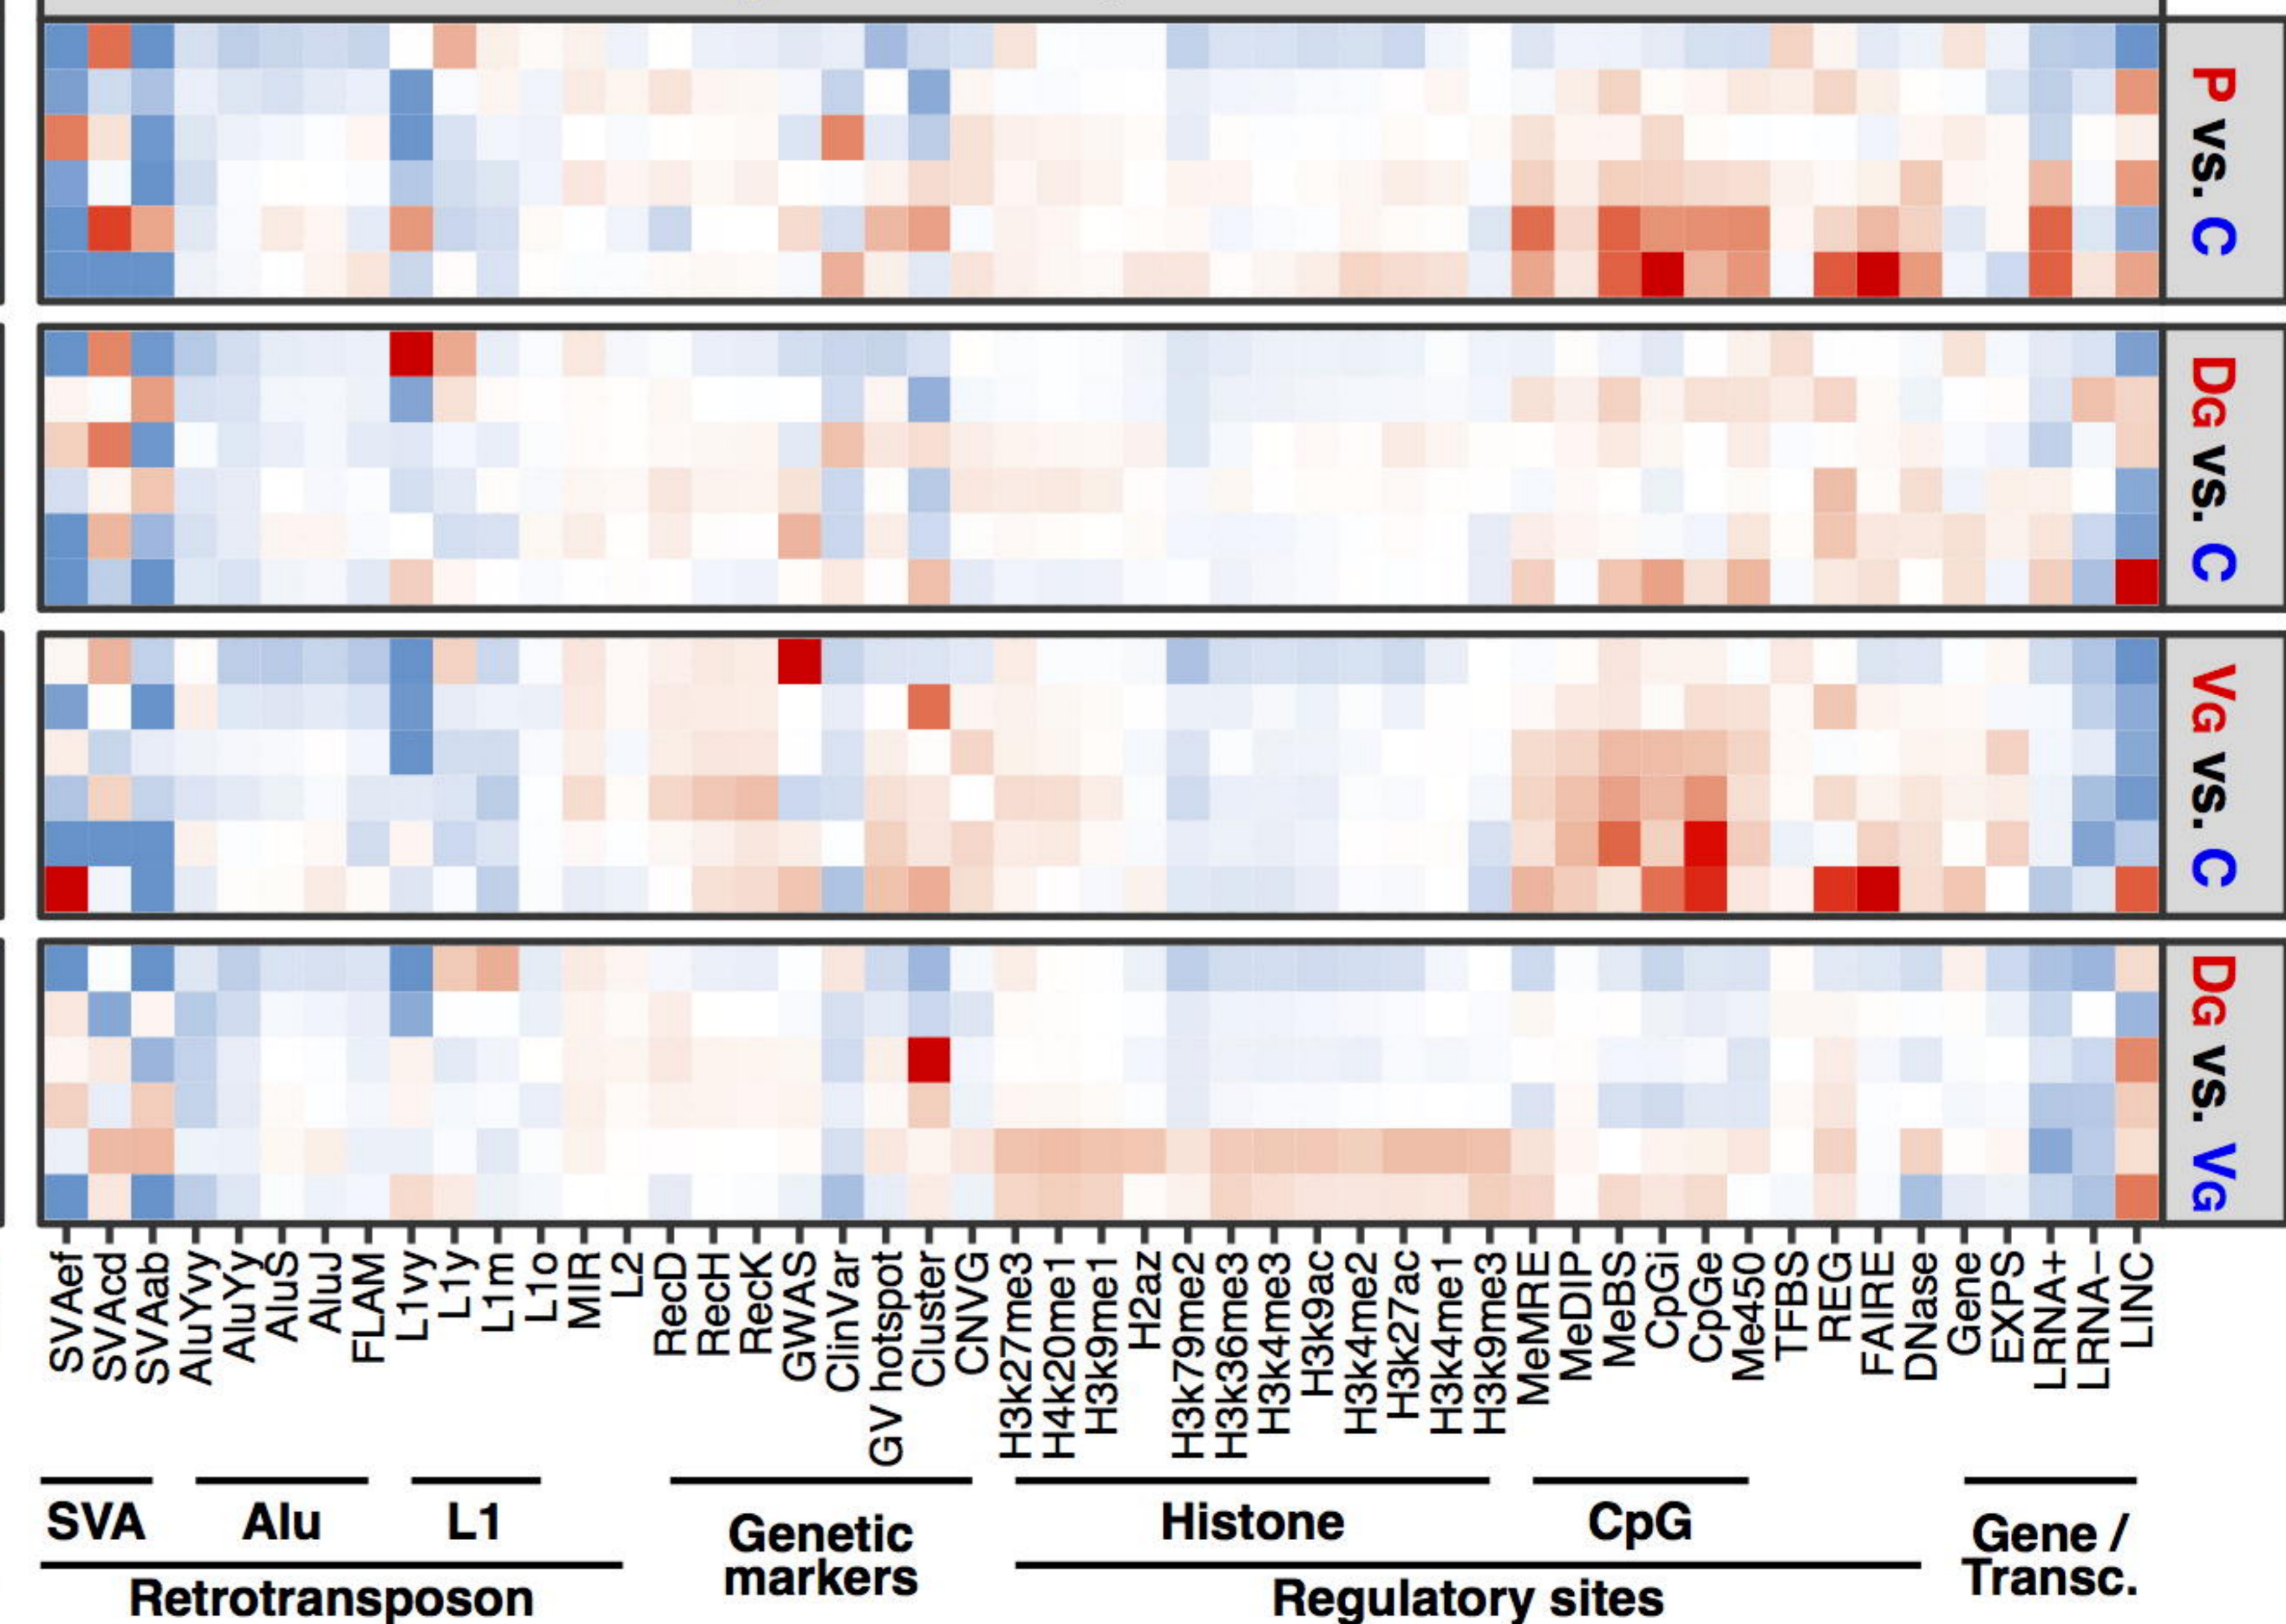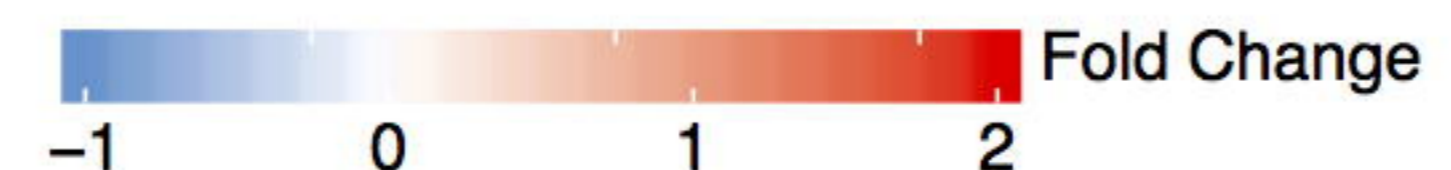

bioRxiv preprint doi: <https://doi.org/10.1101/2021.02.08.430168>; this version posted February 9, 2021. The copyright holder for this preprint (which was not certified by peer review) is the author/funder, who has granted bioRxiv a license to display the preprint in perpetuity. It is made available under aCC-BY-NC-ND 4.0 International license.

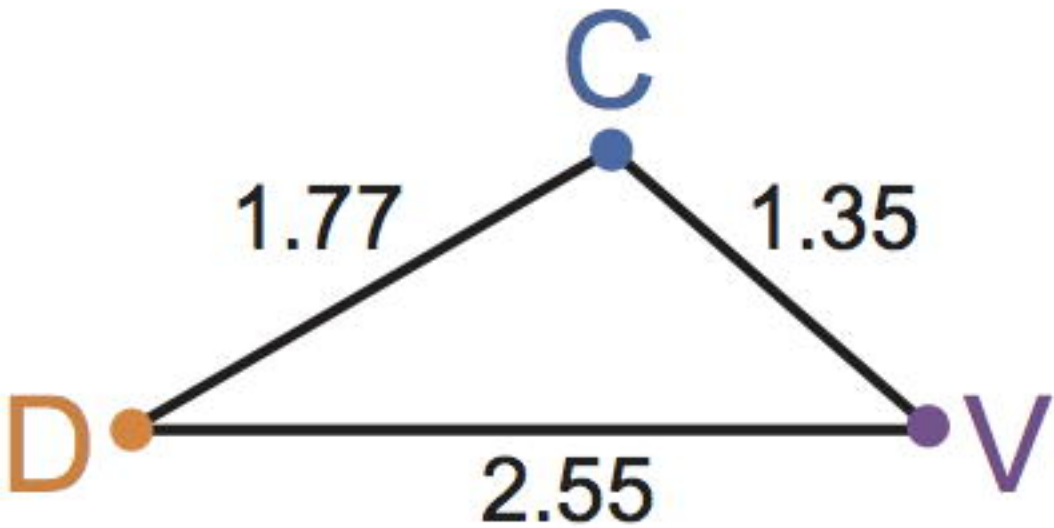

Source: https://www.biorxiv.org/content/10.1101/2021.02.08.430168v1.full.pdf
